# Supplementary material
Source: PubMed Central journal article supplement (PMC3227774)
Supplement: NIHMS338066-supplement-1_si_001.pdf [file NIHMS338066-supplement-1_si_001.pdf]

Supporting Information for:

**Radical Cation Diels–Alder Cycloadditions by Visible Light Photocatalysis**

Shishi Lin, Michael A. Ischay, Charles G. Fry, and Tehshik P. Yoon\*

*Department of Chemistry, University of Wisconsin–Madison, 1101 University Avenue, Madison, WI 53706*

|                                                     |           |
|-----------------------------------------------------|-----------|
| <b>I. General information</b>                       | <b>1</b>  |
| <b>II. Catalyst synthesis</b>                       | <b>1</b>  |
| <b>III. Synthesis of cyclization substrates</b>     | <b>2</b>  |
| <b>IV. Photocycloadditions</b>                      | <b>2</b>  |
| <b>V. Studies on the synthesis of heitziamide A</b> | <b>7</b>  |
| <b>VI. Representative NOEs</b>                      | <b>9</b>  |
| <b>VII. References</b>                              | <b>10</b> |
| <b>VIII. NMR spectra</b>                            | <b>11</b> |

**I. General Information**

Methyl viologen bis(hexafluorophosphate) (MV(PF<sub>6</sub>)<sub>2</sub>)<sup>1</sup>, tris(bipyridyl)ruthenium(II) bis(hexafluorophosphate) (Ru(bpy)<sub>3</sub>(PF<sub>6</sub>)<sub>2</sub>)<sup>1</sup> and tris(bipyridyl)ruthenium(II) bis(hexafluorophosphate) (Ru(bpz)<sub>3</sub>(PF<sub>6</sub>)<sub>2</sub>)<sup>2</sup> were prepared as previously described. *trans*-1-Phenyl-1,3-butadiene,<sup>3</sup> methyl 2,4-pentadienoate,<sup>4</sup> 1-(4-methoxyphenyl)cyclohexene,<sup>5</sup> 1-acetoxy-4-propenylbenzene,<sup>6</sup> (*E*)-1-(*tert*-butyldimethylsilyloxy)-3-(4-methoxyphenyl)-2-propene<sup>7</sup>, (*Z*)-1-(4-methoxyphenyl)propene<sup>8</sup>, (*E*)-4-methoxystyryl acetate<sup>9</sup> and (*E*)-(1-propenyloxy)benzene<sup>10</sup> were synthesized as previously described, and all spectroscopic data were consistent with those reported for these compounds. 1-(4-Methoxyphenyl)cyclopentene was synthesized using the same method as 1-(4-methoxyphenyl)cyclohexene, and its spectroscopic data were consistent with reported values.<sup>11</sup> (*E*)-*tert*-Butyldimethyl(4-(prop-1-en-1-yl)phenoxy)silane is a new compound and its synthesis is reported below. All dienes were purified prior to use. MeCN, THF, Et<sub>2</sub>O and CH<sub>2</sub>Cl<sub>2</sub> were purified by elution through alumina as described by Grubbs.<sup>12</sup> A 23 W (1200 lumens) SLI Lighting Mini-Lynx compact fluorescent light bulb was used for all photochemical reactions unless otherwise stated. Flash column chromatography was performed with Silicycle 40-63Å silica (230-400 mesh). Diastereomer ratios for all compounds were determined by <sup>1</sup>H NMR analysis of the unpurified reaction mixture. <sup>1</sup>H and <sup>13</sup>C NMR data for all previously uncharacterized compounds were obtained using Varian Inova-500 and Varian Unity-500 spectrometers and are referenced to TMS (0.0 ppm) and CDCl<sub>3</sub> (77.0 ppm) respectively unless otherwise stated. IR spectral data were obtained using a Bruker Vector 22 spectrometer (thin film on NaCl). Melting points were obtained using a Mel-Temp II (Laboratory Devices, Inc., USA) melting point apparatus. Mass spectrometry was performed with a Waters (Micromass) AutoSpec<sup>®</sup>. These facilities are funded by the NSF (CHE-9974839, CHE-9304546) and the University of Wisconsin.

**II. Catalyst synthesis.**

**2,2'-Bipyrazine (bpz).** Chloropyrazine (5.0 g, 43.7 mmol), Pd(PPh<sub>3</sub>)<sub>4</sub> (1.5 g, 1.3 mmol), tetrabutylammonium bromide (14.0 g, 43.4 mmol), K<sub>2</sub>CO<sub>3</sub> (20.5 g, 148.3 mmol) and DMF (42 mL) were placed together in a 250 mL round-bottomed flask. The reaction was heated to 140 °C, open to the atmosphere. After 16 h, the reaction was cooled to ambient temperature and filtered through celite. The filter pad was rinsed with CH<sub>2</sub>Cl<sub>2</sub>, and the filtrate was washed with water (400 mL). The aqueous phase was extracted 3 times with CH<sub>2</sub>Cl<sub>2</sub>. The combined organic layers were washed 3 times with water, dried over MgSO<sub>4</sub> and concentrated by rotary evaporation. Flash column chromatography (1:1 hexanes/ethyl acetate) gave the crude product,

which was triturated with MeOH to afford 1.46 g (9.23 mmol, 42 % yield) of a pale yellow solid. All spectroscopic data were consistent with previously reported values.<sup>13</sup>

**Ru(bpz)<sub>3</sub>(BArF)<sub>2</sub>.** A solution of tris(bipyridyl)ruthenium(II) dichloride<sup>14</sup> (450 mg, 0.70 mmol) in 30 mL water was placed in a 100 mL round-bottomed flask. Sodium (tetrakis[3,5-trifluoromethyl]phenyl]borate)<sup>15</sup> (1.36 g, 1.53 mmol) dissolved in methanol (10 mL) was added to the reaction mixture followed by water (10 mL). The resulting heterogeneous suspension was filtered through a fritted glass funnel. The collected solids were dissolved in 1:1 acetone:CH<sub>2</sub>Cl<sub>2</sub> and purified by alumina flash column chromatography using CH<sub>2</sub>Cl<sub>2</sub> as the eluent. Upon concentration by rotary evaporation, the crude product was recrystallized from CH<sub>2</sub>Cl<sub>2</sub>:benzene to afford 820 mg (0.356 mmol, 51 % yield) of an orange solid. IR (neat) 3000, 2090, 1653, 1265 cm<sup>-1</sup>. <sup>1</sup>H NMR: (500 MHz, CD<sub>3</sub>CN) δ 9.8 (d, J = 1.3 Hz, 6H), 8.6 (d, J = 3.2 Hz, 6H), 7.8 (dd, J = 3.2, 1.3 Hz, 6H), 7.7 (m, 16H), 7.7 (s, 8H). <sup>13</sup>C NMR: (125 MHz, CD<sub>3</sub>CN) δ 162.7 (q, J = 50.5 Hz), 151.3, 149.8, 148.1, 146.5, 135.7, 130.0 (q, J = 31.6 Hz), 125.5 (q, J = 124.44 Hz), 118.7.

### III. Synthesis of cyclization substrates

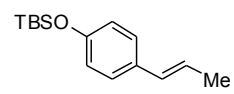 **(E)-tert-Butyldimethyl(4-(prop-1-en-1-yl)phenoxy)silane.** A solution of ethyl triphenylphosphonium iodide (4.18 g, 10.0 mmol) in 50 mL dry THF was placed in a flame-dried 100 mL round-bottomed flask. The solution was cooled to 0 °C, and *n*-BuLi (1.6 M in hexanes, 10.0 mmol) was added dropwise. After stirring at 0 °C for 30 minutes, *p*-hydroxybenzaldehyde (611 mg, 5.0 mmol) was added. The reaction mixture was gradually warmed to room temperature. After 12 h, the reaction was quenched by slow addition of saturated NH<sub>4</sub>Cl. The phases were separated, and the aqueous phase was extracted twice with Et<sub>2</sub>O. The combined organic layers were washed with brine, dried over MgSO<sub>4</sub>, and concentrated by rotary evaporation. Flash column chromatography (gradient, 15:1 to 5:1 hexanes/EtOAc) afforded 472 mg (3.6 mmol, 70% yield) of (*E*)-4-(prop-1-en-1-yl)phenol. The phenol (150 mg, 1.1 mmol) was dissolved in 0.5 mL DMF in a 10 mL round-bottom flask, to which imidazole (152 mg, 2.2 mmol) and TBSCl (253 mg, 1.7 mmol) were added. After 8 h, flash column chromatography (gradient, 50:1 to 30:1 hexanes/EtOAc) afforded 245 mg (1.0 mmol, 88% yield) of a clear oil. IR (neat) 3026, 2959, 2253, 1508, 1261, 907 cm<sup>-1</sup>. <sup>1</sup>H NMR: (500 MHz, CDCl<sub>3</sub>) δ 7.19 (d, J = 8.5 Hz, 2H), 6.76 (d, J = 8.5 Hz, 2H), 6.33 (dd, J = 15.4, 1.5 Hz, 1H), 6.08 (dq, J = 15.4, 6.4 Hz, 1H), 1.85 (dd, J = 6.6, 1.5 Hz, 3H), 0.97 (s, 9H), 0.18 (s, 6H); <sup>13</sup>C NMR: (125 MHz, CDCl<sub>3</sub>) δ 154.6, 131.3, 130.4, 126.8, 123.6, 120.1, 25.7, 18.4, 18.2, -4.4. HRMS (ESI) calculated for [C<sub>15</sub>H<sub>24</sub>OSi]<sup>+</sup> requires *m/z* 248.1591, found *m/z* 248.1595.

### IV. Photocycloadditions

**General Procedure:** A solution of the dienophile in CH<sub>2</sub>Cl<sub>2</sub> (0.08 M) was placed in a 25 mL round-bottomed flask. In a dark hood, the diene (2–3 equiv) and Ru(bpz)<sub>3</sub>(BArF)<sub>2</sub> (0.005– 0.03 equiv) were added to the flask. The reaction was stirred at ambient temperature in front of a 23 W CFL bulb. Upon consumption of the dienophile, the reaction was eluted through a short pad of silica using EtOAc. After concentration by rotary evaporation, the pure cycloadduct was isolated by flash column chromatography.

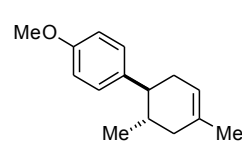 **Chart 1, compound 3.** Experiment 1: Prepared according to the General Procedure using 100.2 mg (0.676 mmol) *trans*-anethole, 202 μL (2.02 mmol) isoprene, 7.8 mg (0.0034 mmol) Ru(bpz)<sub>3</sub>(BArF)<sub>2</sub>, 8.4 mL CH<sub>2</sub>Cl<sub>2</sub> and an irradiation time of 1.0 h. Elution through a pad of silica using EtOAc and concentration by rotary evaporation afforded 145 mg (0.670 mmol, 99%) of analytically pure cycloadduct as a clear oil. Experiment 2: 100.6 mg (0.679 mmol) *trans*-anethole, 202 μL (2.02 mmol) isoprene, 7.8 mg (0.0034 mmol) Ru(bpz)<sub>3</sub>(BArF)<sub>2</sub> and 8.4 mL CH<sub>2</sub>Cl<sub>2</sub>. Isolated 142 mg (0.656 mmol, 97% yield, dr: >10:1). IR (neat) 2951, 2834, 1512, 1038 cm<sup>-1</sup>. <sup>1</sup>H NMR: (500 MHz, CDCl<sub>3</sub>) δ 7.12 (d, J = 8.5 Hz, 2H), 6.87 (d, J = 8.5 Hz, 2H), 5.48 (bs, 1H), 3.82 (s, 3H), 2.33 (td, J = 11.3, 5.1 Hz, 1H), 2.25 (m, 1H), 2.19 (m, 1H), 2.12 (dd, J = 17.6, 4.0 Hz, 1H), 1.92 (qd, J = 5.7, 1.7 Hz, 1H), 1.83 (m, 1H), 1.72 (s, 3H), 0.74 (d, J = 6.2 Hz, 3H); <sup>13</sup>C NMR: (125 MHz, CDCl<sub>3</sub>) δ 157.8, 138.2, 133.8, 128.5, 120.9, 113.7, 55.2, 47.0, 39.9, 35.3, 34.0, 23.4, 20.3. HRMS (EI) calculated for [C<sub>15</sub>H<sub>20</sub>O]<sup>+</sup> requires *m/z* 216.1509, found *m/z* 216.1511.

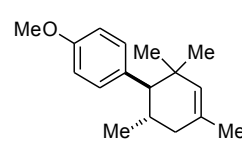 **Chart 1, compound 7.** Experiment 1: Prepared according to the General Procedure using 100.4 mg (0.677 mmol) *trans*-anethole, 262 μL (2.02 mmol) 2,4-dimethyl-1,3-pentadiene, 7.8 mg (0.0034 mmol) Ru(bpz)<sub>3</sub>(BArF)<sub>2</sub>, 8.4 mL CH<sub>2</sub>Cl<sub>2</sub> and an irradiation time of 2.0 h. Purification by flash column chromatography (50:1 hexanes/EtOAc) afforded 149 mg (0.610 mmol, 90 %) of a clear oil. Experiment 2: 100.1 mg (0.675 mmol) *trans*-anethole, 262 μL (2.02 mmol) 2,4-dimethyl-1,3-

pentadiene, 7.8 mg (0.0034 mmol) Ru(bpz)<sub>3</sub>(BARF)<sub>2</sub> and 8.4 mL CH<sub>2</sub>Cl<sub>2</sub>. Isolated 152 mg (0.622 mmol, 92 % yield, dr: >10:1). IR (neat) 2956, 1512, 907, 733 cm<sup>-1</sup>. <sup>1</sup>H NMR: (500 MHz, C<sub>6</sub>D<sub>6</sub>) δ 6.96 (dd, J = 20.3, 7.5 Hz, 2H), 6.81 (dd, J = 46.7, 7.5 Hz, 2H), 5.28 (s, 1H), 3.36 (s, 3H), 2.20 (d, J = 12.1 Hz, 1H), 2.12 (m, 1H), 1.97 (dd, J = 17.6, 4.9 Hz, 1H), 1.69 (d, J = 10.4 Hz, 1H), 1.66 (s, 3H), 0.94 (s, 1H), 0.90 (s, 1H), 0.77 (d, J = 6.4 Hz, 3H); <sup>13</sup>C NMR: (125 MHz, CDCl<sub>3</sub>) δ 157.8, 133.1, 130.3, 129.3, 113.2, 112.1, 57.5, 55.0, 40.3, 36.0, 29.9, 28.7, 24.4, 23.0, 20.6. HRMS (EI) calculated for [C<sub>17</sub>H<sub>24</sub>O]<sup>+</sup> requires *m/z* 244.1822, found *m/z* 244.1815.

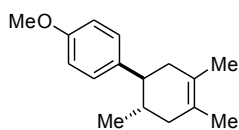

**Chart 1, compound 8.** Experiment 1: Prepared according to the General Procedure using 99.6 mg (0.672 mmol) *trans*-anethole, 230 μL (2.03 mmol) 2,3-dimethyl-1,3-butadiene, 7.8 mg (0.0034 mmol) Ru(bpz)<sub>3</sub>(BARF)<sub>2</sub>, 8.4 mL CH<sub>2</sub>Cl<sub>2</sub> and an irradiation time of 1.0 h. Elution through a pad of silica using EtOAc and concentration by rotary evaporation afforded 154 mg (0.669 mmol, 99%) of analytically pure cycloadduct as a clear oil. Experiment 2: 100.7 mg (0.679 mmol) *trans*-anethole,

230 μL (2.03 mmol) 2,3-dimethyl-1,3-butadiene, 7.8 mg (0.0034 mmol) Ru(bpz)<sub>3</sub>(BARF)<sub>2</sub> and 8.4 mL CH<sub>2</sub>Cl<sub>2</sub>. Isolated 150 mg (0.651 mmol, 96% yield, dr: >10:1). IR (neat) 3032, 2888, 1456, 1246 cm<sup>-1</sup>. <sup>1</sup>H NMR: (500 MHz, CDCl<sub>3</sub>) δ 7.07 (d, J = 8.6 Hz, 2H), 6.83 (d, J = 8.6 Hz, 2H), 3.77 (s, 3H), 2.33 (td, J = 10.8, 5.2 Hz, 1H), 2.16 (m, 1H), 2.08 (m, 2H), 1.84 (m, 2H), 1.64 (s, 3H), 1.61 (s, 3H), 0.70 (d, J = 6.1 Hz, 3H); <sup>13</sup>C NMR: (125 MHz, CDCl<sub>3</sub>) δ 157.8, 138.2, 128.5, 125.5, 125.3, 113.7, 55.2, 47.9, 41.9, 41.7, 34.3, 20.1, 18.8, 18.7. HRMS (EI) calculated for [C<sub>16</sub>H<sub>22</sub>O]<sup>+</sup> requires *m/z* 230.1666, found *m/z* 230.1665.

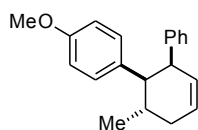

**Chart 1, compound 9.** Experiment 1: Prepared according to the General Procedure using 99.8 mg (0.673 mmol) *trans*-anethole, 176 mg (1.35 mmol) 1-phenyl-1,3-butadiene, 7.8 mg (0.0034 mmol) Ru(bpz)<sub>3</sub>(BARF)<sub>2</sub>, 8.4 mL CH<sub>2</sub>Cl<sub>2</sub> and an irradiation time of 20 h. Purification by flash column chromatography (50:1 hexanes/EtOAc) afforded 134 mg (0.481 mmol, 72%) of a clear oil. Experiment 2: 100.2 mg (0.676 mmol) *trans*-anethole, 176 mg (1.35 mmol) 1-phenyl-1,3-butadiene, 7.8 mg (0.0034

mmol) Ru(bpz)<sub>3</sub>(BARF)<sub>2</sub> and 8.4 mL CH<sub>2</sub>Cl<sub>2</sub>. Isolated 136 mg (0.489 mmol, 72% yield, dr: >10:1). IR (neat) 3017, 2966, 2873, 1497, 1055 cm<sup>-1</sup>. <sup>1</sup>H NMR: (500 MHz, CDCl<sub>3</sub>) δ 7.09 (m, 3H), 6.74 (d, J = 8.0 Hz, 2H), 6.60 (d, J = 9.0 Hz, 2H), 6.47 (d, J = 8.0 Hz, 2H), 5.98 (m, 1H), 5.83 (m, 1H), 3.74 (s, 3H), 3.49 (m, 1H), 2.88 (dd, J = 11.8, 5.9 Hz, 1H), 2.45 (dt, J = 18.1, 5.6 Hz, 1H), 2.16 (m, 1H), 1.94 (m, 1H), 0.71 (d, J = 6.6 Hz, 3H); <sup>13</sup>C NMR: (125 MHz, CDCl<sub>3</sub>) δ 157.5, 140.7, 134.3, 130.6, 130.1, 129.5, 127.5, 127.1, 126.0, 112.7, 55.1, 51.8, 48.7, 35.3, 26.3, 20.3. HRMS (EI) calculated for [C<sub>20</sub>H<sub>22</sub>O]<sup>+</sup> requires *m/z* 278.1666, found *m/z* 278.1666.

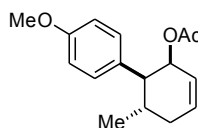

**Chart 1, compound 10.** Experiment 1: Prepared according to the General Procedure using 100.3 mg (0.677 mmol) *trans*-anethole, 227 mg (2.02 mmol) 1-acetoxy-1,3-butadiene, 47 mg (0.0202 mmol) Ru(bpz)<sub>3</sub>(BARF)<sub>2</sub>, 8.4 mL CH<sub>2</sub>Cl<sub>2</sub> and an irradiation time of 18 h. Purification by flash column chromatography (gradient, 25:1 to 15:1 to 10:1 to 5:1 hexanes/EtOAc) afforded 117 mg (0.449 mmol, 66%) of a white solid. Experiment 2: 100.1 mg (0.675 mmol) *trans*-anethole, 230 mg (2.05 mmol) 1-

acetoxy-1,3-butadiene, 47 mg (0.0202 mmol) Ru(bpz)<sub>3</sub>(BARF)<sub>2</sub> and 8.4 mL CH<sub>2</sub>Cl<sub>2</sub>. Isolated 120 mg (0.461 mmol, 68% yield, dr: >10:1). IR (neat) 3034, 2952, 1730, 1514, 1179 cm<sup>-1</sup>. <sup>1</sup>H NMR: (500 MHz, C<sub>6</sub>D<sub>6</sub>) δ 7.02 (dd, J = 8.7, 2.0 Hz, 2H), 6.79 (dd, J = 8.7, 1.8 Hz, 2H), 6.03 (m, 1H), 5.78 (ddd, J = 9.8, 5.1, 2.2 Hz, 1H), 5.44 (t, J = 4.2 Hz, 1H), 3.33 (s, 1H), 2.41 (dd, J = 12.0, 3.7 Hz, 1H), 2.28 (m, 1H), 2.08 (dtd, J = 18.5, 5.0, 1.0 Hz, 1H), 1.60 (s, 3H), 1.55 (m, 1H), 0.72 (d, J = 6.5 Hz, 3H); <sup>13</sup>C NMR: (125 MHz, CDCl<sub>3</sub>) δ 170.1, 158.3, 132.8, 130.1, 124.9, 113.3, 69.9, 55.1, 50.9, 35.0, 26.7, 21.3, 19.7. HRMS (EI) calculated for [C<sub>16</sub>H<sub>20</sub>O<sub>3</sub>]<sup>+</sup> requires *m/z* 260.1407, found *m/z* 260.1411.

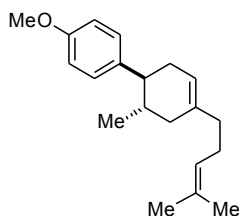

**Chart 1, compound 11.** Experiment 1: Prepared according to the General Procedure using 100.8 mg (0.680 mmol) *trans*-anethole, 350 μL (2.03 mmol) myrcene, 7.8 mg (0.0034 mmol) Ru(bpz)<sub>3</sub>(BARF)<sub>2</sub>, 8.4 mL CH<sub>2</sub>Cl<sub>2</sub> and an irradiation time of 1.5 h. Purification by flash column chromatography (60:1 hexanes/EtOAc) afforded 170 mg (0.598 mmol, 88%) of a clear oil. Experiment 2: 100.5 mg (0.678 mmol) *trans*-anethole, 350 μL (2.03 mmol) myrcene, 7.8 mg (0.0034

mmol) Ru(bpz)<sub>3</sub>(BARF)<sub>2</sub> and 8.4 mL CH<sub>2</sub>Cl<sub>2</sub>. Isolated 168 mg (0.591 mmol, 87% yield, dr: >10:1). IR (neat) 2966, 2834, 1513, 1247 cm<sup>-1</sup>. <sup>1</sup>H NMR: (500 MHz, CDCl<sub>3</sub>) δ 7.08 (d, J = 8.6 Hz, 2H), 6.83 (d, J = 8.6 Hz, 2H), 5.46 (s, 1H), 5.14 (m, 1H), 3.78 (s, 3H), 2.31 (m, 1H), 2.20 (m, 2H), 2.09 (m, 3H), 1.99 (m, 2H), 1.88 (m, 1H), 1.80 (m, 1H), 1.70 (s, 3H), 1.62 (s, 3H), 0.71 (d, 3H); <sup>13</sup>C NMR: (125 MHz, CDCl<sub>3</sub>) δ 157.8, 138.2, 137.5, 131.4, 128.5, 124.4, 120.4, 113.7, 55.1, 47.0, 38.1, 37.5, 35.1, 33.9, 26.4, 25.7, 20.2, 17.7. HRMS (EI) calculated for [C<sub>20</sub>H<sub>28</sub>O]<sup>+</sup> requires *m/z* 284.2135, found *m/z* 284.2140.

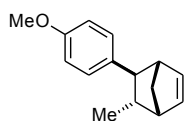

**Chart 1, compound 12.** Experiment 1: Prepared according to the General Procedure using 100.5 mg (0.678 mmol) *trans*-anethole, 170  $\mu$ L (2.02 mmol) 1,3-cyclopentadiene, 7.8 mg (0.0034 mmol) Ru(bpz)<sub>3</sub>(BARF)<sub>2</sub>, 8.4 mL CH<sub>2</sub>Cl<sub>2</sub> and an irradiation time of 1.5 h. Purification by flash column chromatography (55:1 hexanes/EtOAc) afforded 134 mg (0.625 mmol, 92%) of a colorless oil.

Experiment 2: 100.2 mg (0.676 mmol) of *trans*-anethole, 170  $\mu$ L (2.02 mmol) of 1,3-cyclopentadiene, 7.8 mg (0.0034 mmol) of Ru(bpz)<sub>3</sub>(BARF)<sub>2</sub> and 8.4 mL of CH<sub>2</sub>Cl<sub>2</sub>. Isolated 131 mg (0.611 mmol, 90% yield, dr: 6:1). All spectroscopic data were consistent with previously reported values.<sup>16</sup>

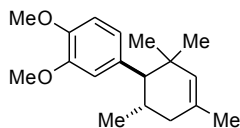

**Chart 1, compound 13.** Experiment 1: Prepared according to the General Procedure using 100.3 mg (0.563 mmol) 1,2-dimethoxy-4-propenylbenzene, 217  $\mu$ L (1.68 mmol) 2,4-dimethyl-1,3-pentadiene, 6.5 mg (0.0028 mmol) Ru(bpz)<sub>3</sub>(BARF)<sub>2</sub>, 7.0 mL CH<sub>2</sub>Cl<sub>2</sub> and an irradiation time of 1.0 h. Purification by flash column chromatography (gradient, 40:1 to 20:1 to 10:1 hexanes/EtOAc) afforded 117 mg (0.426 mmol, 76%) of a clear oil. Experiment 2: 100.1 mg (0.562 mmol) of 1,2-

dimethoxy-4-propenylbenzene, 217  $\mu$ L (1.68 mmol) 2,4-dimethyl-1,3-pentadiene, 6.5 mg (0.0028 mmol) Ru(bpz)<sub>3</sub>(BARF)<sub>2</sub> and 7.0 mL CH<sub>2</sub>Cl<sub>2</sub>. Isolated 123 mg (0.448 mmol, 80% yield, dr: >10:1). IR (neat) 2953, 1518, 1255, 1031 cm<sup>-1</sup>. <sup>1</sup>H NMR: (500 MHz, DMSO)  $\delta$  6.87 (d, J = 8.2 Hz, 1H), 6.73 (d, J = 2.1 Hz, 1H), 6.68 (dd, J = 8.2, 2.1 Hz, 1H), 5.21 (s, 1H), 3.77 (s, 3H), 3.76 (s, 3H), 2.19 (m, 2H), 2.11 (m, 1H), 1.74 (dd, J = 17.4, 8.4 Hz, 1H), 1.65 (s, 3H), 0.84 (s, 3H), 0.80 (s, 3H), 0.70 (d, J = 5.7 Hz, 3H); <sup>13</sup>C NMR: (125 MHz, DMSO)  $\delta$  149.1, 148.4, 134.4, 133.7, 130.0, 123.4, 116.6, 113.1, 58.0, 56.9, 56.6, 40.6, 36.4, 30.4, 28.9, 25.2, 23.1, 20.9. HRMS (EI) calculated for [C<sub>18</sub>H<sub>26</sub>O<sub>2</sub>]<sup>+</sup> requires *m/z* 274.1928, found *m/z* 274.1928.

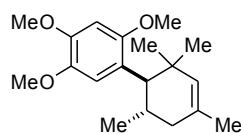

**Chart 1, compound 14.** Experiment 1: Prepared according to the General Procedure using 100.4 mg (0.482 mmol) *trans*-1,2,4-trimethoxy-5-(1-propenyl)benzene, 186  $\mu$ L (1.44 mmol) 2,4-dimethyl-1,3-pentadiene, 5.5 mg (0.0024 mmol) Ru(bpz)<sub>3</sub>(BARF)<sub>2</sub>, 6.0 mL CH<sub>2</sub>Cl<sub>2</sub> and an irradiation time of 8.0 h. Purification by flash column chromatography (gradient, 40:1 to 20:1 to 10:1 hexanes/EtOAc) afforded 107 mg (0.351 mmol, 73%) of a clear oil. Experiment 2: 100.3 mg (0.482 mmol) *trans*-

1,2,4-trimethoxy-5-(1-propenyl)benzene, 186  $\mu$ L (1.44 mmol) 2,4-dimethyl-1,3-pentadiene, 5.5 mg (0.0024 mmol) Ru(bpz)<sub>3</sub>(BARF)<sub>2</sub> and 6.0 mL CH<sub>2</sub>Cl<sub>2</sub>. Isolated 104 mg (0.342 mmol, 71% yield, dr: >10:1). IR (neat) 2928, 1512, 1249, 834 cm<sup>-1</sup>. <sup>1</sup>H NMR: (500 MHz, CDCl<sub>3</sub>)  $\delta$  6.645 (s, 1H), 6.534 (s, 1H), 5.208 (bs, 1H), 3.888 (s, 3H), 3.819 (s, 3H), 3.757 (s, 3H), 2.924 (d, J = 11.4 Hz, 1H), 2.098 (m, 2H), 1.788 (dd, J = 18.4, 11.4 Hz, 1H), 1.667 (s, 3H), 0.832 (s, 3H), 0.793 (s, 3H), 0.690 (d, J = 6.0 Hz, 3H); <sup>13</sup>C NMR: (125 MHz, CDCl<sub>3</sub>)  $\delta$  153.1, 147.4, 142.3, 133.6, 130.2, 121.7, 114.5, 97.7, 56.8, 56.8, 55.9, 46.9, 40.6, 36.8, 29.6, 28.8, 25.1, 23.3, 20.5. HRMS (EI) calculated for [C<sub>19</sub>H<sub>28</sub>O<sub>3</sub>]<sup>+</sup> requires *m/z* 304.2033, found *m/z* 304.2039.

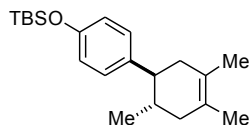

**Chart 1, compound 15.** Experiment 1: Prepared according to the General Procedure using 100.7 mg (0.405 mmol) (*E*)-*tert*-butyldimethyl(4-(prop-1-en-1-yl)phenoxy)silane, 137  $\mu$ L (1.21 mmol) 2,3-dimethyl-1,3-butadiene, 4.6 mg (0.0020 mmol) Ru(bpz)<sub>3</sub>(BARF)<sub>2</sub>, 5.0 mL CH<sub>2</sub>Cl<sub>2</sub> and an irradiation time of 4 h. Purification by flash column chromatography (gradient, 50:1 to 40:1 hexanes/EtOAc) afforded 101 mg (0.306 mmol, 75%) of a clear oil. Experiment 2: 100.1 mg

(0.403 mmol) (*E*)-*tert*-butyldimethyl(4-(prop-1-en-1-yl)phenoxy)silane, 137  $\mu$ L (1.21 mmol) 2,3-dimethyl-1,3-butadiene, 4.6 mg (0.0020 mmol) Ru(bpz)<sub>3</sub>(BARF)<sub>2</sub>, 5.0 mL CH<sub>2</sub>Cl<sub>2</sub>. Isolated 104 mg (0.315 mmol, 78 % yield, dr: >10:1). IR (neat) 2958, 2254, 1510, 1255, 908 cm<sup>-1</sup>. <sup>1</sup>H NMR: (500 MHz, CDCl<sub>3</sub>)  $\delta$  7.00 (d, J = 8.5 Hz, 2H), 6.75 (d, J = 8.5 Hz, 2H), 2.31 (td, J = 10.8, 5.6 Hz, 1H), 2.15 (m, 1H), 2.07 (m, 2H), 1.82 (m, 2H), 1.64 (s, 3H), 1.61 (s, 3H), 0.98 (s, 9H), 0.67 (d, J = 6.2 Hz, 3H), 0.19 (s, 6H); <sup>13</sup>C NMR: (125 MHz, CDCl<sub>3</sub>)  $\delta$  153.6, 138.7, 128.3, 125.5, 125.3, 119.7, 47.9, 41.7, 41.6, 34.3, 25.7, 20.0, 18.7, 18.6, 18.2, -4.4. HRMS (ESI) calculated for [C<sub>21</sub>H<sub>34</sub>O<sub>Si</sub>]<sup>+</sup> requires *m/z* 330.2374, found *m/z* 330.2375.

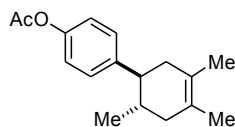

**Chart 1, compound 16.** Experiment 1: Prepared according to the General Procedure using 100.2 mg (0.569 mmol) 1-acetoxy-4-propenylbenzene, 193  $\mu$ L (1.71 mmol) 2,3-dimethyl-1,3-butadiene, 39 mg (0.0170 mmol) Ru(bpz)<sub>3</sub>(BARF)<sub>2</sub>, 7.1 mL CH<sub>2</sub>Cl<sub>2</sub> and an irradiation time of 3 h. Purification by flash column chromatography (50:1 hexanes/EtOAc) afforded 83 mg (0.321 mmol, 56%) of a clear oil. Experiment 2: 99.8 mg (0.566 mmol) 1-acetoxy-4-propenylbenzene, 193  $\mu$ L (1.71 mmol) 2,3-

dimethyl-1,3-butadiene, 39 mg (0.0170 mmol) Ru(bpz)<sub>3</sub>(BARF)<sub>2</sub> and 7.1 mL CH<sub>2</sub>Cl<sub>2</sub>. Isolated 86 mg (0.333, 59% yield, dr: >10:1). IR (neat) 2925, 1756, 1506, 1201 cm<sup>-1</sup>. <sup>1</sup>H NMR: (500 MHz, CDCl<sub>3</sub>)  $\delta$  7.16 (d, J = 8.5 Hz, 2H), 7.00 (d, J = 8.5 Hz, 2H), 2.39 (td, J = 10.1, 5.8 Hz, 1H), 2.29 (s, 3H), 2.12 (m, 3H), 1.88 (m, 1H), 1.80 (m, 1H), 1.64 (s, 3H), 1.61 (s, 3H), 0.70

(d,  $J = 6.2$  Hz, 3H);  $^{13}\text{C}$  NMR: (125 MHz,  $\text{CDCl}_3$ )  $\delta$  169.6, 148.7, 143.6, 128.5, 125.3, 125.3, 121.2, 48.1, 41.5, 41.4, 34.1, 21.2, 20.0, 18.7, 18.6. HRMS (EI) calculated for  $[\text{C}_{17}\text{H}_{22}\text{O}_2]^+$  requires  $m/z$  258.1615, found  $m/z$  258.1613.

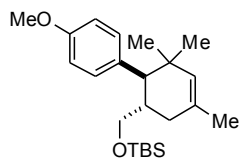

**Chart 1, compound 17.** Experiment 1: Prepared according to the General Procedure using 100.2 mg (0.360 mmol) (*E*)-1-(*tert*-butyldimethylsilyloxy)-3-(4-methoxyphenyl)-2-propene, 140  $\mu\text{L}$  (1.08 mmol) 2,4-dimethyl-1,3-pentadiene, 4.1 mg (0.0018 mmol)  $\text{Ru}(\text{bpz})_3(\text{BArF})_2$ , 4.5 mL  $\text{CH}_2\text{Cl}_2$  and an irradiation time of 2.0 h. Purification by flash column chromatography (gradient, 50:1 to 40:1 to 30:1 hexanes/EtOAc) afforded 125 mg (0.334 mmol, 93%) of a clear oil. Experiment 2: 100.6 mg (0.361 mmol) (*E*)-*tert*-butyl(3-(4-methoxyphenyl)allyloxy)dimethylsilane, 140  $\mu\text{L}$  (1.08 mmol) 2,4-

dimethyl-1,3-pentadiene, 4.1 mg (0.0018 mmol)  $\text{Ru}(\text{bpz})_3(\text{BArF})_2$  and 4.5 mL  $\text{CH}_2\text{Cl}_2$ . Isolated 122 mg (0.326 mmol, 90% yield, dr: >10:1). IR (neat) 2955, 2856, 1512, 1250, 835  $\text{cm}^{-1}$ .  $^1\text{H}$  NMR: (500 MHz,  $\text{CDCl}_3$ )  $\delta$  7.014 (m, 2H), 6.808 (m, 2H), 5.182 (s, 1H), 3.803 (s, 1H), 3.399 (dd,  $J = 9.7, 3.0$  Hz, 1H), 3.176 (dd,  $J = 9.7, 6.4$  Hz, 1H), 2.393 (d,  $J = 11.9$  Hz, 1H), 2.221 (m, 1H), 2.139 (dd,  $J = 17.4, 5.5$  Hz, 1H), 2.040 (dd,  $J = 17.4, 11.3$  Hz, 1H), 1.728 (s, 3H), 0.814 (s, 9H), 0.814 (s, 3H), 0.782 (s, 3H), -0.137 (s, 3H), -0.200 (s, 3H);  $^{13}\text{C}$  NMR: (125 MHz,  $\text{CDCl}_3$ )  $\delta$  157.8, 133.3, 132.9, 132.4, 130.4, 129.1, 112.9, 112.3, 77.2, 77.0, 76.7, 65.7, 55.2, 51.9, 36.2, 36.0, 34.9, 29.7, 25.9, 24.8, 23.5, 18.3, -5.7, -5.7. HRMS (EI) calculated for  $[\text{C}_{23}\text{H}_{38}\text{O}_2\text{SiH}]^+$  requires  $m/z$  375.2714, found  $m/z$  375.2703.

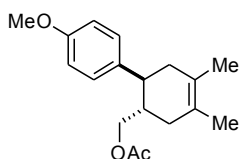

**Chart 1, compound 18.** Experiment 1: Prepared according to the General Procedure using 100.9 mg (0.489 mmol) (*E*)-4-methoxystyryl acetate, 165  $\mu\text{L}$  (1.46 mmol) 2,3-dimethyl-1,3-butadiene, 5.6 mg (0.0024 mmol)  $\text{Ru}(\text{bpz})_3(\text{BArF})_2$ , 6.1 mL  $\text{CH}_2\text{Cl}_2$  and an irradiation time of 4 h. Purification by flash column chromatography (gradient, 50:1 to 10:1 hexanes/EtOAc) afforded 122 mg (0.423 mmol, 87%) of a clear oil. Experiment 2: 100.5 mg (0.487 mmol) (*E*)-4-methoxystyryl acetate, 165  $\mu\text{L}$  (1.46 mmol) 2,3-dimethyl-1,3-butadiene, 5.6 mg (0.0024 mmol)  $\text{Ru}(\text{bpz})_3(\text{BArF})_2$ , 6.1 mL

$\text{CH}_2\text{Cl}_2$ . Isolated 125 mg (0.433 mmol, 89% yield, dr: >10:1). IR (neat) 2901, 2254, 1731, 1513, 1303, 1037  $\text{cm}^{-1}$ .  $^1\text{H}$  NMR: (500 MHz,  $\text{CDCl}_3$ )  $\delta$  7.08 (d,  $J = 8.8$  Hz, 2H), 6.83 (d,  $J = 8.8$  Hz, 2H), 3.89 (dd,  $J = 11.1, 3.7$  Hz, 1H), 3.78 (s, 3H), 3.65 (dd,  $J = 11.1, 7.3$  Hz, 1H), 2.60 (td,  $J = 10.5, 5.9$  Hz, 1H), 2.20 (m, 1H), 2.13 (m, 3H), 1.98 (m, 1H), 1.97 (s, 3H), 1.66 (s, 3H), 1.63 (s, 3H);  $^{13}\text{C}$  NMR: (125 MHz,  $\text{CDCl}_3$ )  $\delta$  171.1, 158.1, 136.4, 128.3, 125.3, 124.4, 113.9, 67.4, 55.2, 42.7, 41.0, 38.7, 35.7, 20.8, 18.8, 18.6. HRMS (EI) calculated for  $[\text{C}_{18}\text{H}_{24}\text{O}_3]^+$  requires  $m/z$  288.1720, found  $m/z$  288.1728.

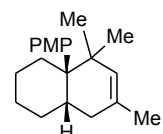

**Chart 1, compound 19.** Experiment 1: Prepared according to the General Procedure using 100.3 mg (0.533 mmol) 1-(4-methoxyphenyl)cyclohexene, 206  $\mu\text{L}$  (1.59 mmol) 2,4-dimethyl-1,3-pentadiene, 6.1 mg (0.0027 mmol)  $\text{Ru}(\text{bpz})_3(\text{BArF})_2$ , 6.6 mL  $\text{CH}_2\text{Cl}_2$  and an irradiation time of 20 h. Purification by flash column chromatography (gradient, 50:1 to 40:1 hexanes/EtOAc) afforded 140 mg (0.492 mmol, 92%) of a clear oil.

Experiment 2: 100.5 mg (0.534 mmol) 1-(4-methoxyphenyl)cyclohexene, 206  $\mu\text{L}$  (1.59 mmol) 2,4-dimethyl-1,3-pentadiene, 6.1 mg (0.0027 mmol)  $\text{Ru}(\text{bpz})_3(\text{BArF})_2$  and 6.6 mL  $\text{CH}_2\text{Cl}_2$ . Isolated 138 mg (0.485 mmol, 91% yield, dr: >10:1). IR (neat) 2945, 2834, 1514, 1251, 1040  $\text{cm}^{-1}$ .  $^1\text{H}$  NMR: (500 MHz,  $\text{CDCl}_3$ )  $\delta$  7.274 (d,  $J = 8.2$  Hz, 1H), 7.233 (d,  $J = 9.3$  Hz, 1H), 6.850 (d,  $J = 8.2$  Hz, 2H), 5.099 (s, 1H), 3.805 (s, 3H), 2.790 (m, 1H), 2.293 (dd,  $J = 18.0, 10.3$  Hz, 1H), 2.083 (d,  $J = 13.9$  Hz, 1H), 1.935 (dd,  $J = 18.0, 6.7$  Hz, 1H), 1.679 (s, 3H), 1.645 (m, 1H), 1.553 (m, 2H), 1.426 (m, 1H), 1.236 (m, 3H), 0.787 (s, 1H), 0.511 (s, 1H);  $^{13}\text{C}$  NMR: (125 MHz,  $\text{CDCl}_3$ )  $\delta$  157.0, 134.1, 132.2, 130.6, 130.2, 128.4, 112.5, 112.3, 55.0, 45.1, 38.7, 32.2, 30.3, 28.4, 26.0, 24.6, 24.1, 23.1, 21.7, 19.5. HRMS (EI) calculated for  $[\text{C}_{20}\text{H}_{28}\text{O}_2]^+$  requires  $m/z$  284.2135, found  $m/z$  284.2124.

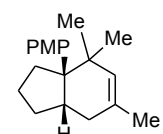

**Chart 1, compound 20.** Prepared according to the General Procedure using 100.6 mg (0.577 mmol) 1-(4-methoxyphenyl)cyclopentene, 223  $\mu\text{L}$  (1.73 mmol) 2,4-dimethyl-1,3-pentadiene, 6.6 mg (0.0029 mmol)  $\text{Ru}(\text{bpz})_3(\text{BArF})_2$ , 7.2 mL  $\text{CH}_2\text{Cl}_2$  and an irradiation time of 1.5 h. Purification by flash column chromatography (gradient, 50:1 to 40:1 hexanes/EtOAc) afforded 131 mg (0.484 mmol, 84%) of a clear oil.

Experiment 2: 100.2 mg (0.575 mmol) 1-(4-methoxyphenyl)cyclopentene, 223  $\mu\text{L}$  (1.73 mmol) 2,4-dimethyl-1,3-pentadiene, 6.6 mg (0.0029 mmol)  $\text{Ru}(\text{bpz})_3(\text{BArF})_2$  and 7.2 mL  $\text{CH}_2\text{Cl}_2$ . Isolated 132 mg (0.488 mmol, 85% yield, dr: >10:1). IR (neat) 2958, 287, 1513, 1251  $\text{cm}^{-1}$ .  $^1\text{H}$  NMR: (500 MHz,  $\text{CDCl}_3$ )  $\delta$  7.34 (d,  $J = 9.2$  Hz, 2H), 6.83 (d,  $J = 9.2$  Hz, 2H), 5.13 (m, 1H), 3.80 (s, 3H), 2.75 (dd,  $J = 13.9, 6.4$  Hz, 1H), 2.14 (m, 2H), 1.73 (m, 1H), 1.68 (m, 2H), 1.65 (s, 3H), 1.46 (m, 1H), 1.28 (m, 1H), 1.24 (m, 1H), 0.88 (s, 3H), 0.57 (s, 3H);  $^{13}\text{C}$  NMR: (125 MHz,  $\text{CDCl}_3$ )  $\delta$  157.3, 135.5, 132.2, 129.3, 127.9, 112.5, 55.1, 54.9, 37.0, 37.0, 35.2, 30.3, 30.1, 29.8, 26.0, 23.2, 19.8. HRMS (EI) calculated for  $[\text{C}_{19}\text{H}_{26}\text{O}]^+$  requires  $m/z$  270.1979, found  $m/z$  270.1970.

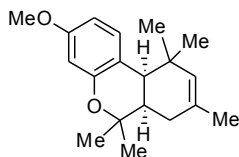

**Chart 1, compound 21.** Experiment 1: Prepared according to the General Procedure using 101.2 mg (0.532 mmol) precocene I, 204  $\mu\text{L}$  (1.58 mmol) 2,4-dimethyl-1,3-pentadiene, 36 mg (0.0158 mmol)  $\text{Ru}(\text{bpz})_3(\text{BArF})_2$ , 6.6 mL of  $\text{CH}_2\text{Cl}_2$  and an irradiation time of 48 h. Purification by flash column chromatography (2:1 hexanes/ $\text{CH}_2\text{Cl}_2$ ) yielded 60% of cycloadduct as determined by  $^1\text{H}$  NMR using  $\text{CH}_2\text{Br}_2$  as a calibrated internal standard. Experiment 2: Prepared according to the

General Procedure using 106.1 mg (0.558 mmol) precocene I, 204  $\mu\text{L}$  (1.58 mmol) 2,4-dimethyl-1,3-pentadiene, 36 mg (0.0158 mmol)  $\text{Ru}(\text{bpz})_3(\text{BArF})_2$  and 6.6 mL of  $\text{CH}_2\text{Cl}_2$ . Yielded 64% of cycloadduct as determined by  $^1\text{H}$  NMR, dr: >10:1. IR (neat) 3039, 2975, 2836, 1504, 1159  $\text{cm}^{-1}$ .  $^1\text{H}$  NMR: (500 MHz,  $\text{CDCl}_3$ )  $\delta$  7.26 (d,  $J$  = 8.2 Hz, 1H), 6.41 (m, 2H), 5.18 (m, 1H), 3.75 (s, 3H), 2.74 (d,  $J$  = 4.9 Hz, 1H), 2.23 (td,  $J$  = 6.9, 5.2 Hz, 1H), 2.02 (dd,  $J$  = 17.5, 6.9 Hz, 1H), 1.78 (dd,  $J$  = 17.5, 6.7 Hz, 1H), 1.60 (s, 3H), 1.36 (s, 3H), 1.31 (s, 3H), 1.17 (s, 3H), 1.14 (s, 3H);  $^{13}\text{C}$  NMR: (125 MHz,  $\text{CDCl}_3$ )  $\delta$  158.8, 155.7, 130.8, 130.1, 129.6, 118.9, 106.2, 102.7, 78.6, 55.1, 42.0, 40.2, 35.5, 33.5, 29.6, 29.3, 27.5, 25.4, 23.5. HRMS (EI) calculated for  $[\text{C}_{21}\text{H}_{30}\text{O}_2]^+$  requires  $m/z$  286.1928, found  $m/z$  286.1938.

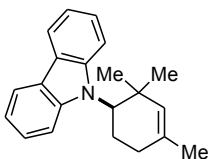

**Chart 1, compound 22.** Experiment 1: Prepared according to the General Procedure using 100.2 mg (0.519 mmol) 9-vinylcarbazole, 201  $\mu\text{L}$  (1.55 mmol) 2,4-dimethyl-1,3-pentadiene, 36 mg (0.0155 mmol)  $\text{Ru}(\text{bpz})_3(\text{BArF})_2$ , 6.5 mL  $\text{CH}_2\text{Cl}_2$  and an irradiation time of 24 h. Purification by flash column chromatography (50:1 hexanes/ $\text{EtOAc}$ ) afforded 96 mg (0.332 mmol, 64%) of a clear oil. Experiment 2: 100.8 mg (0.522 mmol) of *trans*-anethole, 201  $\mu\text{L}$  (1.55 mmol) 2,4-dimethyl-1,3-pentadiene, 36 mg (0.0155 mmol)  $\text{Ru}(\text{bpz})_3(\text{BArF})_2$  and 6.5 mL  $\text{CH}_2\text{Cl}_2$ . Isolated 100 mg (0.346 mmol, 66% yield, dr:

>10:1. IR (neat) 3060, 2963, 1451, 1195, 909  $\text{cm}^{-1}$ .  $^1\text{H}$  NMR: (500 MHz,  $\text{CDCl}_3$ )  $\delta$  8.08 (dd,  $J$  = 7.6, 6.4 Hz, 2H), 7.67 (d,  $J$  = 8.8 Hz, 1H), 7.48 (d,  $J$  = 8.8 Hz, 1H), 7.42 (t,  $J$  = 7.6 Hz, 1H), 7.34 (t,  $J$  = 7.6 Hz, 1H), 7.19 (m, 2H), 5.27 (s, 1H), 4.60 (dd,  $J$  = 13.5, 2.0 Hz, 1H), 2.97 (qd,  $J$  = 12.7, 5.6 Hz, 1H), 2.27 (m, 1H), 2.17 (m, 1H), 1.91 (m, 1H), 1.75 (s, 3H), 1.17 (s, 3H), 1.06 (s, 3H);  $^{13}\text{C}$  NMR: (125 MHz,  $\text{CDCl}_3$ )  $\delta$  142.6, 140.6, 132.8, 131.3, 125.4, 124.9, 124.0, 122.9, 119.9, 119.7, 118.7, 118.5, 113.6, 110.2, 62.4, 40.2, 32.2, 29.9, 25.9, 25.3, 23.3. HRMS (EI) calculated for  $[\text{C}_{21}\text{H}_{23}\text{N}]^+$  requires  $m/z$  289.1825, found  $m/z$  189.1828.

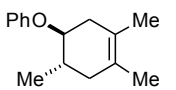

**Chart 1, compound 23.** Experiment 1: Prepared according to the General Procedure using 100.4 mg (0.748 mmol) (*E*)-(1-propenyloxy)benzene, 253  $\mu\text{L}$  (2.24 mmol) 2,3-dimethyl-1,3-butadiene, 8.6 mg (0.0037 mmol)  $\text{Ru}(\text{bpz})_3(\text{BArF})_2$ , 9.3 mL  $\text{CH}_2\text{Cl}_2$  and an irradiation time of 20 h. Purification by flash column chromatography (40:1 hexanes/ $\text{EtOAc}$ ) yielded 43% of cycloadduct as determined by  $^1\text{H}$  NMR using  $\text{CH}_2\text{Br}_2$  as a calibrated internal standard. Experiment 2: 100.1 mg (0.746 mmol) (*E*)-(1-propenyloxy)benzene, 253  $\mu\text{L}$  (2.24 mmol) 2,3-dimethyl-1,3-butadiene, 8.6 mg (0.0037 mmol)  $\text{Ru}(\text{bpz})_3(\text{BArF})_2$  and 9.3 mL  $\text{CH}_2\text{Cl}_2$ . Yielded 41 % of cycloadduct as determined by  $^1\text{H}$  NMR, dr: >10:1. IR (neat) 2956, 2909, 1494, 1245  $\text{cm}^{-1}$ .  $^1\text{H}$  NMR: (500 MHz,  $\text{CDCl}_3$ )  $\delta$  7.26 (m, 2H), 6.93 (d,  $J$  = 8.1 Hz, 3H), 4.10 (td,  $J$  = 8.1, 5.4 Hz, 1H), 2.41 (dd,  $J$  = 16.8, 4.3 Hz, 1H), 2.19 (dd,  $J$  = 16.8, 4.3 Hz, 1H), 2.09 (m, 1H), 2.01 (m, 1H), 1.80 (m, 1H), 1.62 (s, 3H), 1.60 (s, 3H), 1.04 (d,  $J$  = 6.4 Hz, 3H);  $^{13}\text{C}$  NMR: (125 MHz,  $\text{CDCl}_3$ )  $\delta$  158.6, 129.4, 124.9, 122.7, 120.5, 116.2, 116.0, 78.8, 39.3, 36.8, 34.0, 18.8, 18.5, 17.8. HRMS (EI) calculated for  $[\text{C}_{15}\text{H}_{20}\text{O}]^+$  requires  $m/z$  216.1509, found  $m/z$  216.1515.

**Large-scale solar cycloaddition (Table 2, entry 4).** A 250 mL round-bottom flask was charged with 2.01 g (13.6 mmol) *trans*-anethole, 31 mg (0.013 mmol)  $\text{Ru}(\text{bpz})_3(\text{BArF})_2$ , 4.1 mL (41.0 mmol) isoprene, and 250 mL  $\text{CH}_2\text{Cl}_2$ . The reaction was stirred in a laboratory window for 2 h. The reaction mixture was concentrated and passed through a short pad of silica with  $\text{EtOAc}$ . The solvent was removed by rotary evaporation to afford 2.79 g (12.9 mmol, 95% yield, dr >10:1) of analytically pure cycloadduct.

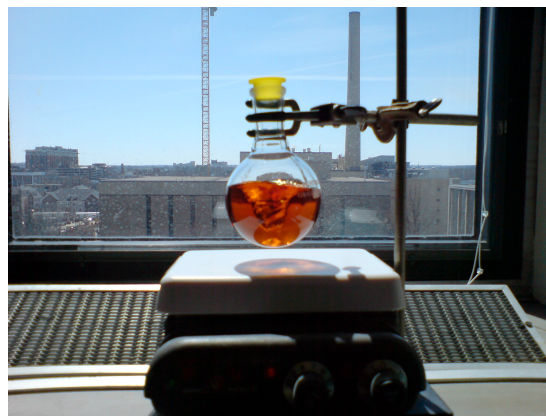

## V. Studies on the synthesis of heitziamide A

**Thermal cycloaddition of fagaramide and myrcene.** Fagaramide (500 mg, 2.02 mmol) and myrcene (7.0 mL, 40.6 mmol) were placed together in a sealed tube and heated to 150 °C. After 72 h, the reaction mixture was passed through a plug of SiO<sub>2</sub> eluting with 10:1 hexanes:ethyl acetate. The solvent was removed by rotary evaporation, and the residue was purified by flash column chromatography (gradient, 10:1 to 3:1 hexanes/EtOAc) to afford 465 mg (1.21 mmol, 60% yield) of the “thermal” regioisomer (**32**) as a 2:1 mixture of *trans*:*cis* diastereomers.

*Trans* diastereomer: IR (neat) 3053, 2986, 2914, 1723, 1520, 1265 cm<sup>-1</sup>. <sup>1</sup>H NMR: (600 MHz, C<sub>6</sub>D<sub>6</sub>) δ 6.88 (d, J = 1.5 Hz, 1H), 6.74 (dd, J = 8.2, 1.5 Hz, 1H), 6.71 (d, J = 8.2 Hz, 1H), 5.79 (t, J = 5.8 Hz, 1H), 5.50 (s, 1H), 5.40 (dd, J = 7.6, 1.5 Hz, 2H), 5.25 (t, J = 7.1 Hz, 1H), 3.17 (dt, J = 11.3, 8.9 Hz, 1H), 3.11 (m, 1H), 2.77 (m, 1H), 2.61 (ddd, J = 12.5, 7.1, 5.3 Hz, 1H), 2.35 (m, 1H), 2.30 (dt, J = 17.2, 5.1 Hz, 1H), 2.18 (m, 4H), 2.04 (m, 2H), 1.69 (s, 3H), 1.58 (s, 3H), 1.42 (m, J = 6.5 Hz, 1H), 0.63 (d, J = 6.5 Hz, 3H), 0.61 (d, J = 6.5 Hz, 3H); <sup>13</sup>C NMR: (150 MHz, C<sub>6</sub>D<sub>6</sub>) δ 173.9, 147.8, 146.3, 138.8, 136.8, 131.1, 128.0, 127.9, 121.2, 119.4, 108.1, 108.1, 100.5, 48.0, 46.5, 43.2, 37.5, 37.3, 30.2, 28.5, 26.5, 25.5, 19.7, 17.5. HRMS (ESI) calculated for [C<sub>24</sub>H<sub>33</sub>NO<sub>3</sub>]<sup>+</sup> requires *m/z* 383.2455, found *m/z* 383.2471.

*Cis* diastereomer: IR (neat) 3053, 2966, 2915, 1666, 1519, 1268 cm<sup>-1</sup>. <sup>1</sup>H NMR: (500 MHz, CDCl<sub>3</sub>) δ 6.71 (m, 2H), 6.68 (dd, J = 8.0, 1.6 Hz, 1H), 5.90 (d, J = 1.5 Hz, 1H), 5.89 (d, J = 1.5 Hz, 1H), 5.47 (s, 1H), 5.19 (t, J = 5.18 Hz, 1H), 5.11 (m, 1H), 2.93 (m, 2H), 2.71 (ddd, J = 13.2, 7.0, 5.5 Hz, 1H), 2.52 (m, 1H), 2.40 (td, J = 10.9, 4.8 Hz, 1H), 2.31 (dt, J = 17.4, 4.8 Hz, 1H), 2.16 (m, 4H), 2.01 (m, 2H), 1.70 (s, 3H), 1.61 (s, 3H), 1.41 (m, J = 6.7 Hz, 1H), 0.66 (d, J = 6.7 Hz, 3H), 0.64 (d, J = 6.7 Hz, 3H); <sup>13</sup>C NMR: (125 MHz, CDCl<sub>3</sub>) δ 174.4, 147.6, 146.0, 138.3, 136.4, 131.7, 124.1, 120.8, 119.8, 108.3, 107.6, 100.8, 49.4, 46.6, 42.7, 37.4, 33.6, 32.7, 28.3, 26.3, 25.7, 19.8, 17.7. HRMS (ESI) calculated for [C<sub>24</sub>H<sub>33</sub>NO<sub>3</sub>]<sup>+</sup> requires *m/z* 383.2455, found *m/z* 383.2438.

### Additional NMR experimental notes for compound **32**

- NOESY1D spectra (summarized on S-60) – Varian’s standard NOESY1D Chempack sequence was used with a typical setup as follows: mix=0.7×T<sub>1</sub>(shortest)~0.5s, d1=3×T<sub>1</sub>(longest)~5.4s, nt=16, ss=-2, selective pulse using a seduce shape. The numbers shown are % enhancements measured as ratios of integrals, normalized by number of protons involved, of the enhanced to selected protons ×(-1).
- gcosy spectrum (S-61) – 90°-90° gradient cosy with: d1=1.8 nt=2 np=2048 ni=512 fn=fn1=4096, referenced to TMS, sinebell apodization, symmetrized.
- HSQC spectrum (S-62) – Varian’s standard HSQC Chempack sequence setup as follows: nt=2 ss=128 np=2048 at=0.198 ni=512 j1xh=140 fn=fn1=4096, 4× linear prediction applied in F1; cosine-squared apodization. The experiment was run in multiplicity-edited mode (mult=2) with red contours denoting -CH<sub>2</sub>- correlations.
- HMBC spectrum (S-63) – Varian’s standard gHMBC Chempack sequence setup as follows: nt=8 ss=128 np=2048 ni=800 j1xh=140 jnxh=8.0 fn=4096 fn1=8192, sinebell apodization, 2× linear prediction in F1.

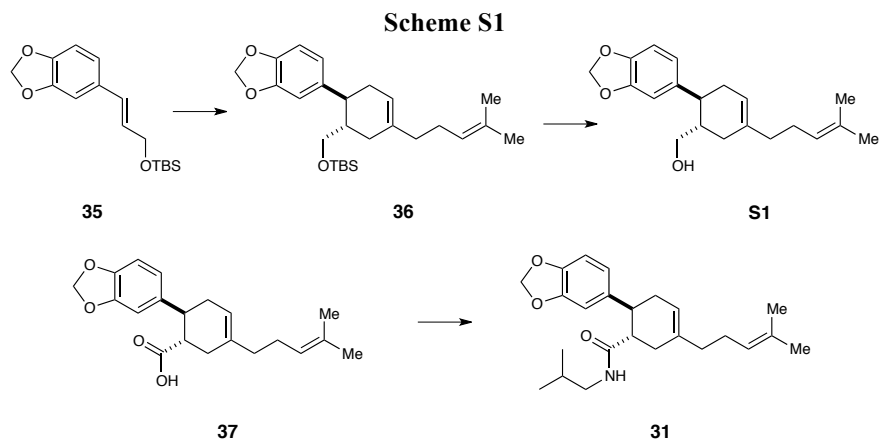

**Compound 35.** A 25 mL round-bottomed flask was charged with trans-3,4-methylenedioxcinnamyl alcohol<sup>17</sup> (1.5 g, 8.42 mmol), *tert*-butyldimethylsilyl chloride (1.91 g, 12.7 mmol), imidazole (1.15 g, 16.9 mmol) and 4.5 mL DMF. After 5 h, the reaction was diluted with water and Et<sub>2</sub>O. The phases were separated, and the aqueous phase was extracted two additional times with Et<sub>2</sub>O. The combined organic layers were washed with brine, dried over MgSO<sub>4</sub>, and concentrated by rotary evaporation. Flash column chromatography (gradient, 50:1 to 20:1 hexanes/EtOAc) afforded 2.36 g (8.07 mmol, 96% yield) a white solid. All spectroscopic data were consistent with reported values.<sup>18</sup>

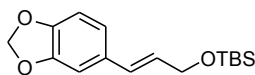

**Comparison study using aminium cation initiator [(4-BrPh)<sub>3</sub>N]SbCl<sub>6</sub>.**

A 25 mL round-bottomed flask was charged with 100.5 mg (0.344 mmol) of **35**, 300  $\mu$ L (1.74 mmol) of myrcene, 6.0 mg (0.0068 mmol) of [(4-BrPh)<sub>3</sub>N]SbCl<sub>6</sub> and 6.8 mL of CH<sub>2</sub>Cl<sub>2</sub>. After 15 h, the reaction was passed through a short pad of silica using EtOAc as eluent. The solvent was removed by rotary evaporation. No cycloadduct could be detected by <sup>1</sup>H NMR analysis of the reaction mixture using CH<sub>2</sub>Br<sub>2</sub> as a calibrated internal standard.

**Comparison study using triphenylpyrrilium tetrafluoroborate.**

A solution of **35** (100.7 mg, 0.344 mmol) in 6.8 mL MeNO<sub>2</sub> was placed in a 25 mL round-bottomed flask. In a dark hood, myrcene (300  $\mu$ L, 1.74 mmol), AcOH (40  $\mu$ L, 0.699 mmol), MgSO<sub>4</sub> (200 mg) and triphenylpyrrilium tetrafluoroborate (4.2 mg, 0.0068 mmol) were added to the flask. The reaction was stirred at ambient temperature in front of a 23 W CFL bulb. After 15 h, the reaction was eluted through a short pad of silica using EtOAc. The solvent was removed by rotary evaporation. <sup>1</sup>H NMR analysis of the reaction mixture showed 8% conversion to the cycloadduct using CH<sub>2</sub>Br<sub>2</sub> as a calibrated internal standard.

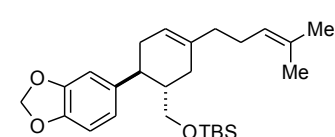

**Compound 36.** A solution of **35** (100.3 mg, 0.343 mmol) in 6.8 mL MeNO<sub>2</sub> was placed in a 25 mL round-bottomed flask. In a dark hood, myrcene (300  $\mu$ L, 1.74 mmol), AcOH (40  $\mu$ L, 0.699 mmol) and Ru(bpz)<sub>3</sub>(PF)<sub>2</sub> (5.9 mg, 0.0068 mmol) were added to the flask. The reaction was stirred at ambient temperature in front of a 23 W CFL bulb. After 15 h, the reaction was eluted through a short pad of silica using EtOAc, and the filtrate was concentrated by rotary evaporation. Purification by flash column chromatography (gradient, 50:1 to 10:1 hexanes/EtOAc) afforded 118 mg (0.275 mmol, 80%) of a clear oil. IR (neat) 2957, 2857, 2253, 1472, 1250 cm<sup>-1</sup>. <sup>1</sup>H NMR: (500 MHz, CDCl<sub>3</sub>)  $\delta$  6.65 (d, J = 7.8 Hz, 1H), 6.62 (d, J = 1.6 Hz, 1H), 6.57 (dd, J = 7.8, 1.6 Hz, 1H), 5.85 (d, J = 1.4 Hz, 1H), 5.84 (d, J = 1.4 Hz, 1H), 5.36 (s, 1H), 5.06 (t, J = 7.1 Hz, 1H), 3.30 (dd, J = 10.1, 3.5 Hz, 1H), 3.16 (dd, J = 10.1, 6.4 Hz, 1H), 2.53 (td, J = 10.6, 5.5 Hz, 1H), 2.13 (m, 1H), 2.05 (m, 5H), 1.95 (m, 2H), 1.81 (m, 1H), 1.63 (s, 3H), 1.55 (s, 3H), 0.79 (s, 9H), -0.13 (s, 3H), -0.16 (s, 3H); <sup>13</sup>C NMR: (125 MHz, CDCl<sub>3</sub>)  $\delta$  147.4, 145.5, 139.4, 137.4, 131.3, 124.3, 120.7, 119.7, 107.9, 107.7, 100.6, 65.0, 41.9, 41.4, 37.6, 34.4, 32.0, 26.4, 25.8, 25.6, 18.2, 17.6, 0.9, -5.6. HRMS (EI) calculated for [C<sub>26</sub>H<sub>40</sub>O<sub>3</sub>Si]<sup>+</sup> requires *m/z* 428.2742, found *m/z* 428.2751.

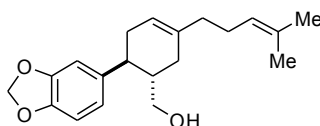

**Compound S1.** A solution of **36** (640 mg, 1.49 mmol) in dry THF (7.5 mL) was placed in a 25 mL round-bottomed flask. The vessel was cooled to 0  $^{\circ}$ C, TBAF (1.17 g, 4.47 mmol) was added, and the reaction mixture was gradually warmed to room temperature. After 2 h, the reaction was concentrated by rotary evaporation. Flash column chromatography (gradient, 30:1 to 3:1 hexanes/EtOAc) afforded 360 mg (1.14 mmol, 76% yield) of a clear oil. IR (neat) 3436, 2899, 1505, 1245, 909 cm<sup>-1</sup>. <sup>1</sup>H NMR: (500 MHz, CDCl<sub>3</sub>)  $\delta$  6.74 (d, J = 7.7 Hz, 1H), 6.71 (d, J = 1.7 Hz, 1H), 6.67 (dd, J = 7.7, 1.7 Hz, 1H), 5.93 (s, 2H), 5.46 (bs, 1H), 5.13 (t, J = 7.1 Hz, 1H), 3.46 (dd, J = 10.8, 3.9 Hz, 1H), 3.34 (dd, J = 10.8, 5.8 Hz, 1H), 2.55 (td, J = 10.8, 6.0 Hz, 1H), 2.26 (m, 1H), 2.15 (m, 4H), 2.02 (m, 3H), 1.96 (m, 1H), 1.70 (s, 3H), 1.62 (s, 3H); <sup>13</sup>C NMR: (125 MHz, CDCl<sub>3</sub>)  $\delta$  147.8, 145.9, 138.9, 137.0, 131.5, 124.2, 120.5, 120.0, 108.3, 107.6, 100.8, 65.9, 42.9, 41.5, 37.5, 34.6, 32.2, 26.4, 25.7, 17.7. HRMS (ESI) calculated for [C<sub>20</sub>H<sub>26</sub>O<sub>3</sub>]<sup>+</sup> requires *m/z* 314.1877, found *m/z* 314.1875.

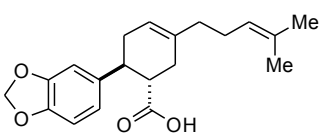

**Compound 37.** A mixture of **S1** (360 mg, 1.14 mmol), *N*-methylmorpholine *N*-oxide (200 mg, 1.71 mmol), tetrapropylammonium perruthenate (41 mg, 0.117 mmol), 4  $\text{\AA}$  molecular sieves (576 mg), and 4.6 mL dry CH<sub>2</sub>Cl<sub>2</sub> was placed in a 25 mL round-bottomed flask. After 1 h, the reaction mixture was poured directly onto a silica gel column and eluted with CH<sub>2</sub>Cl<sub>2</sub>. The filtrates were combined and solvent removed to afford 286 mg (0.92 mmol,



80% yield) of (1*S*,6*S*)-6-(benzo[*d*][1,3]dioxol-5-yl)-3-(4-methylpent-3-en-1-yl)cyclohex-3-enecarbaldehyde as a clear oil, which was used in the next step without any further purification.

The aldehyde (250 mg, 0.80 mmol), 6.8 mL *t*-butanol, and 2-methyl-2-butene (4.1 mL, 38.7 mmol) were placed in a 10 mL round-bottomed flask. The flask was cooled to 0 °C, and a solution of NaClO<sub>2</sub> (681 mg, 7.53 mmol) and NaH<sub>2</sub>PO<sub>4</sub> (658 mg, 5.48 mmol) dissolved in 1.8 mL H<sub>2</sub>O was added. After 2 h, the volatile solvents were removed and mixture dissolved in 25 mL H<sub>2</sub>O, which was acidified to pH 3 with aqueous 1 M HCl. The acidified aqueous phase was then extracted three times with Et<sub>2</sub>O. The combined organic phase was dried over anhydrous MgSO<sub>4</sub> and concentrated by rotary evaporation. Flash column chromatography (gradient, 30:1 to 1:1 hexanes/EtOAc) afforded 200 mg (0.61 mmol, 76% yield) of the carboxylic acid **37** as a clear oil. IR (neat) 3583, 3154, 2903, 1706, 1379 cm<sup>-1</sup>. <sup>1</sup>H NMR: (500 MHz, CDCl<sub>3</sub>) δ 6.71 (d, *J* = 4.8 Hz, 1H), 6.70 (d, *J* = 1.4 Hz, 1H), 6.66 (dd, *J* = 8.1, 1.4 Hz, 1H), 5.93 (d, *J* = 1.2 Hz, 1H), 5.91 (d, *J* = 1.2 Hz, 1H), 5.47 (s, 1H), 5.10 (tt, *J* = 6.6, 1.2 Hz, 1H), 2.92 (td, *J* = 10.7, 5.6 Hz, 1H), 2.80 (td, *J* = 10.7, 5.6 Hz, 1H), 2.32 (m, 3H), 2.13 (m, 3H), 2.01 (t, *J* = 7.0 Hz, 2H), 1.70 (s, 3H), 1.61 (s, 3H); <sup>13</sup>C NMR: (125 MHz, CDCl<sub>3</sub>) δ 179.7, 147.7, 146.1, 137.7, 135.6, 131.7, 123.9, 120.4, 120.1, 108.1, 107.7, 100.9, 46.1, 42.0, 37.2, 33.7, 32.2, 26.3, 25.7, 17.7. HRMS (ESI) calculated for [C<sub>20</sub>H<sub>23</sub>O<sub>4</sub>]<sup>-</sup> requires *m/z* 327.1591, found *m/z* 327.1587.

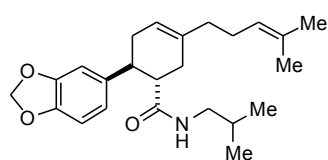

**Heitziamide A (31)** A solution of **37** (100.6 mg, 0.306 mmol), EDC•HCl (60 mg, 0.313 mmol), DMAP (4 mg, 0.033 mmol), and isobutylamine (90 μL, 0.91 mmol) in 2.0 mL CH<sub>2</sub>Cl<sub>2</sub> was placed in a 10 mL round-bottomed flask. After 12 h, the solvent was removed by rotary evaporation. Flash column chromatography (gradient, 30:1 to 4:1 hexanes/EtOAc) afforded 95 mg (0.25 mmol, 81% yield) of a white solid. All spectroscopic data were consistent with values reported in the isolation report for heitziamide A.<sup>19</sup> <sup>1</sup>H NMR: (500

MHz, CDCl<sub>3</sub>) δ 6.72 (d, *J* = 1.6 Hz, 1H), 6.71 (d, *J* = 8.0 Hz, 1H), 6.68 (dd, *J* = 8.0, 1.6 Hz, 1H), 5.89 (d, *J* = 1.3 Hz, 1H), 5.88 (d, *J* = 1.3 Hz, 1H), 5.47 (s, 1H), 5.32 (t, *J* = 5.7 Hz, 1H), 5.11 (t, *J* = 6.9 Hz, 1H), 2.96 (m, 1H), 2.91 (td, *J* = 11.1, 5.7 Hz, 1H), 2.70 (m, 1H), 2.52 (m, 1H), 2.43 (td, *J* = 17.0, 5.0 Hz, 1H), 2.30 (m, 1H), 2.22 (m, 1H), 2.11 (m, 3H), 2.01 (m, 2H), 1.69 (s, 3H), 1.61 (s, 3H), 1.41 (m, 1H), 0.66 (d, *J* = 6.6 Hz, 3H), 0.64 (d, *J* = 6.6 Hz, 3H); <sup>13</sup>C NMR: (125 MHz, CDCl<sub>3</sub>) δ 174.4, 147.6, 146.0, 138.3, 136.3, 131.7, 124.1, 120.8, 119.8, 108.3, 107.7, 100.8, 49.3, 46.6, 42.7, 37.4, 33.7, 32.7, 28.3, 26.3, 25.7, 19.8, 17.7. HRMS (ESI) calculated for [C<sub>24</sub>H<sub>33</sub>NO<sub>3</sub>Na]<sup>+</sup> requires *m/z* 406.2353, found *m/z* 406.2357.

## VI. Representative NOEs

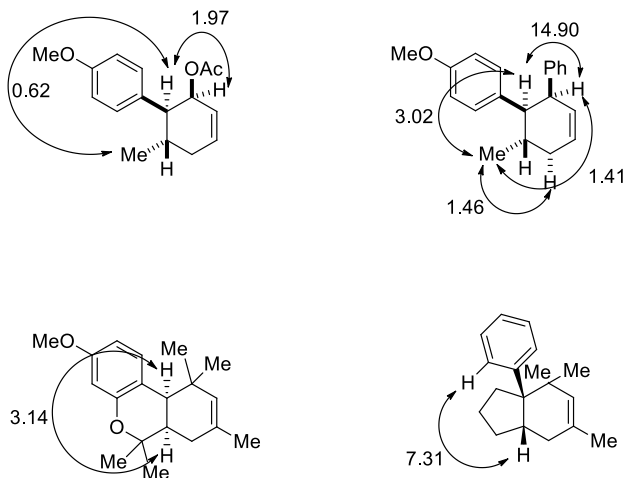

## VII. References

- <sup>1</sup> Ischay, M. A.; Lu, Z.; Yoon, T. P. *J. Am. Chem. Soc.* **2010**, *132*, 8572–8574.
- <sup>2</sup> Rillema, D. P.; Allen, G.; Meyer, T. J.; Conrad, D. *Inorg. Chem.* **1983**, *22*, 1617–1622.
- <sup>3</sup> Krijnen, E. S.; Zuilhof, H.; Lodder, G. *J. Org. Chem.* **1994**, *59*, 8139–8150.
- <sup>4</sup> Rodriguez, J.; Waegell, B. *Synthesis* **1988**, 534–535.
- <sup>5</sup> Yanagisawa, A.; Nezu, T.; Mohri, S.-I. *Org. Lett.* **2009**, *11*, 5286–5289.
- <sup>6</sup> Engler, T. A.; Chai, W.; LaTessa, K. O. *J. Org. Chem.* **1996**, *61*, 9297–9308.
- <sup>7</sup> Seki, M.; Mori, K. *Eur. J. Org. Chem.* **1999**, 2965–2967.
- <sup>8</sup> Angle, S. R.; Arnaiz, D. O. *J. Org. Chem.* **1992**, *57*, 5973–5947.
- <sup>9</sup> Ueno, S.; Hartwig, J. F. *Angew. Chem. Int. Ed.* **2008**, *47*, 1928–1931.
- <sup>10</sup> Crivello, J. V.; Kong, S. *J. Org. Chem.* **1998**, *63*, 6745–6748.
- <sup>11</sup> Tallineau, J.; Bashiardes, G.; Coustard, J.-M.; Lecornué, F. *Synlett* **2009**, 2761–2764.
- <sup>12</sup> Pangborn, A. B.; Giardello, M. A.; Grubbs, R. H.; Rosen, R. K.; Timmers, F. J. *Organometallics* **1996**, *15*, 1518–1520.
- <sup>13</sup> Fort, Y.; Becker, S.; Caubère, P. *Tetrahedron* **1994**, *50*, 11893–11902.
- <sup>14</sup> Ross, H. B.; Boldaji, M. R.; Rillema, D. P.; Blanton, C. B.; White, R. P. *Inorg. Chem.* **1989**, *28*, 1013–1021.
- <sup>15</sup> Yakelis, N. A.; Bergman, R. G. *Organometallics* **2005**, *24*, 3579–3581.
- <sup>16</sup> Bauld, N. L.; Gao, D. *J. Chem. Soc., Perkin Trans.2* **2000**, 931–934.
- <sup>17</sup> Angle, S. R.; Choi, I.; Tham, F. S. *J. Org. Chem.* **2008**, *73*, 6268–6278.
- <sup>18</sup> Wirth, T.; Kulicke, K. J.; Fragale, G. *J. Org. Chem.* **1996**, *61*, 2686–2689.
- <sup>19</sup> Mbaze, L. M.; Lado, J. A.; Wansi, J. D.; Shiao, T. C.; Chiozem, D. D.; Mesaik, M. A.; Choudhary, M. I.; Lacaille-Dubois, M.-A.; Wandji, J.; Roy, R.; Sewald, N. *Phytochemistry* **2009**, *70*, 1442–1447.

9.783  
9.781

8.649  
8.643

7.834  
7.832  
7.828  
7.825  
7.701  
7.697  
7.668

1.950  
1.945  
1.940  
1.935  
1.929

$\text{Ru}(\text{bpz})_3(\text{BArF})_2$   
 $^1\text{H}$  NMR  
500 MHz  
 $\text{CD}_3\text{CN}$

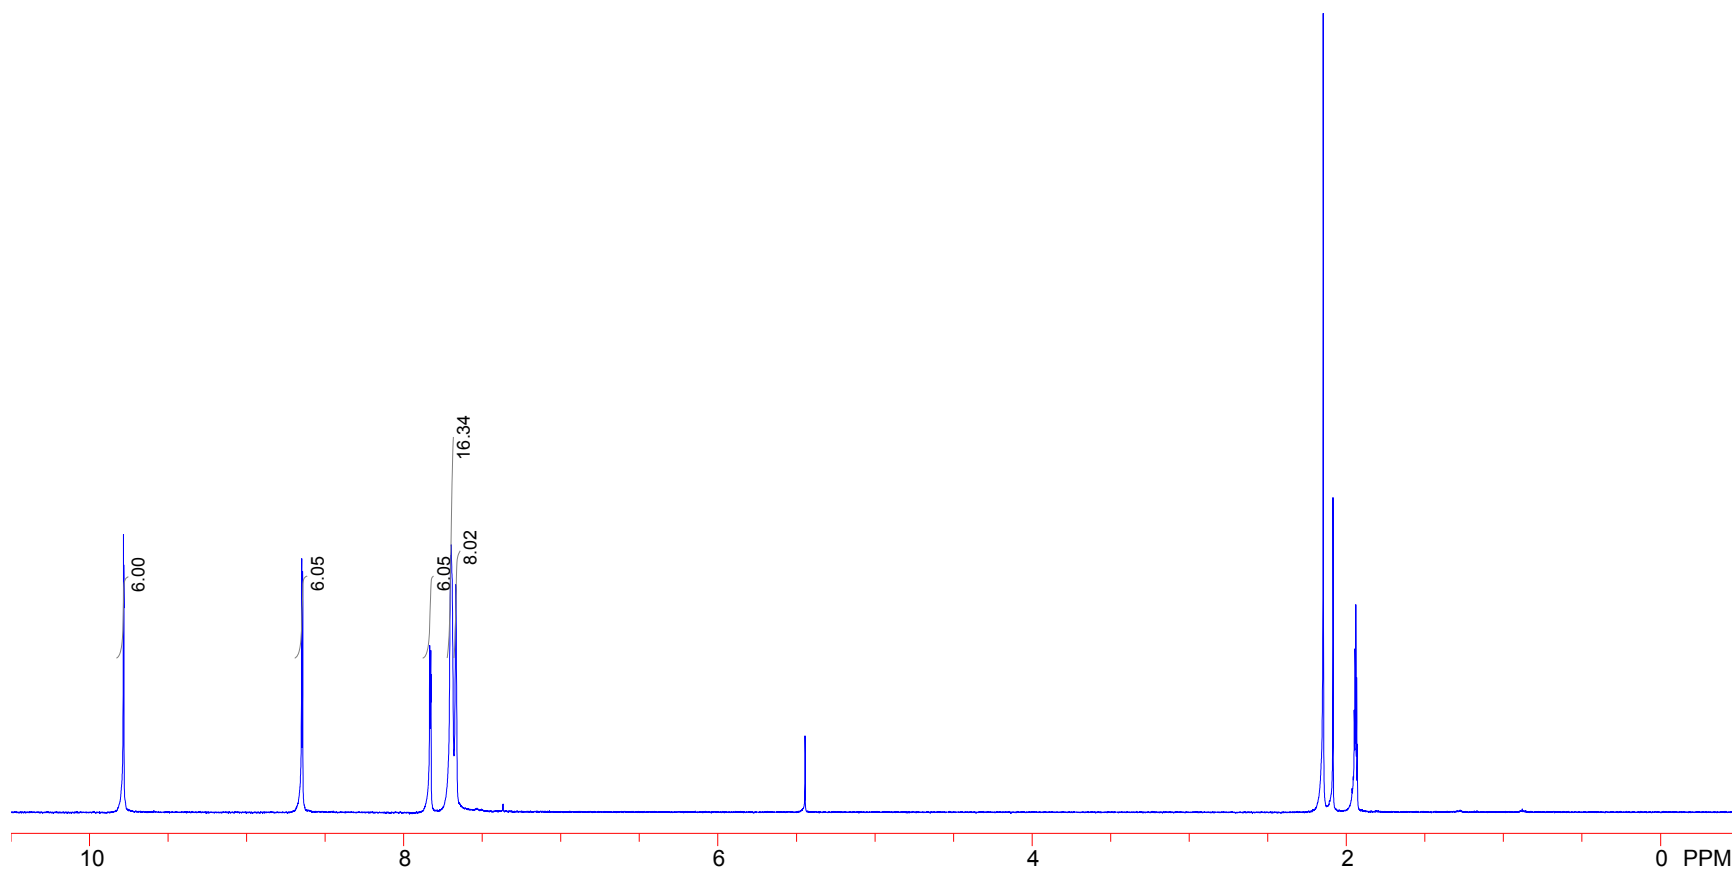

Ru(bpz)<sub>3</sub>(BARF)<sub>2</sub>  
<sup>13</sup>C NMR  
125 MHz  
CD<sub>3</sub>CN

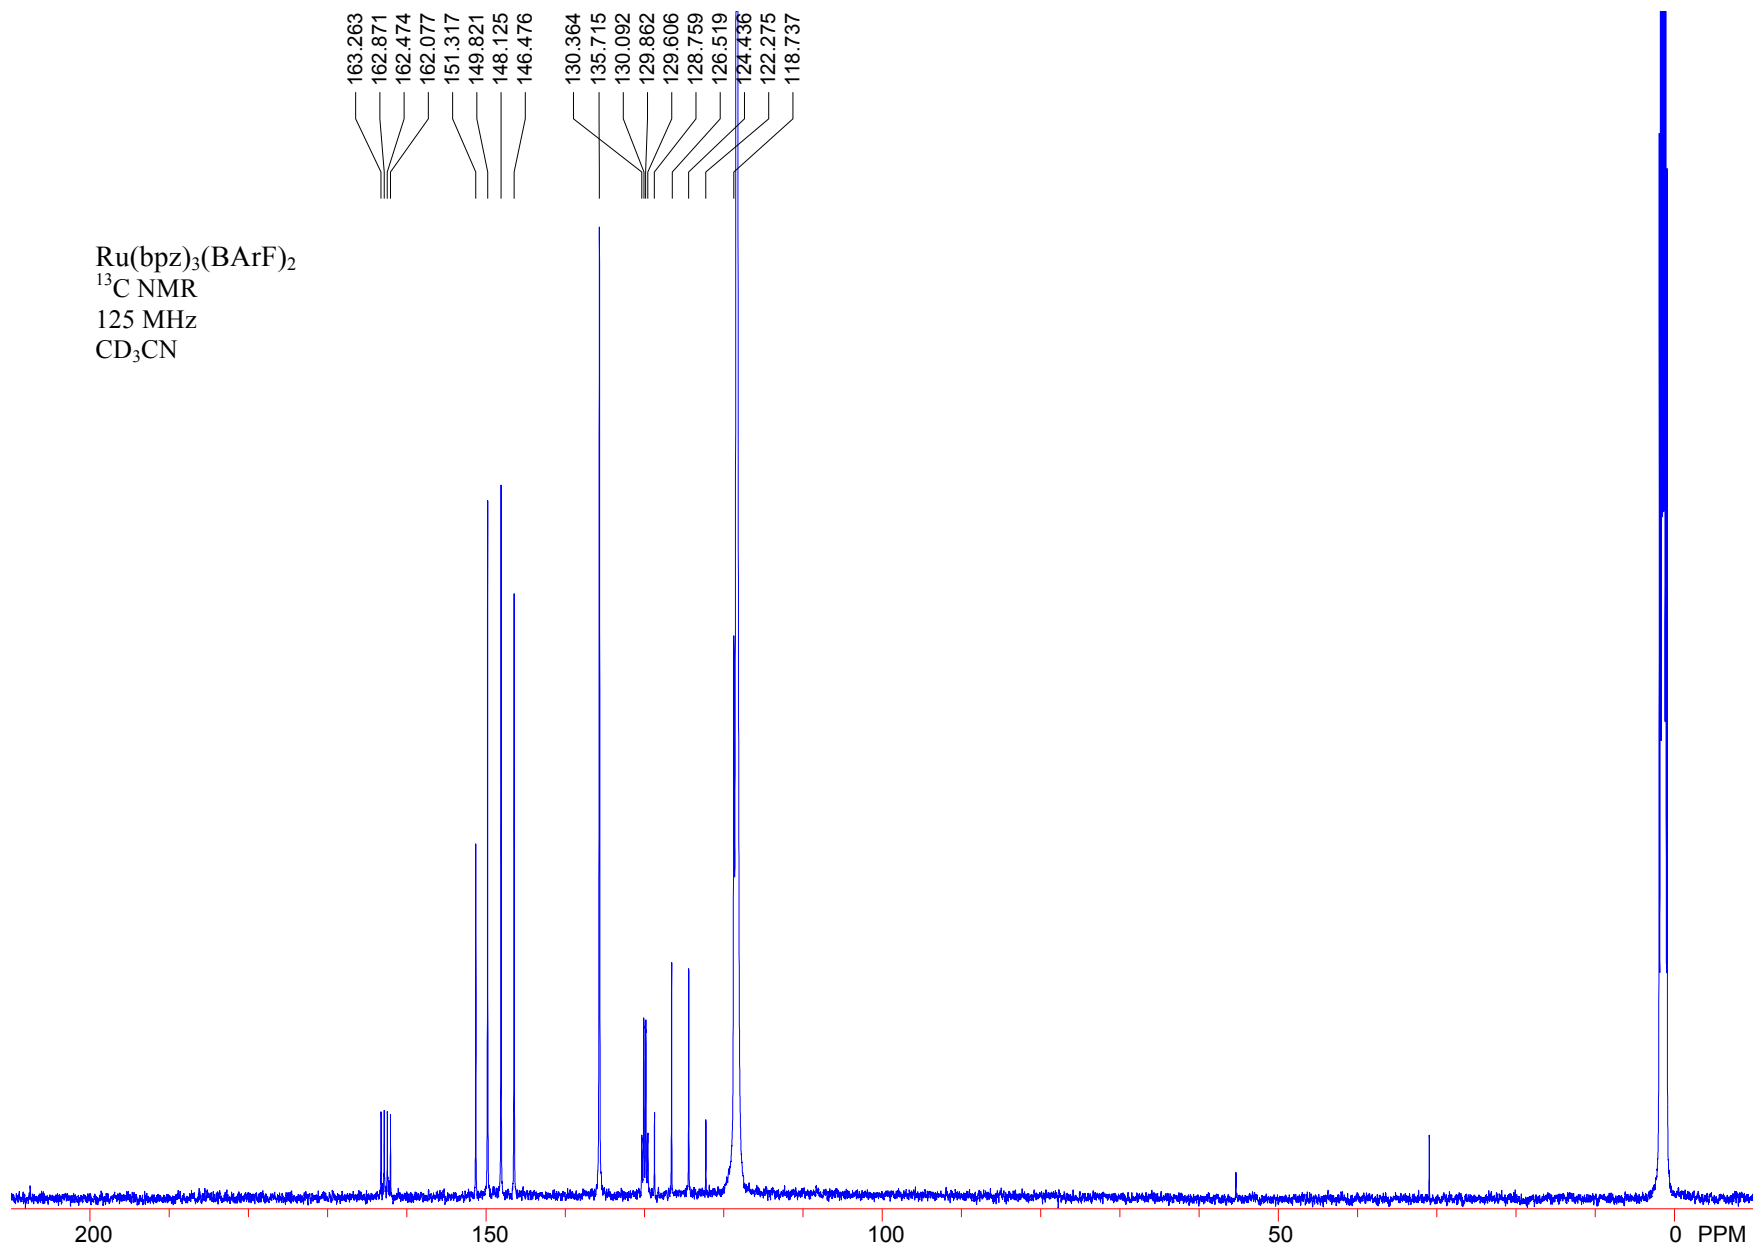

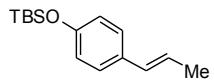

$^1\text{H}$  NMR  
500 MHz  
 $\text{CDCl}_3$

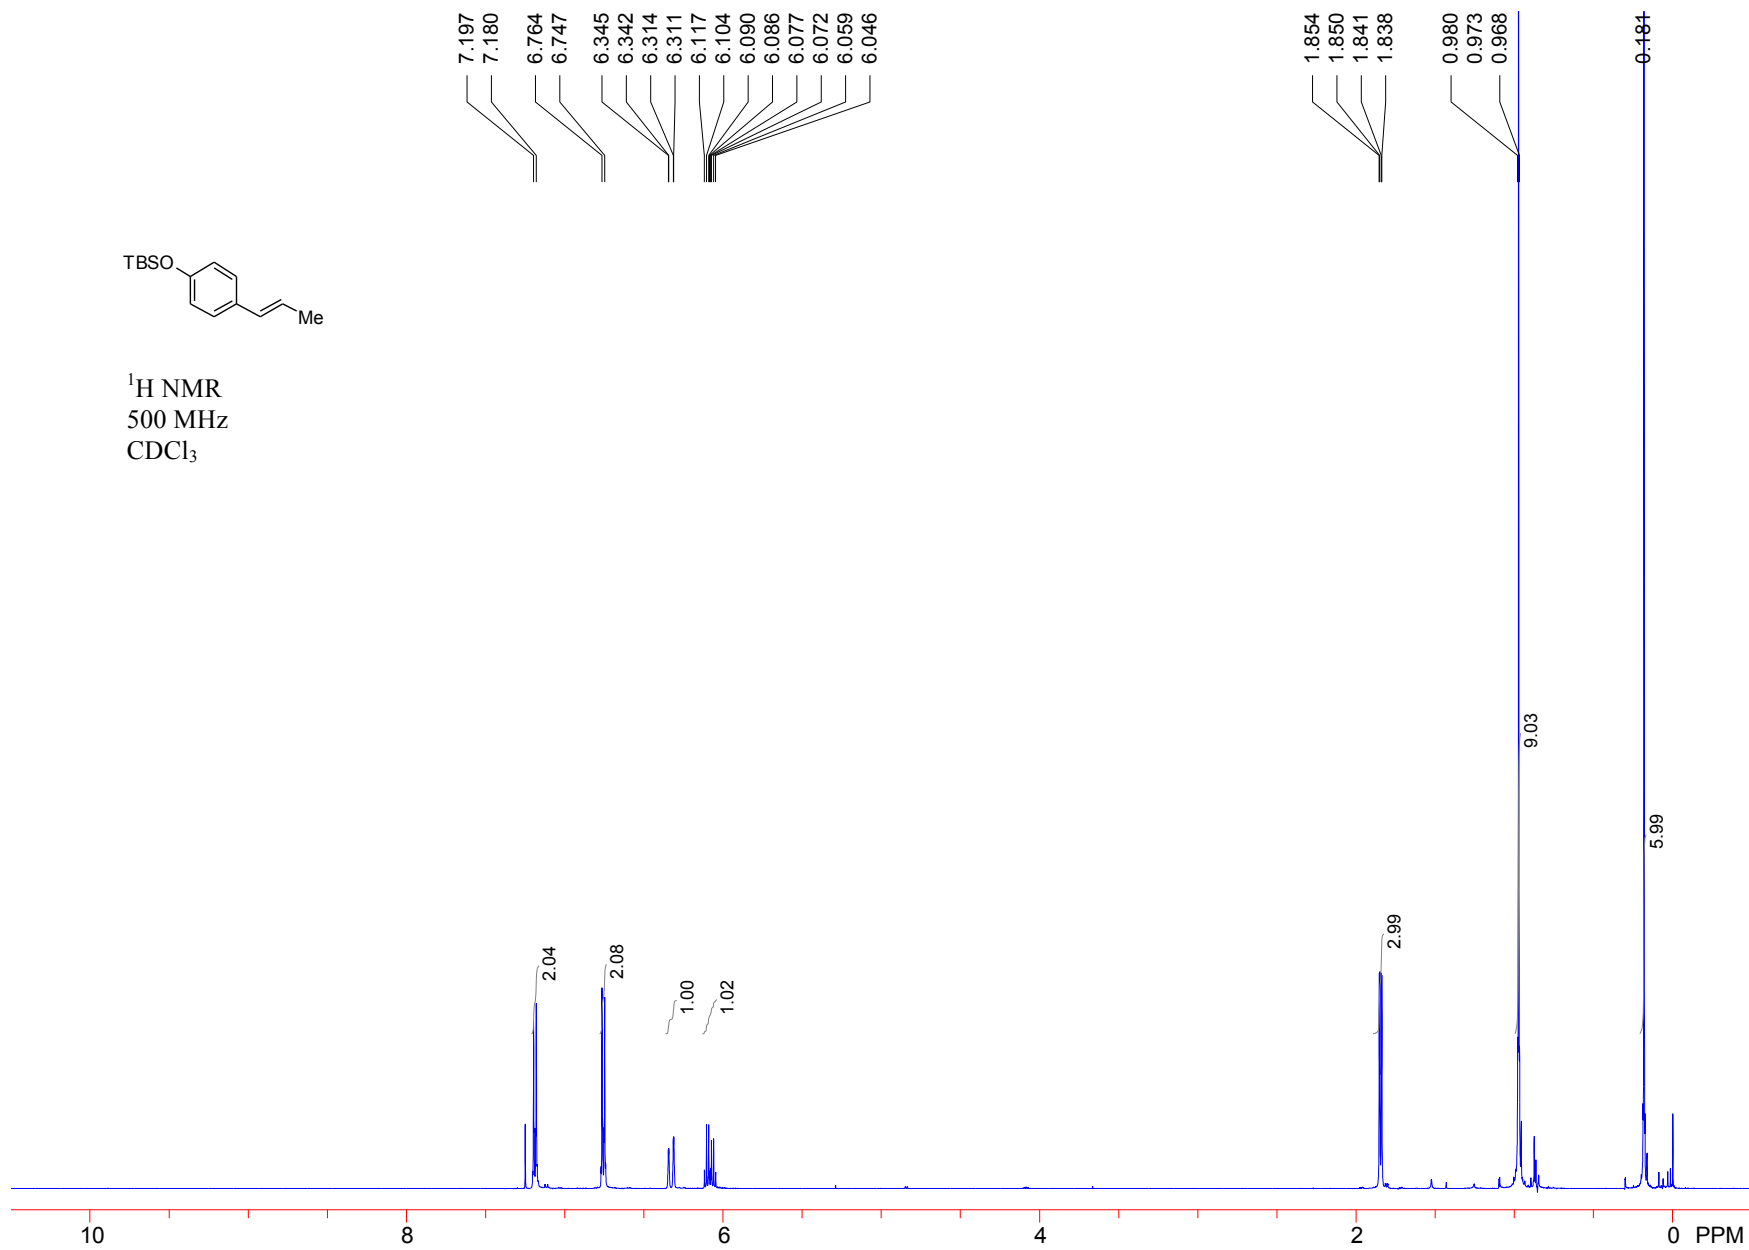

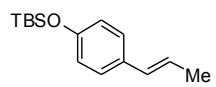

$^{13}\text{C}$  NMR  
125 MHz  
 $\text{CDCl}_3$

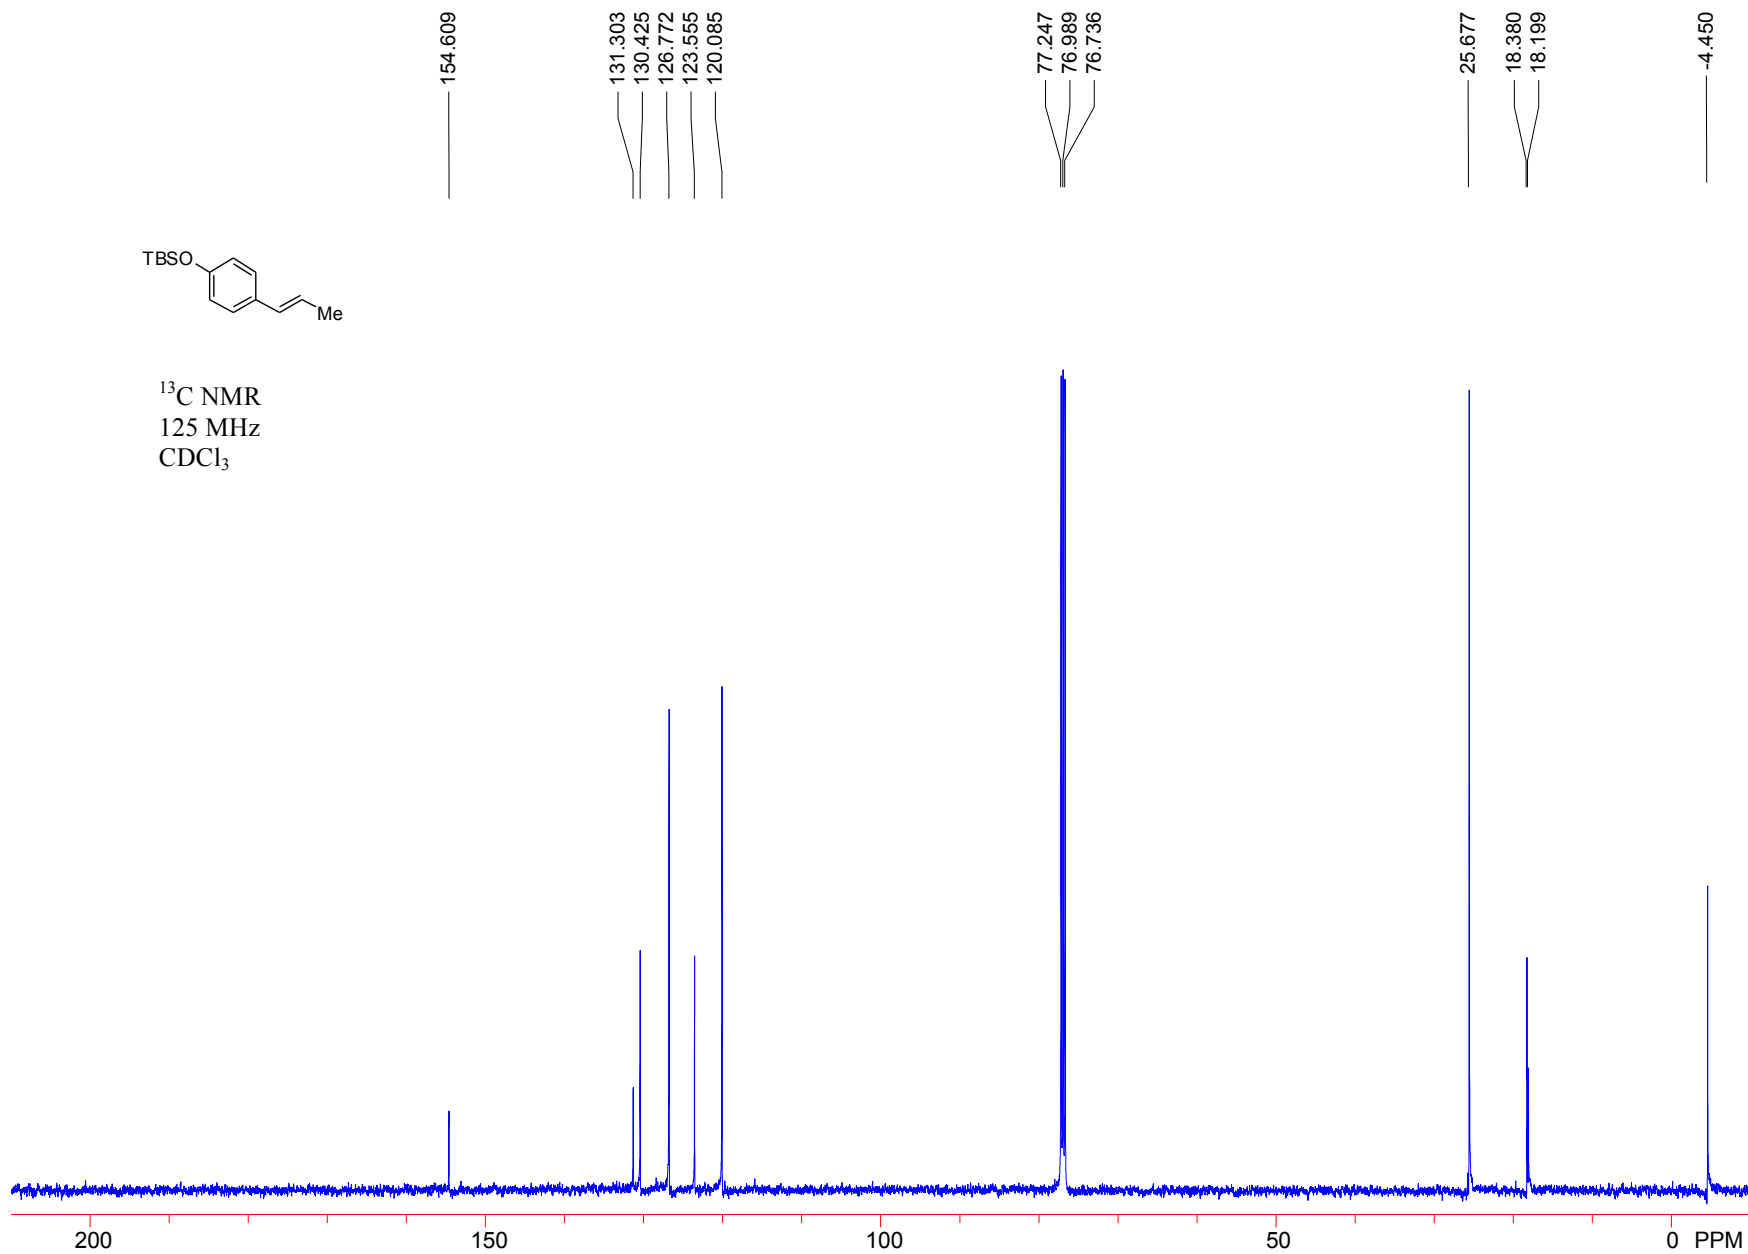

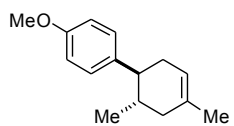

$^1\text{H}$  NMR  
500 MHz  
 $\text{CDCl}_3$

7.269  
7.122  
7.105  
6.879  
6.876  
6.866  
6.862

5.479

3.817  
2.359  
2.347  
2.337  
2.327  
2.316  
2.305  
2.228  
2.211  
2.181  
2.138  
2.131  
2.104  
2.096  
1.941  
1.933  
1.924  
1.912  
1.903  
1.891  
1.862  
1.834  
1.828  
1.808  
1.725  
0.750  
0.737

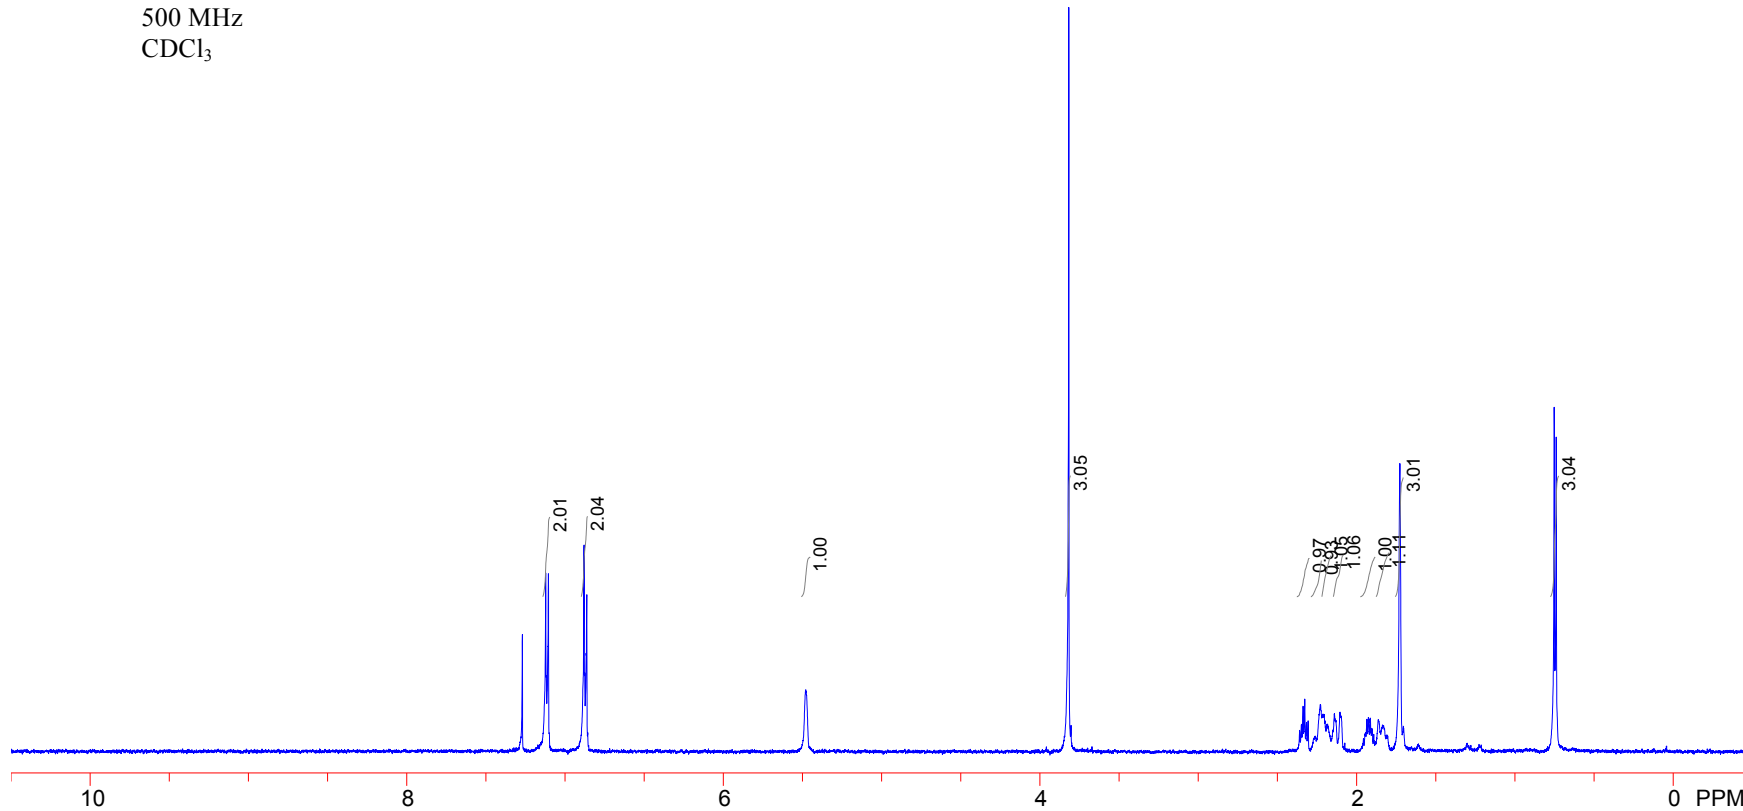

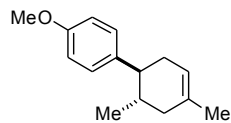

$^{13}\text{C}$  NMR  
125 MHz  
 $\text{CDCl}_3$

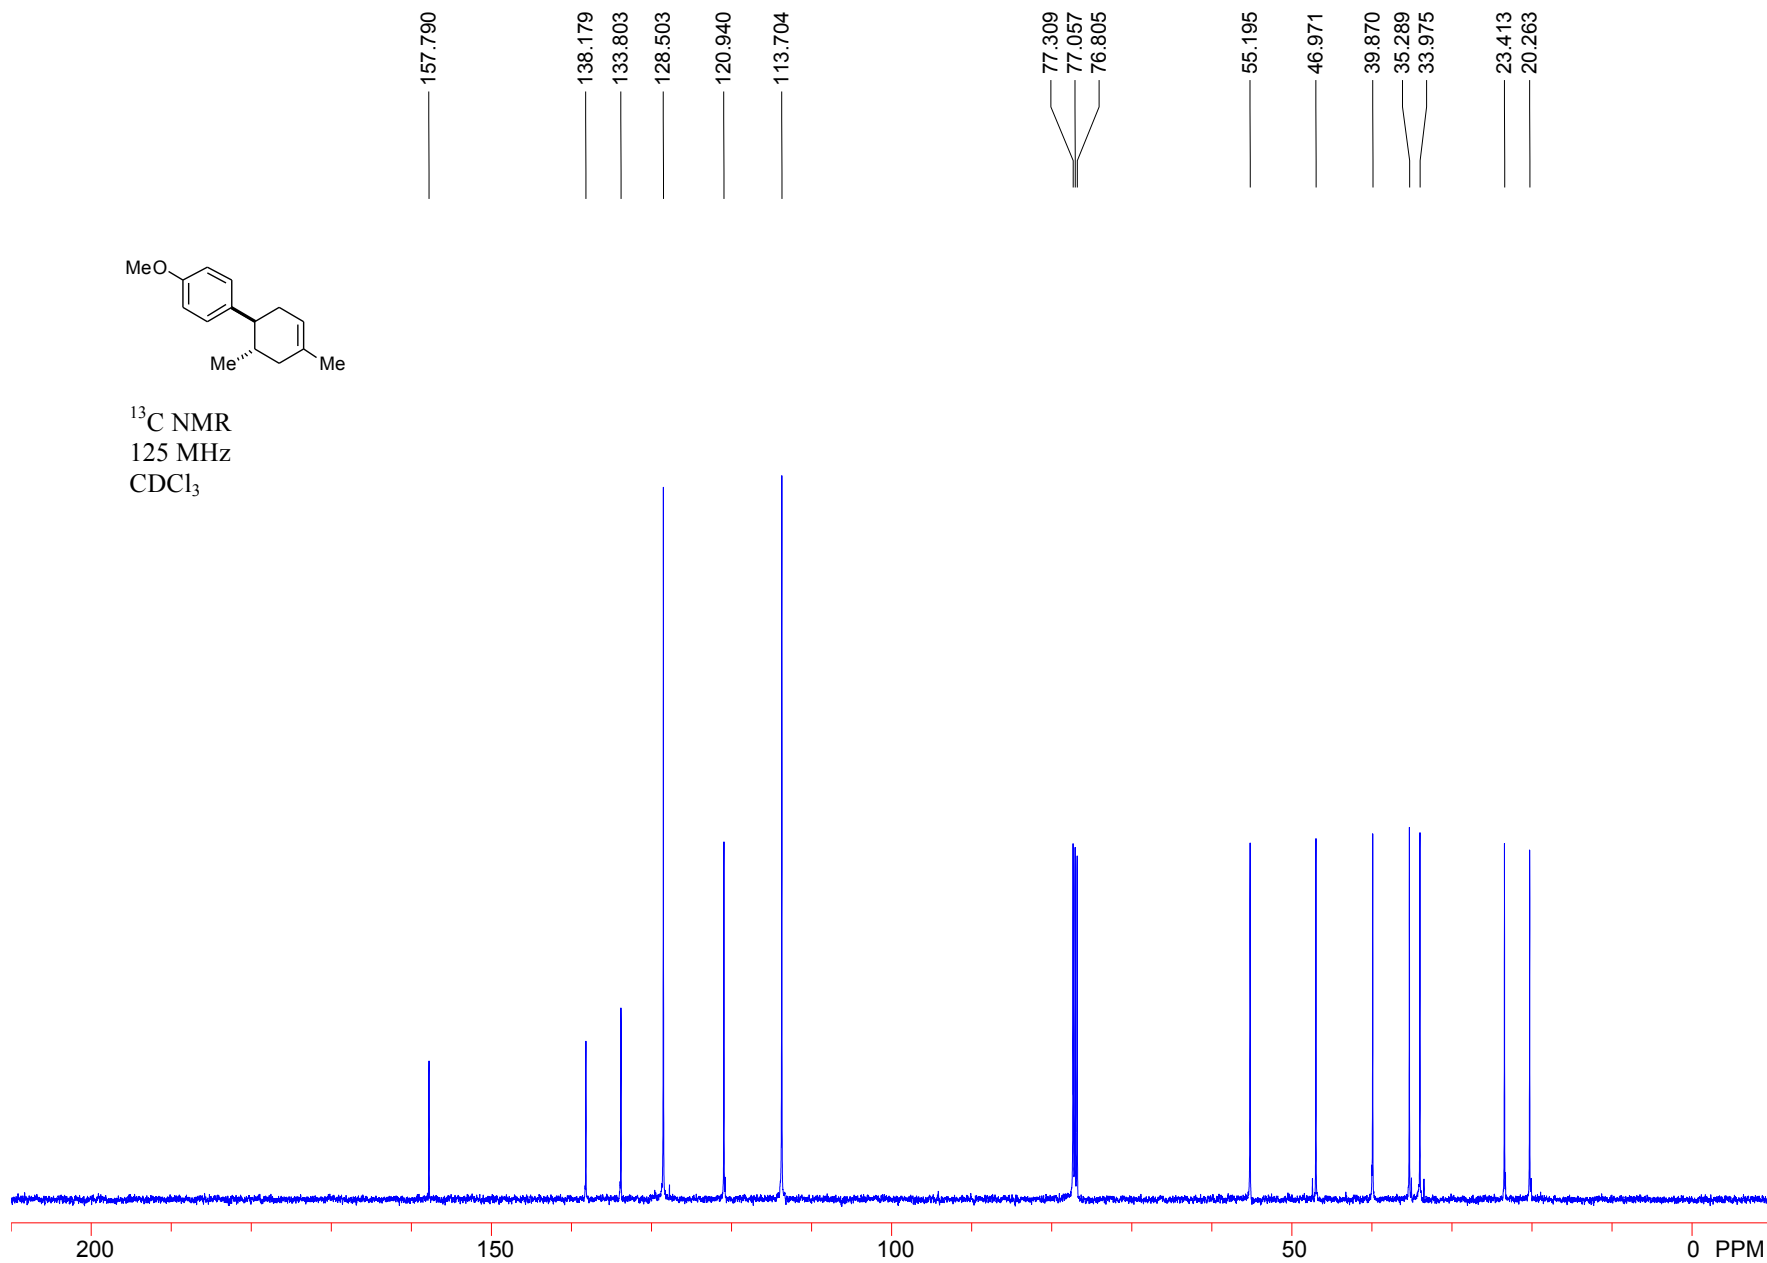



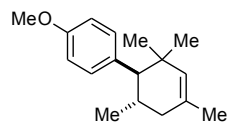

<sup>1</sup>H NMR  
500 MHz  
C<sub>6</sub>D<sub>6</sub>

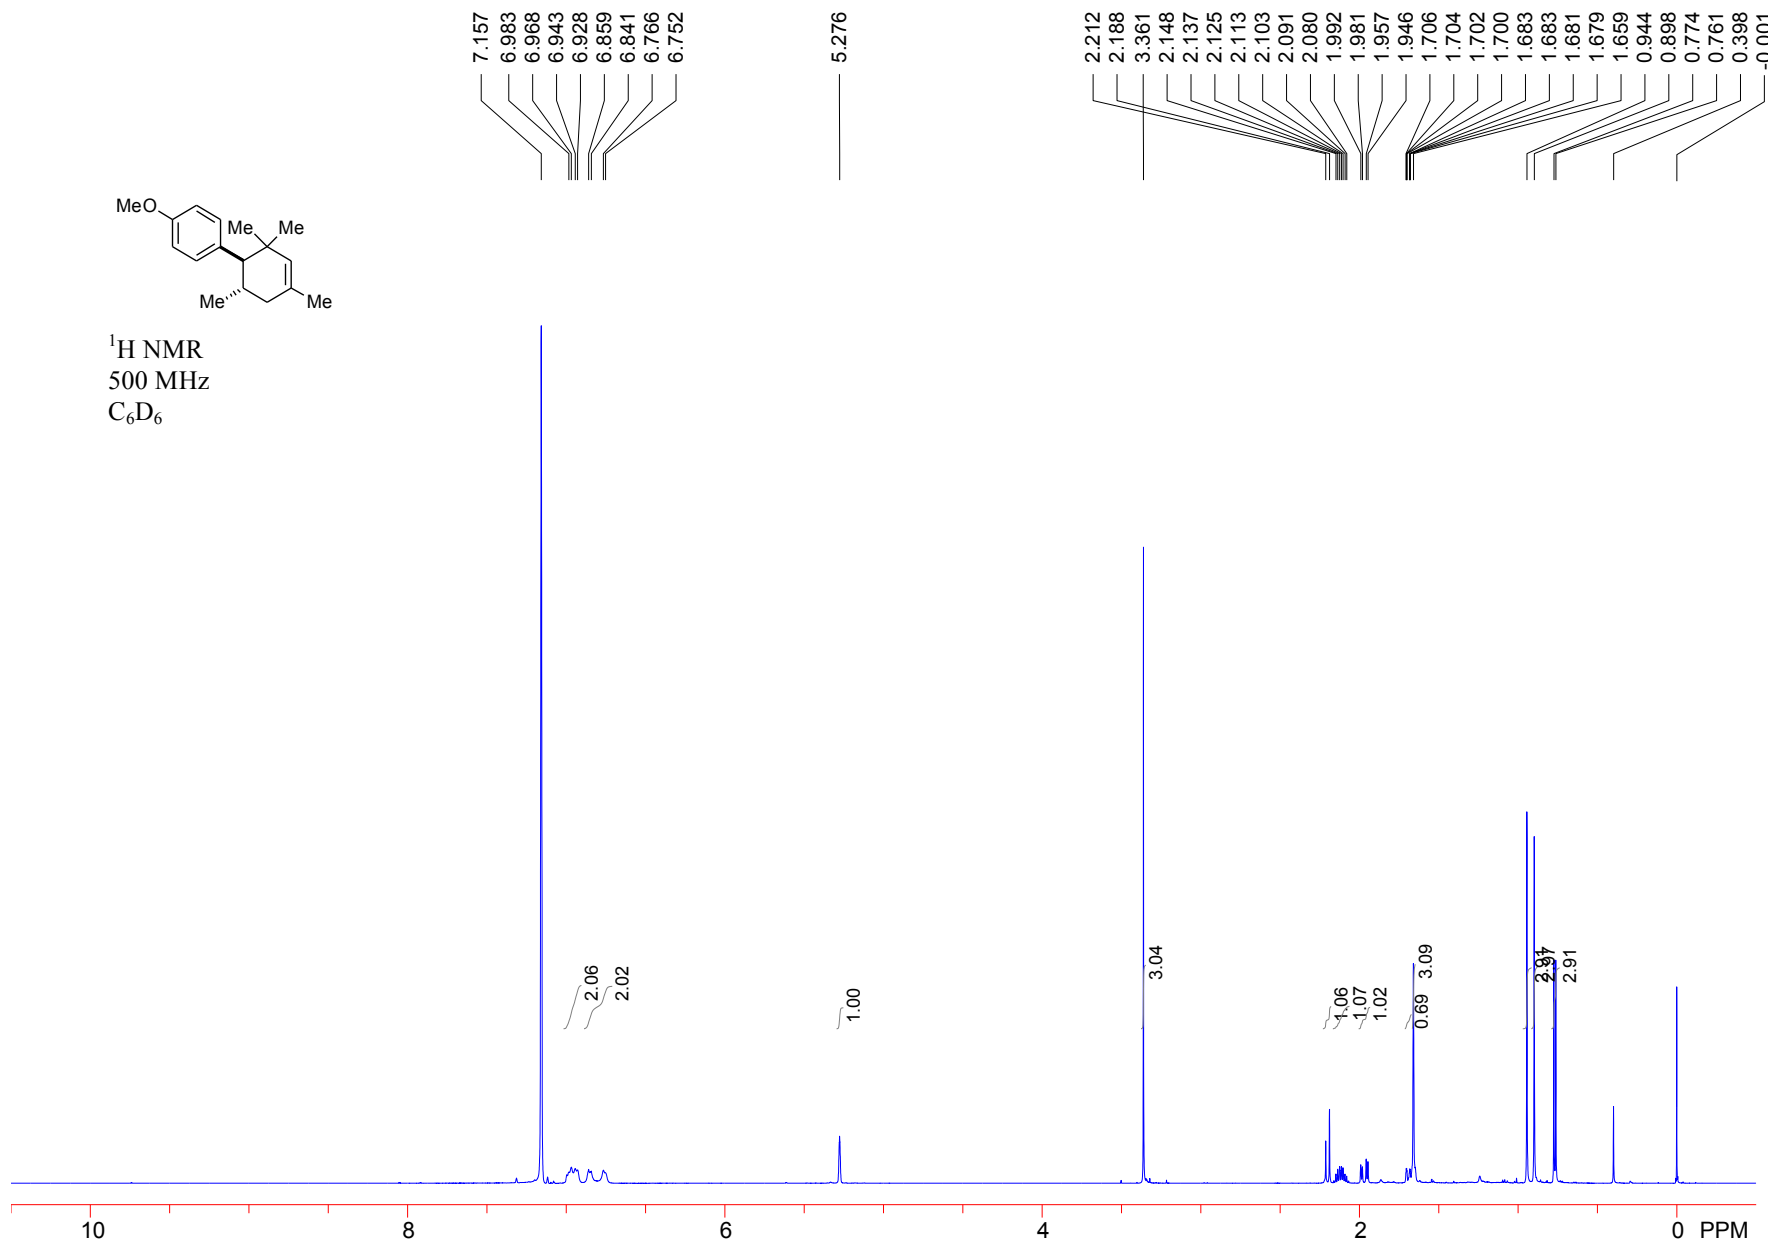

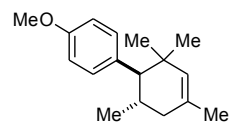

$^{13}\text{C}$  NMR  
125 MHz  
 $\text{CDCl}_3$

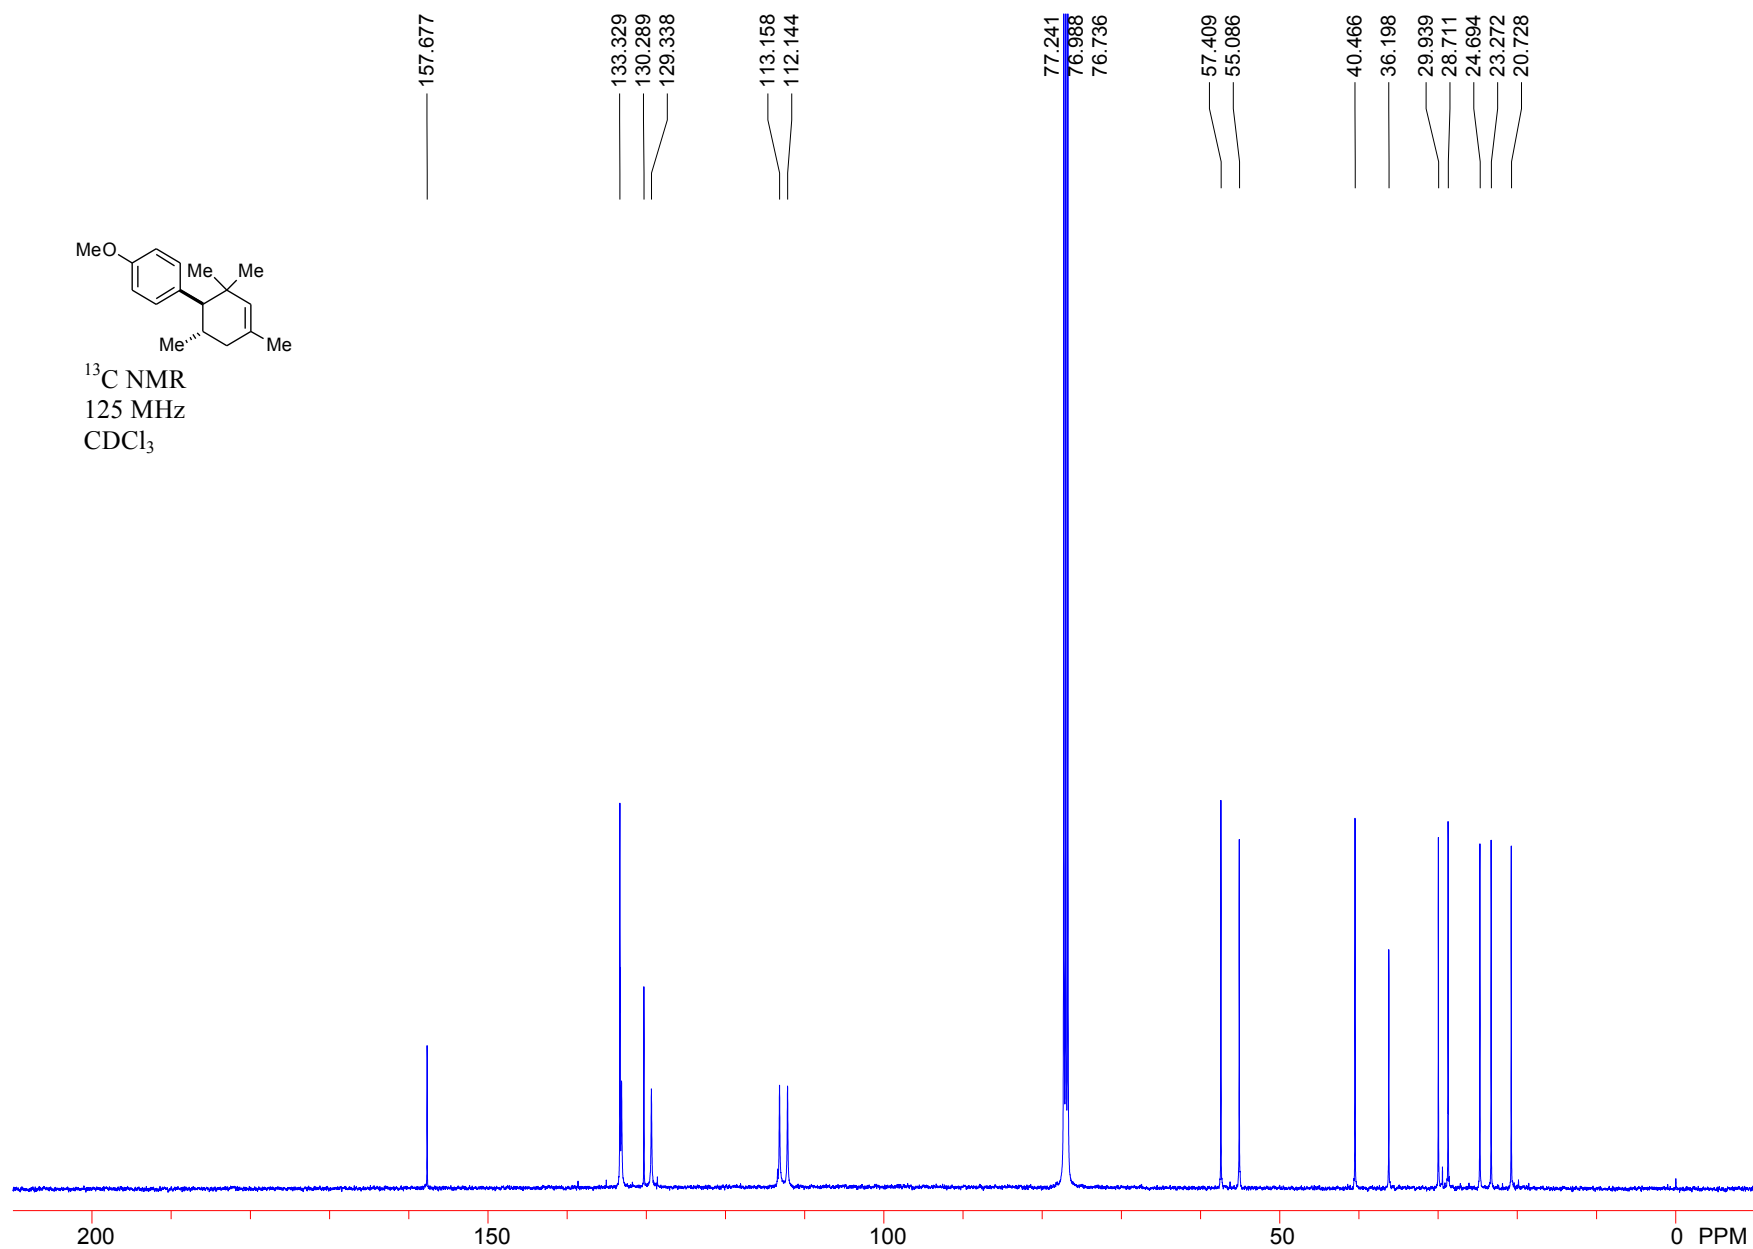

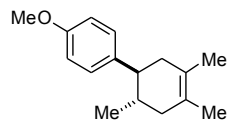

<sup>1</sup>H NMR  
500 MHz  
CDCl<sub>3</sub>

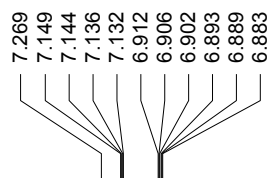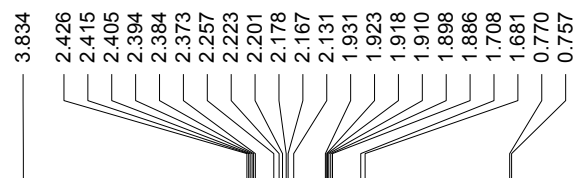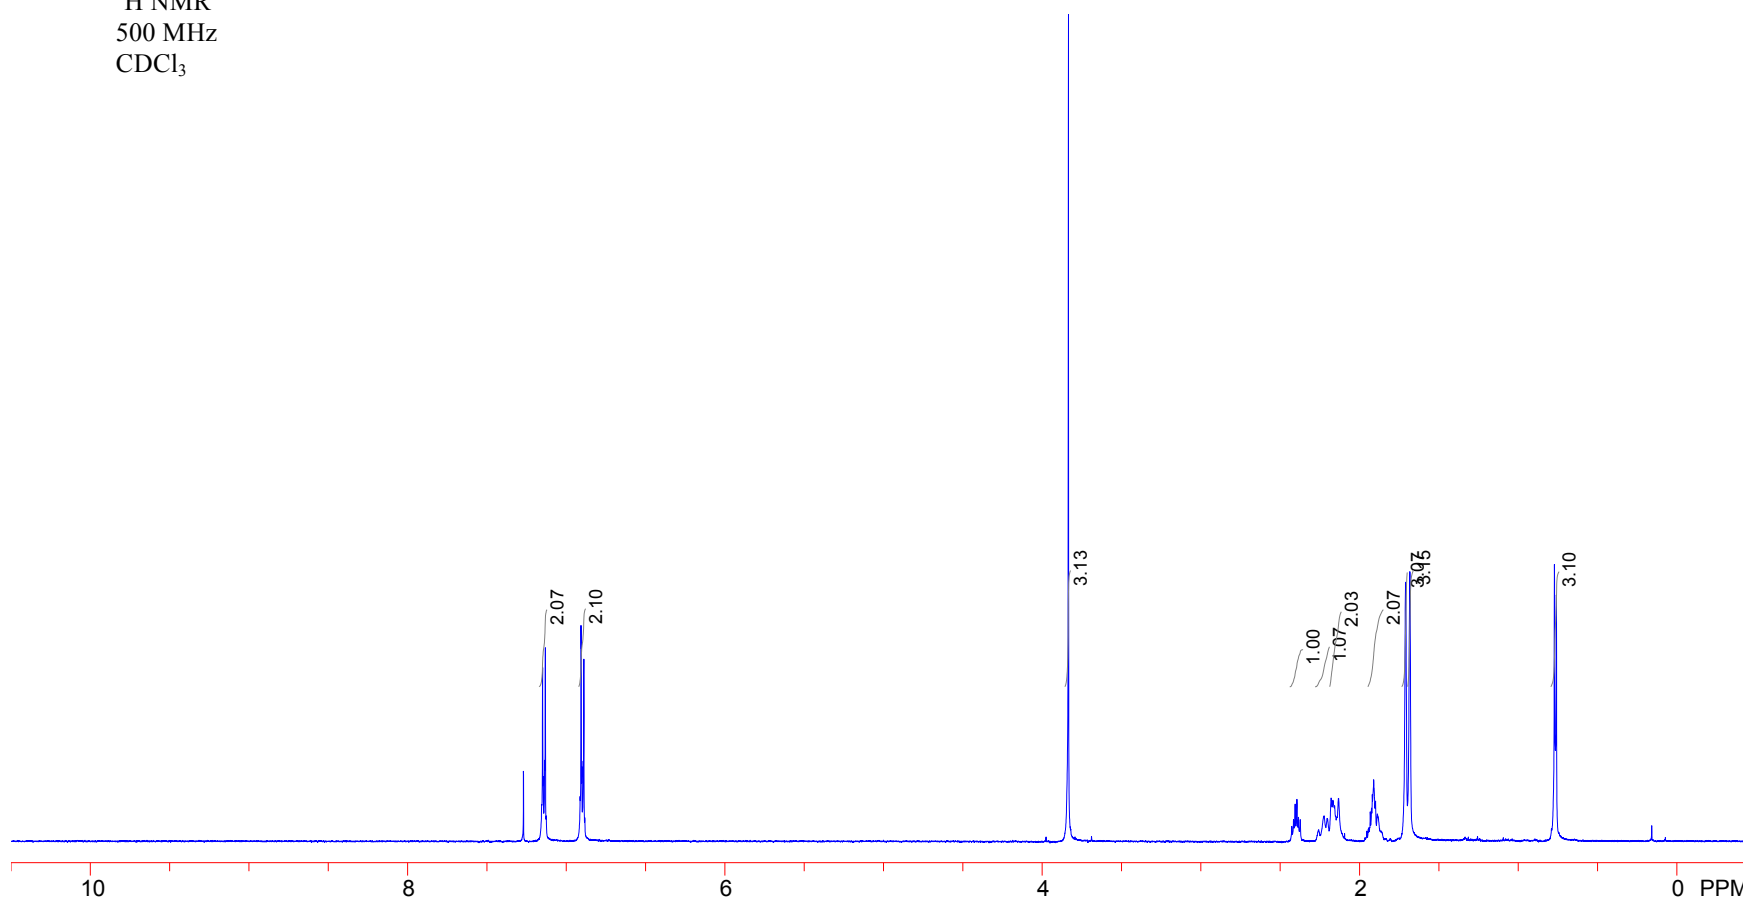

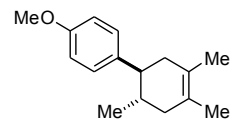

$^{13}\text{C}$  NMR  
125 MHz  
 $\text{CDCl}_3$

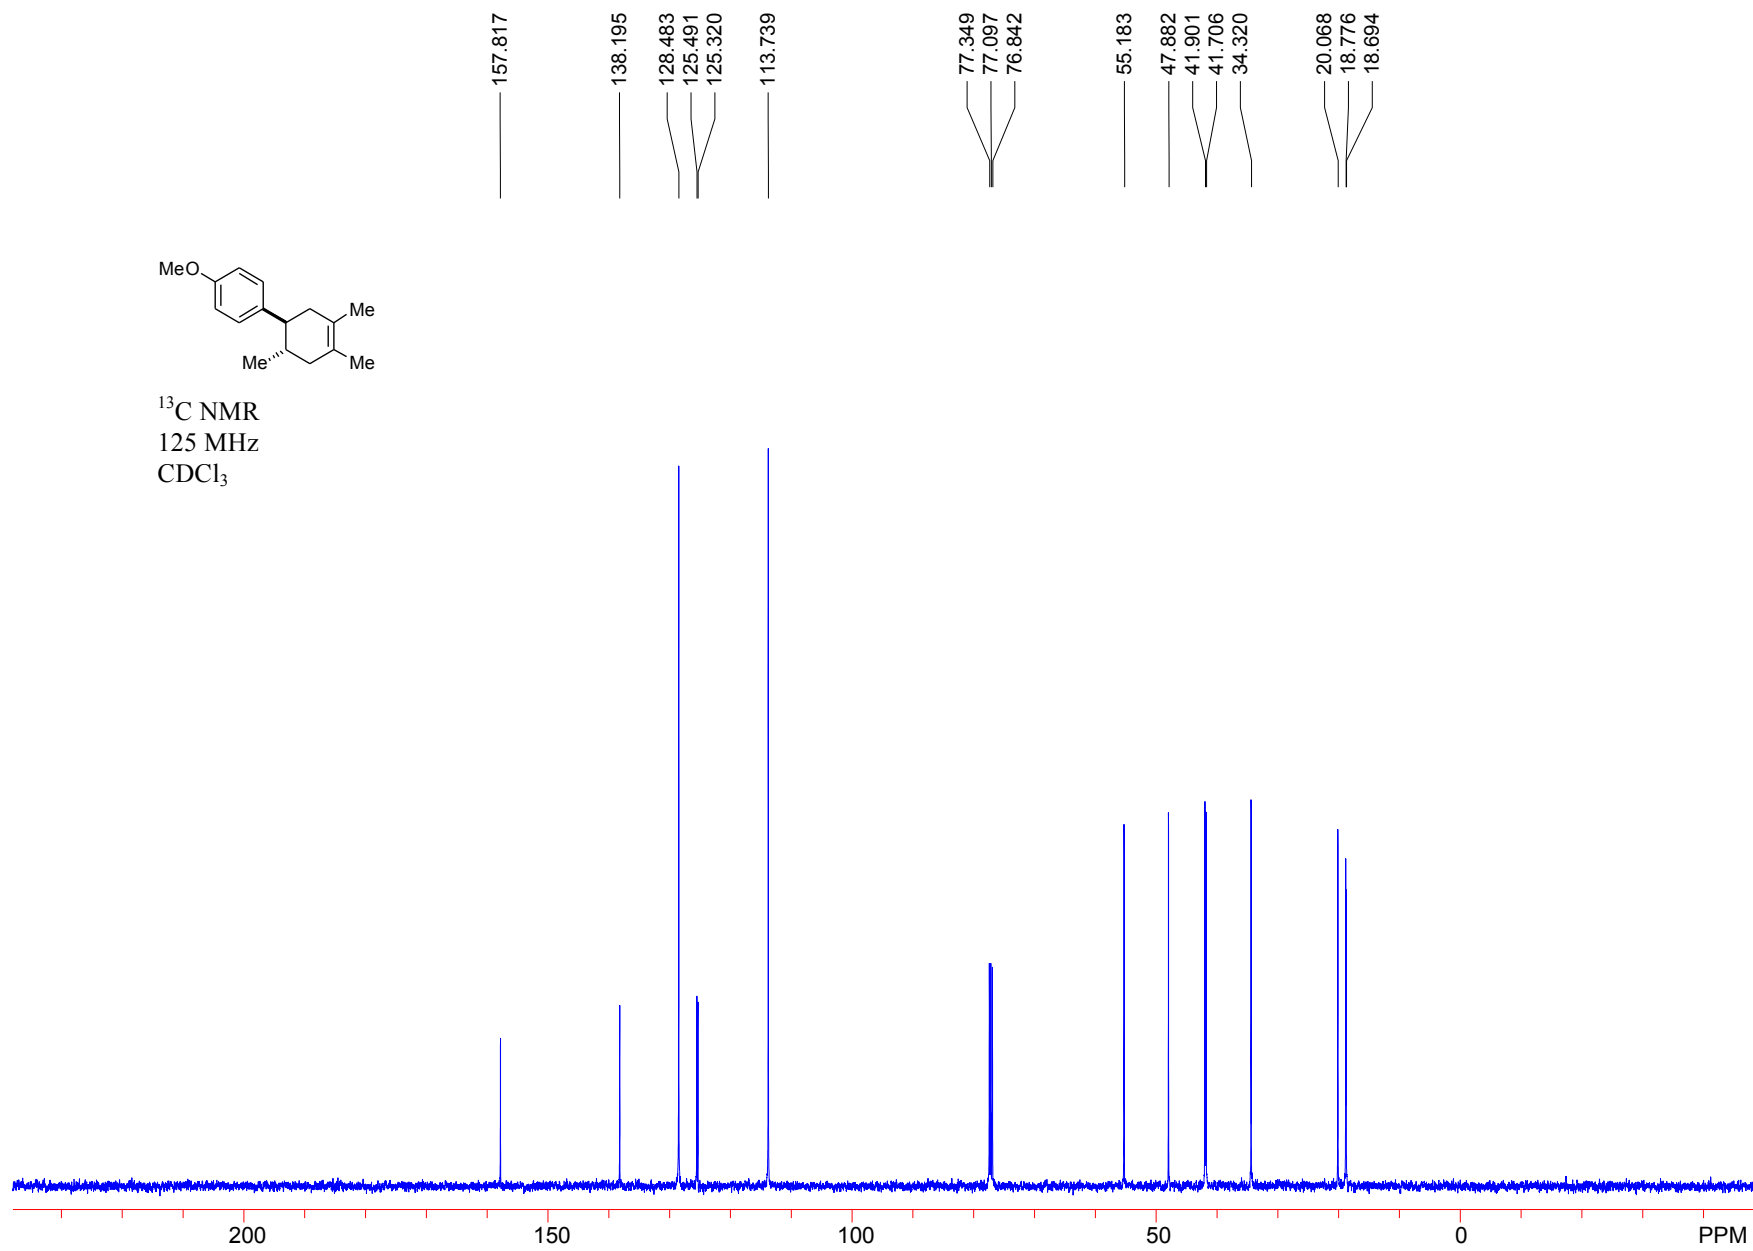

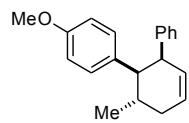

<sup>1</sup>H NMR  
500 MHz  
CDCl<sub>3</sub>

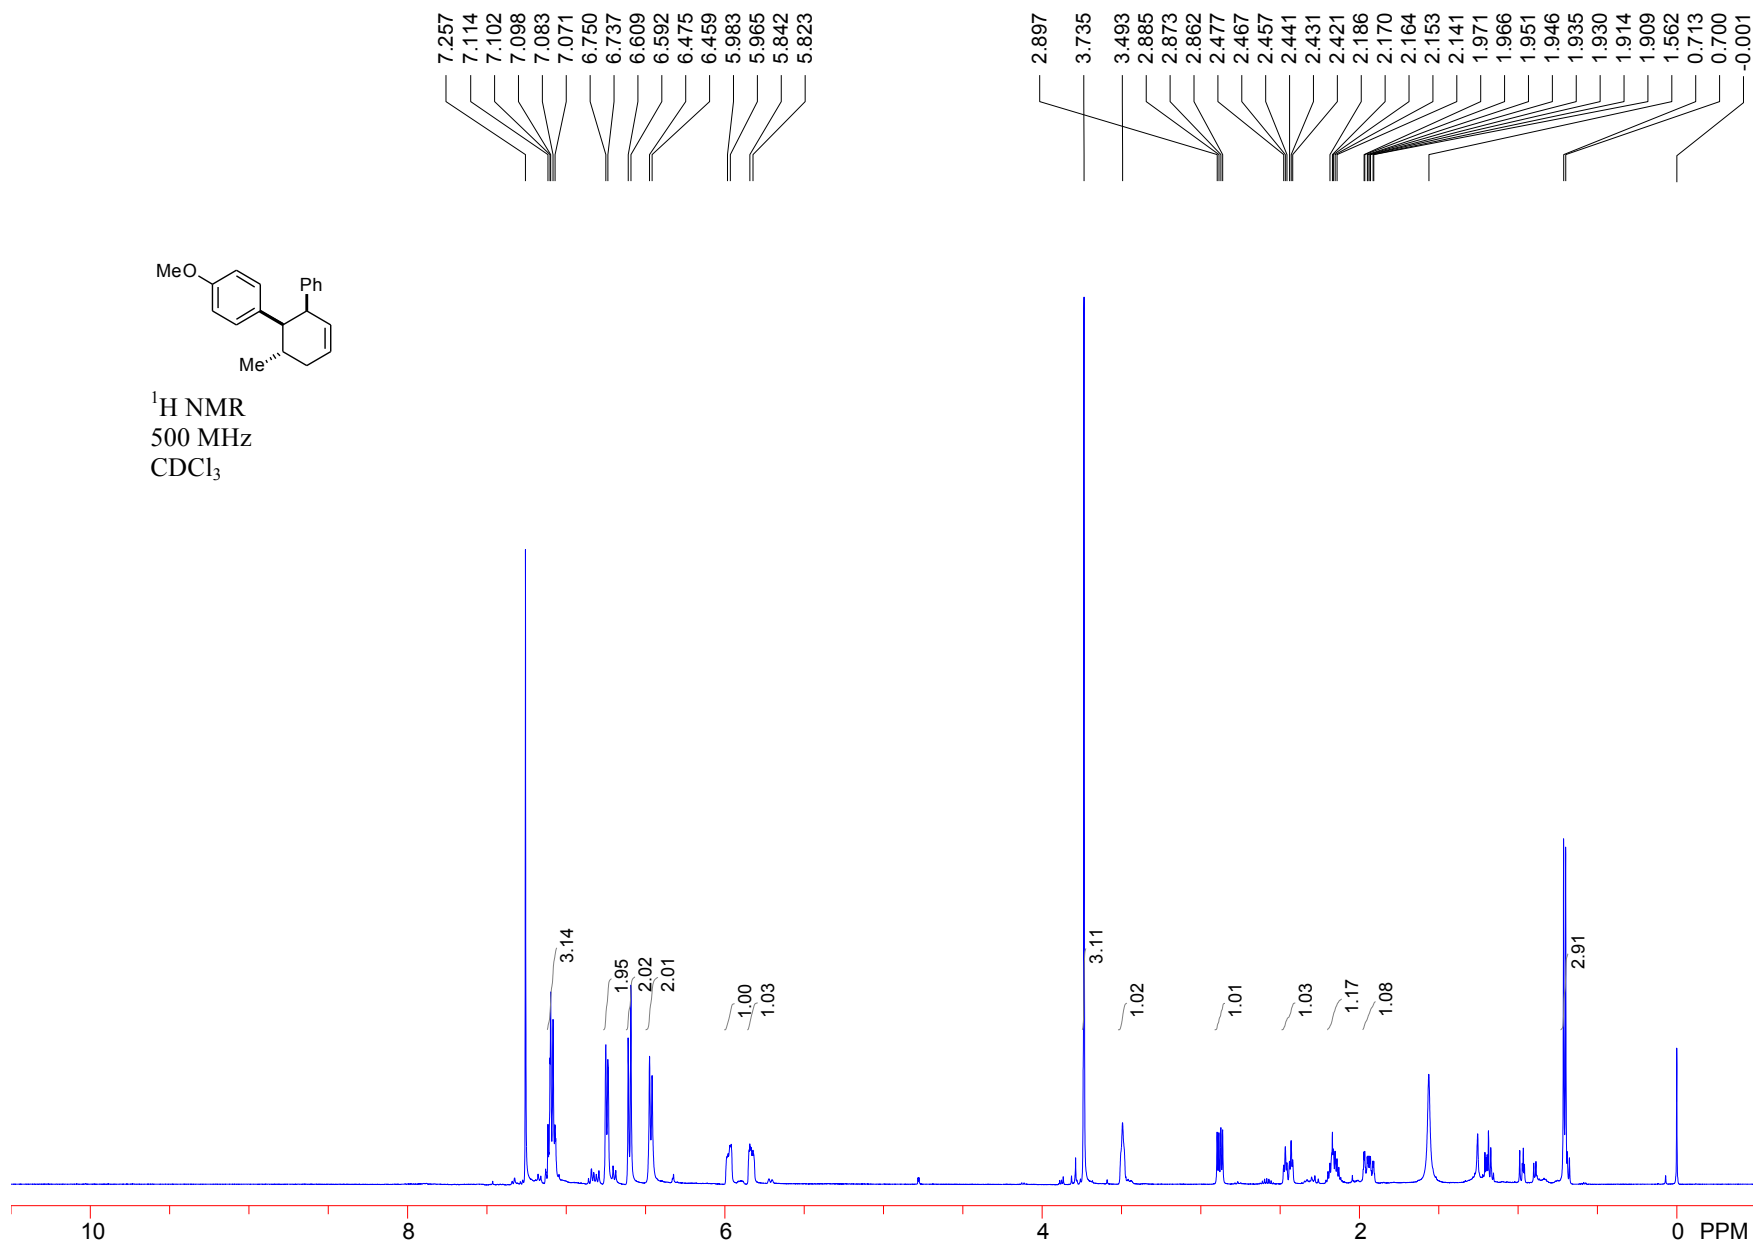

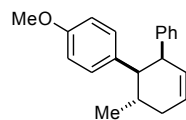

$^{13}\text{C}$  NMR  
125 MHz  
 $\text{CDCl}_3$

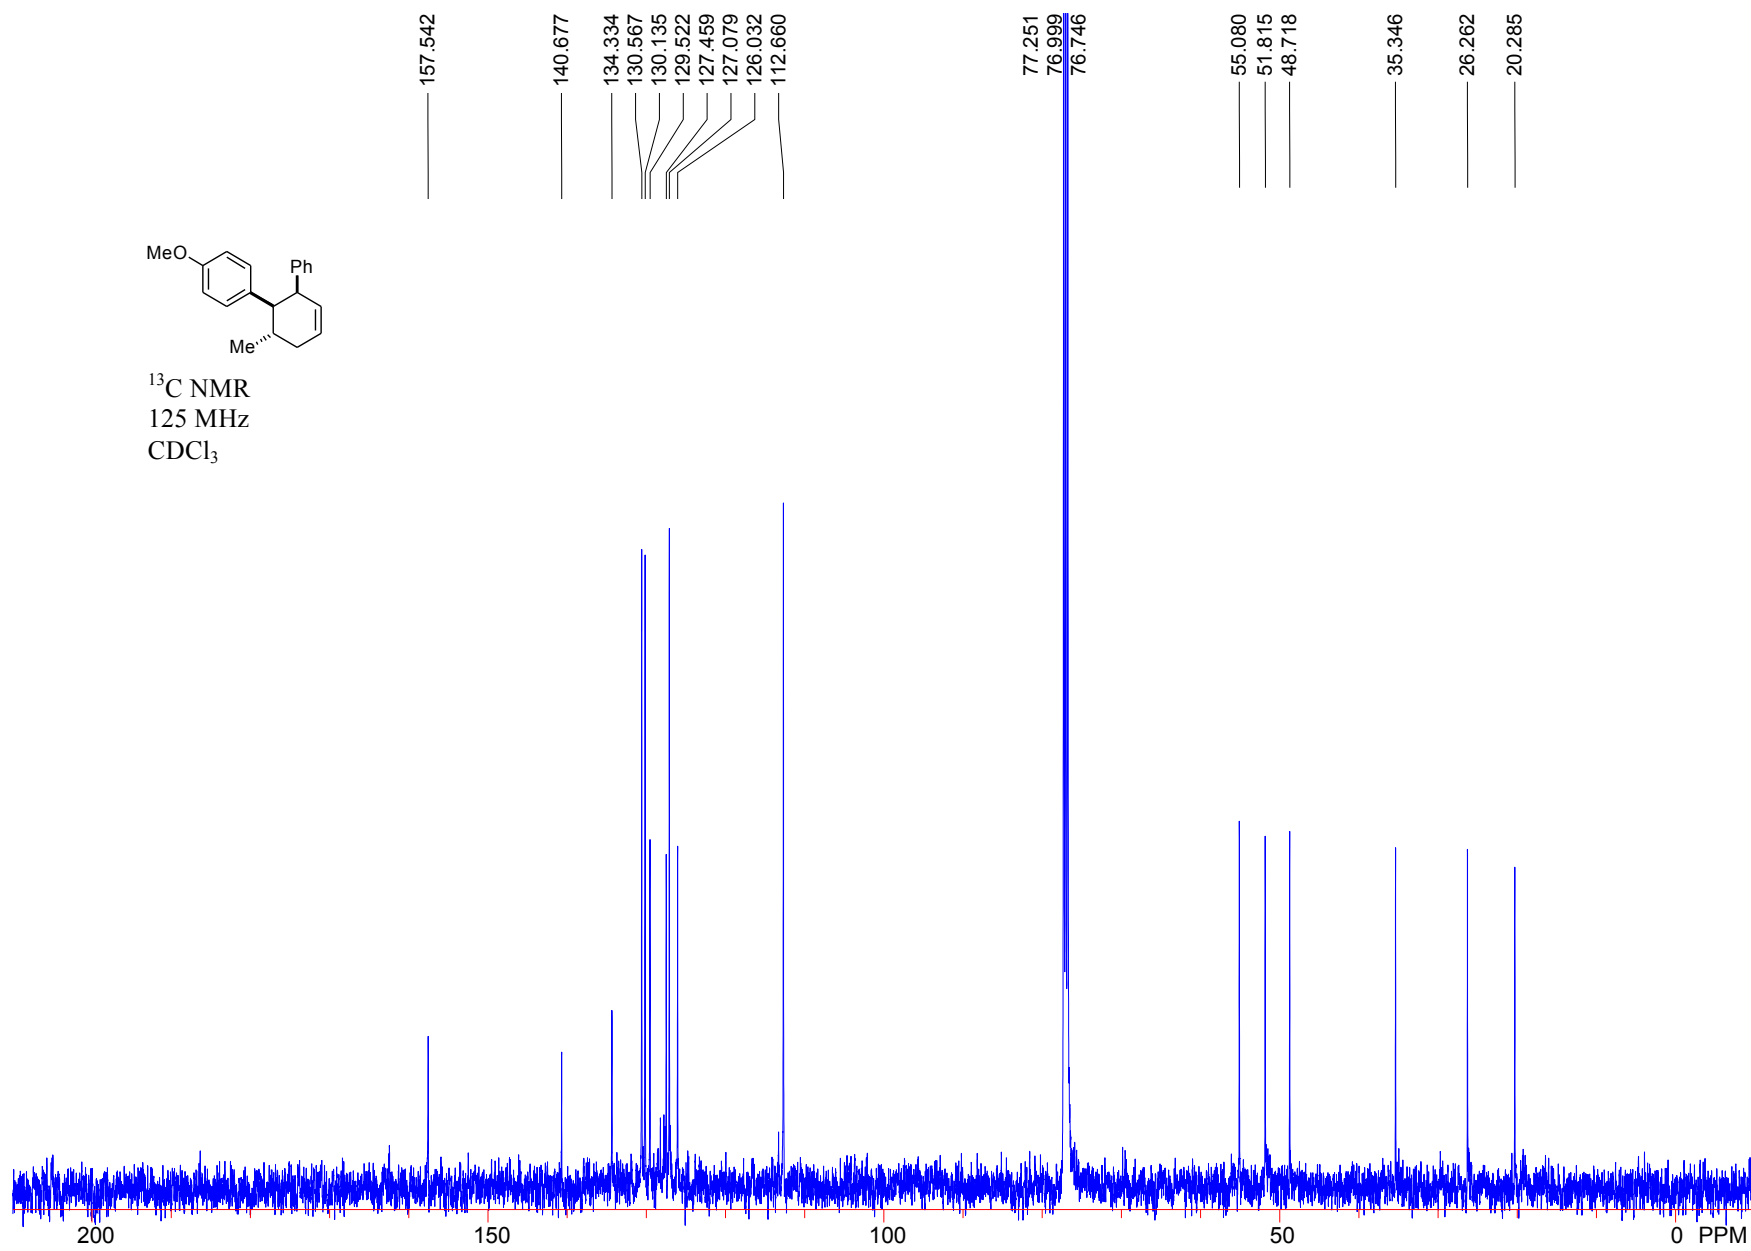

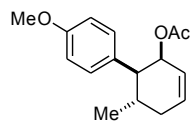

<sup>1</sup>H NMR  
500 MHz  
C<sub>6</sub>D<sub>6</sub>

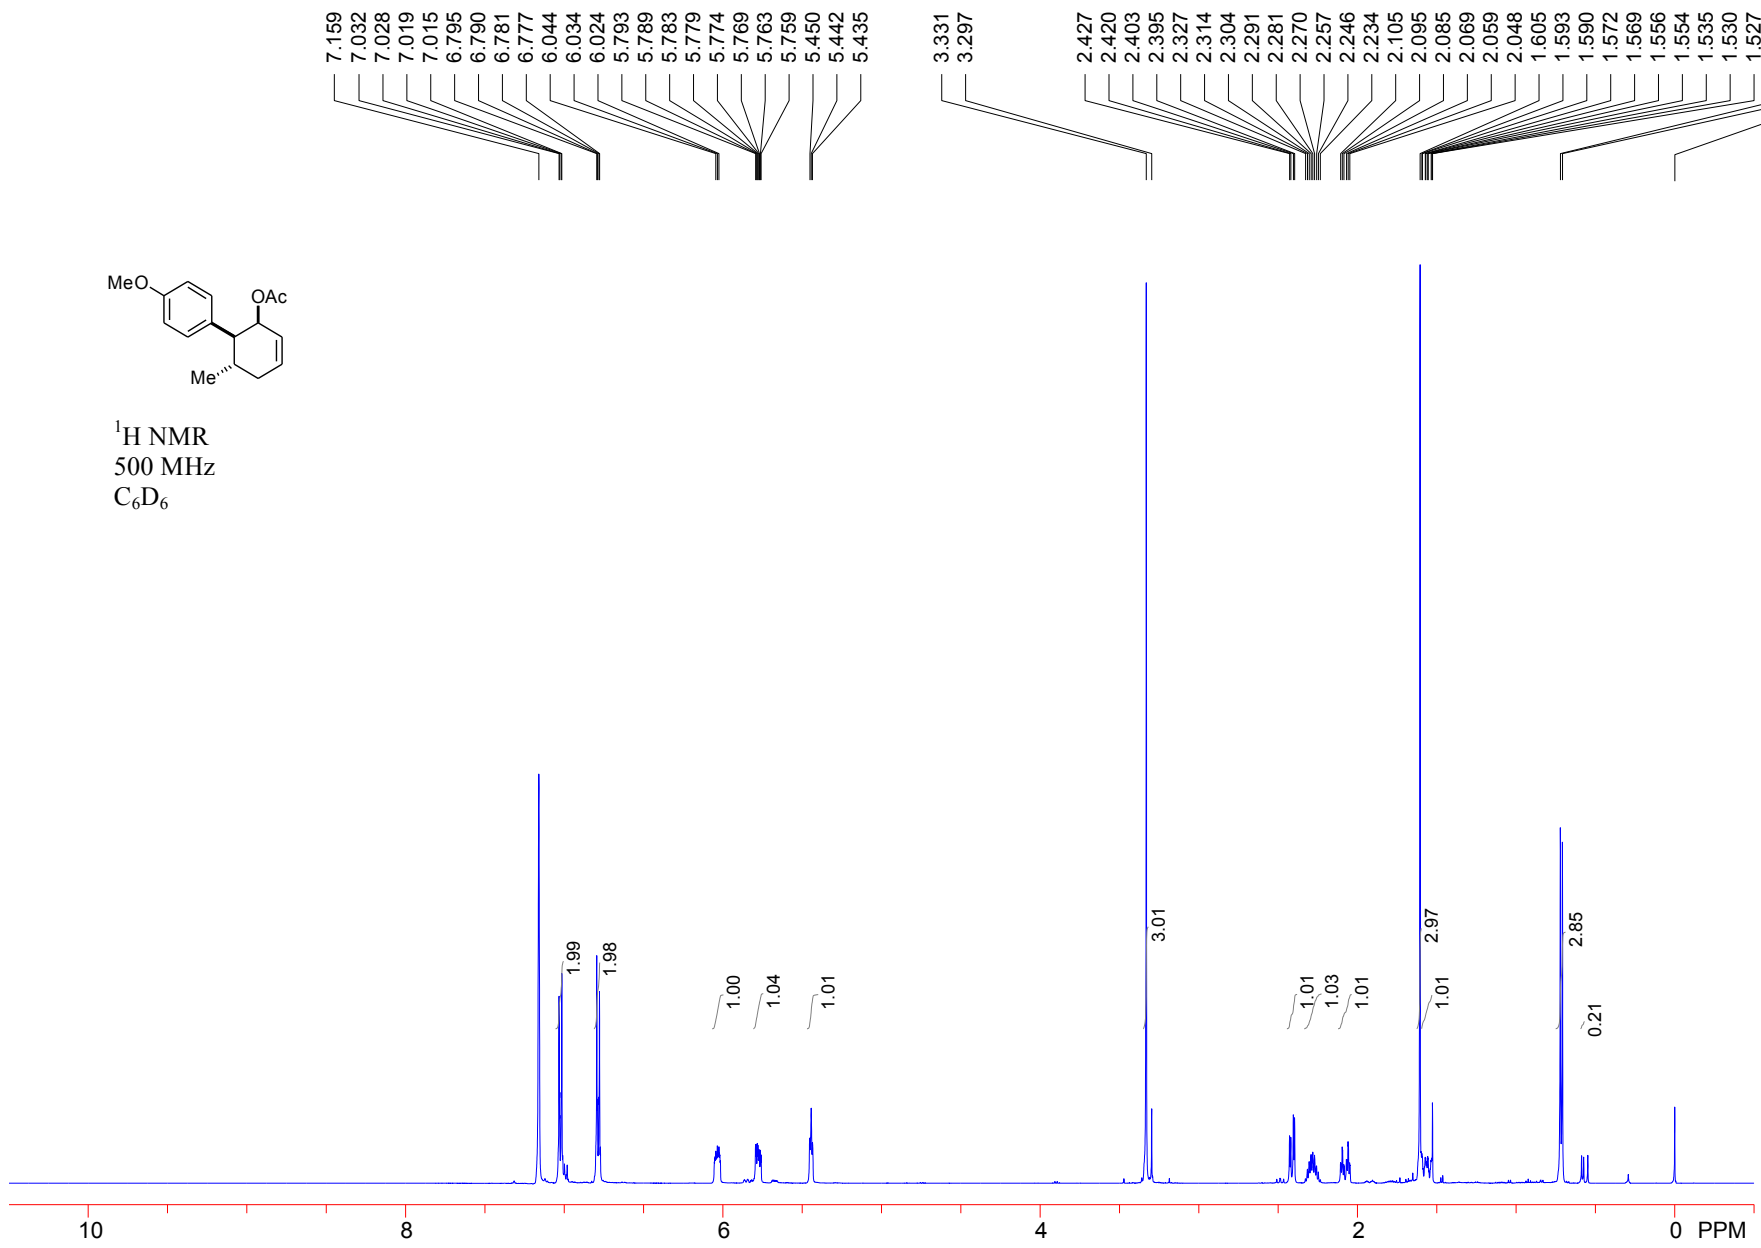

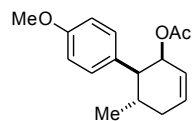

$^{13}\text{C}$  NMR  
125 MHz  
 $\text{CDCl}_3$

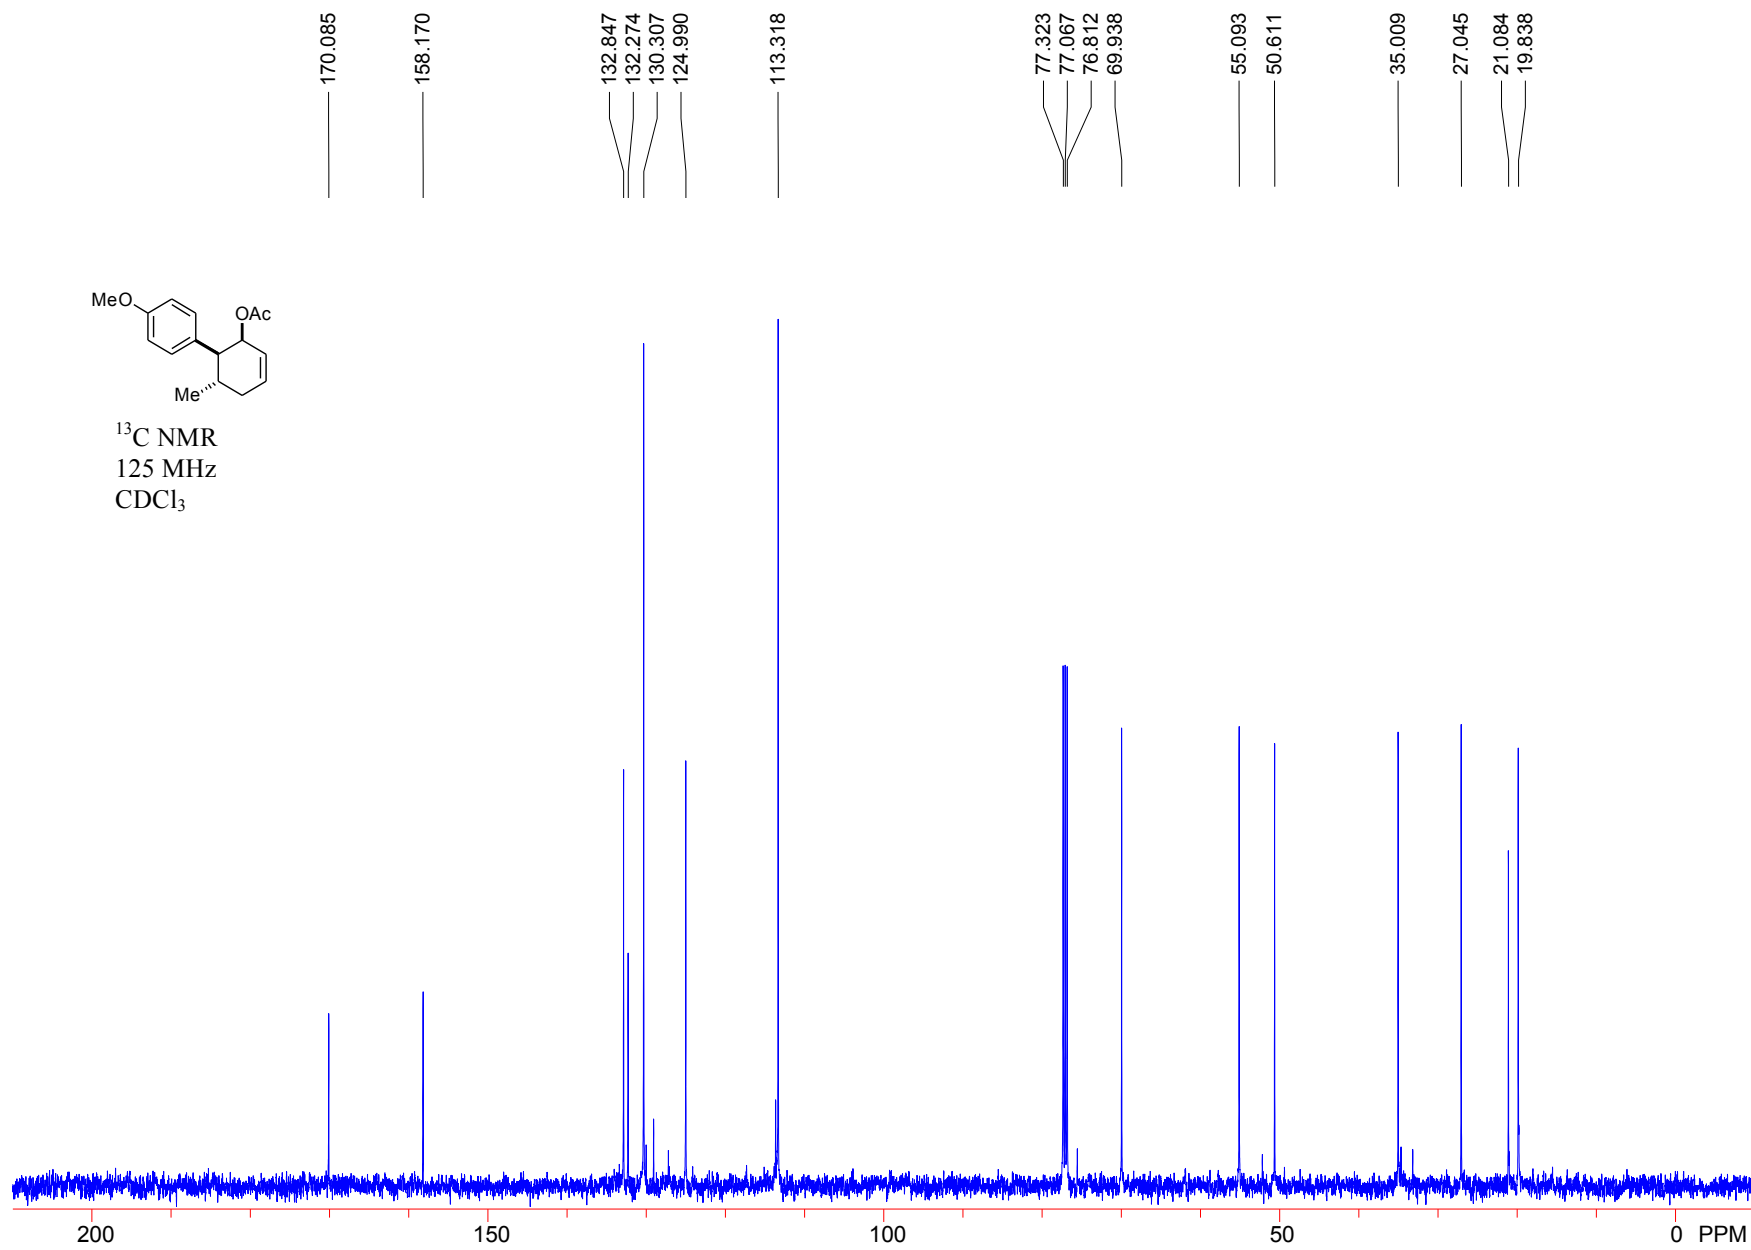



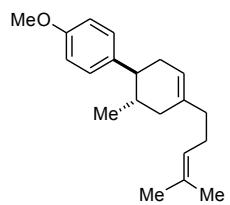

$^1\text{H NMR}$   
500 MHz  
 $\text{CDCl}_3$

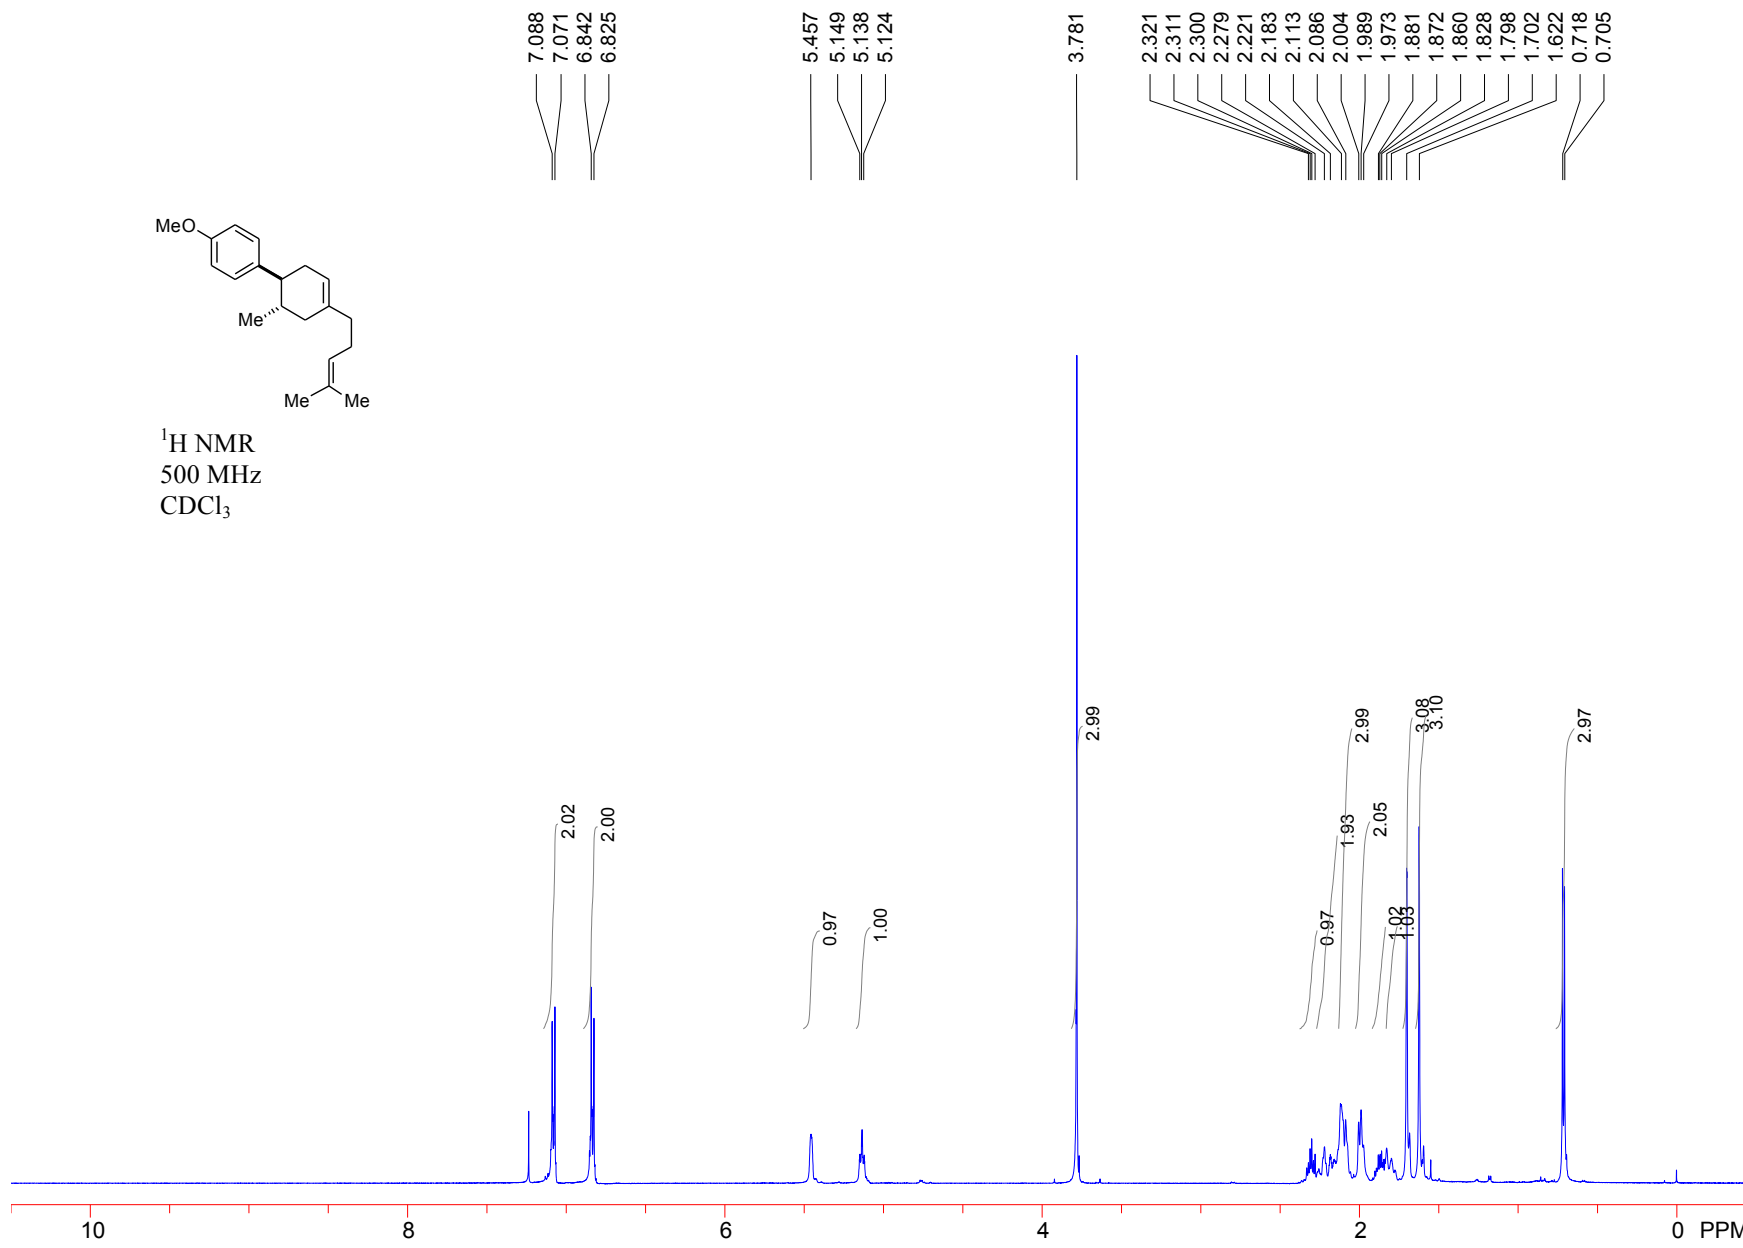

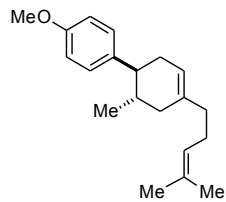

$^{13}\text{C}$  NMR  
125 MHz  
 $\text{CDCl}_3$

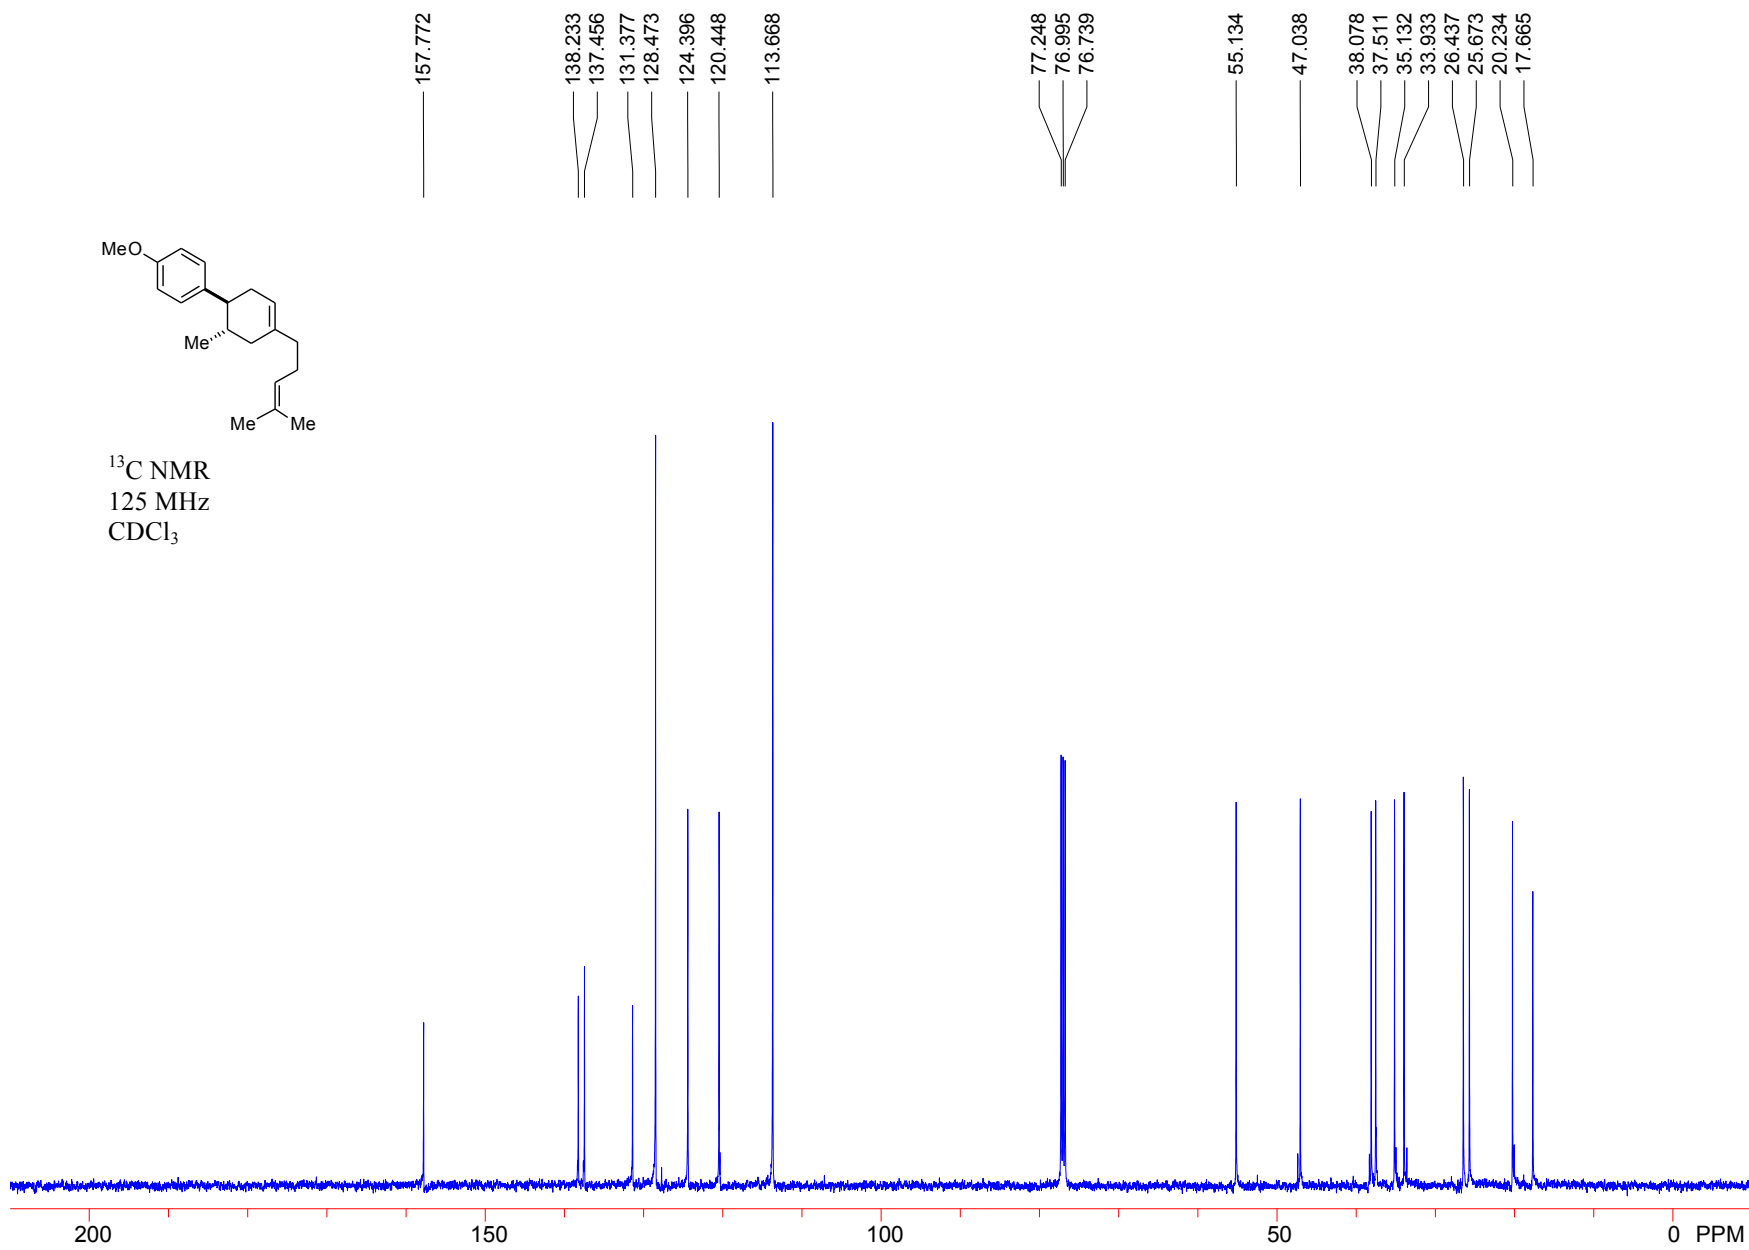

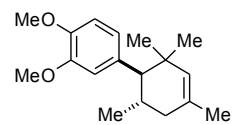

$^1\text{H}$  NMR  
500 MHz  
DMSO

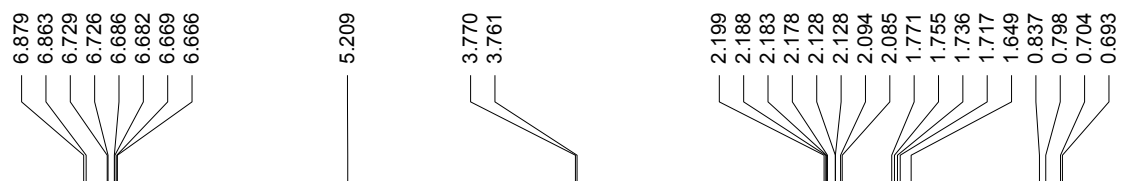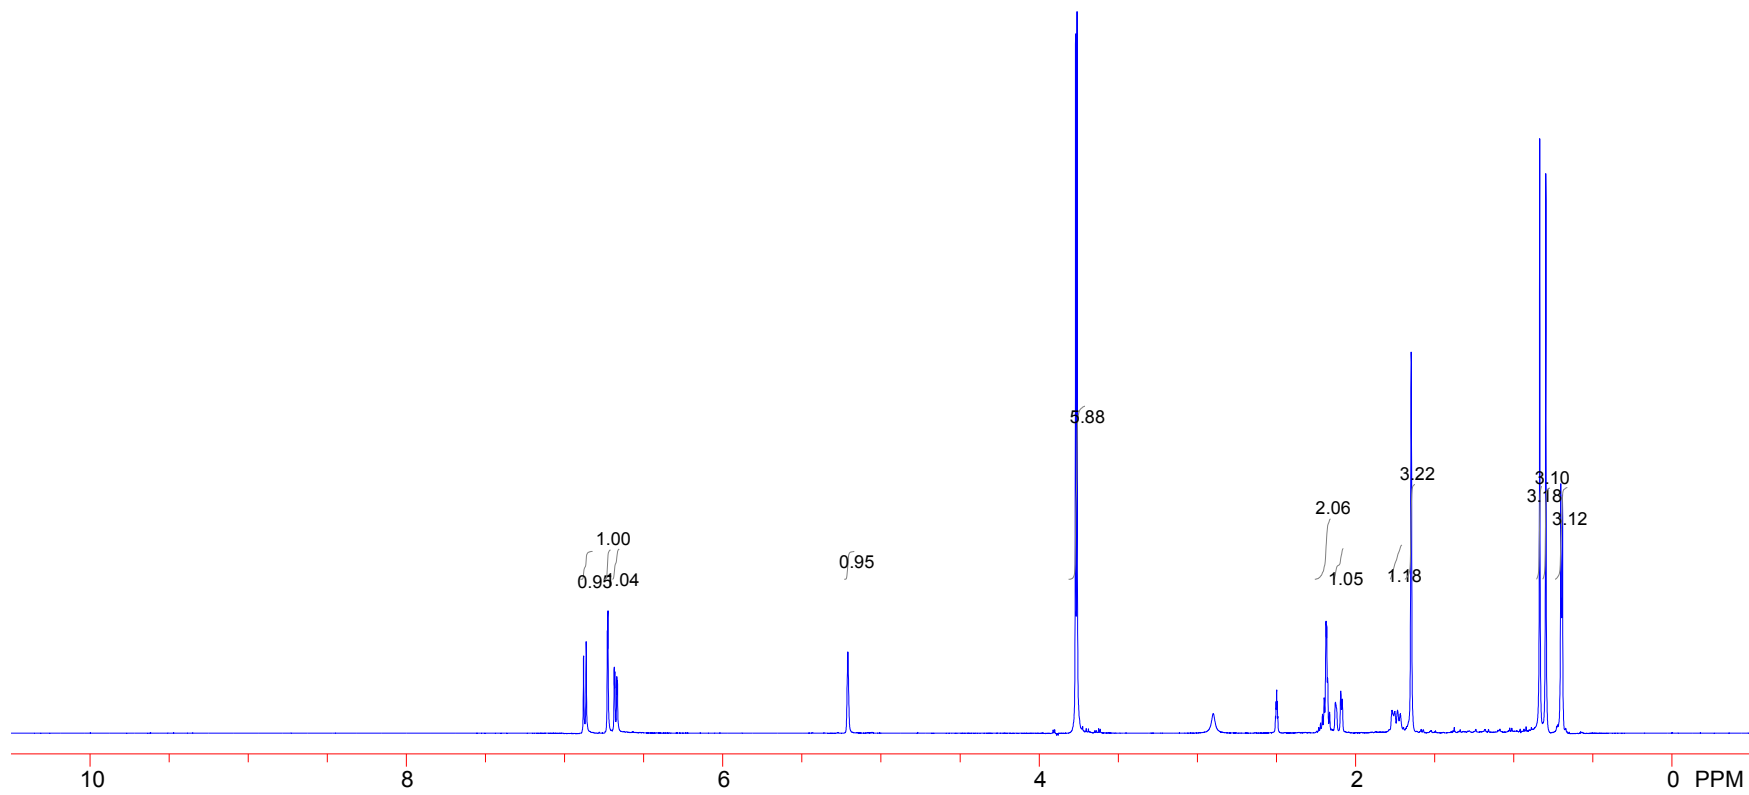

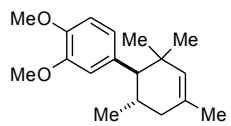

$^{13}\text{C}$  NMR  
125 MHz  
DMSO

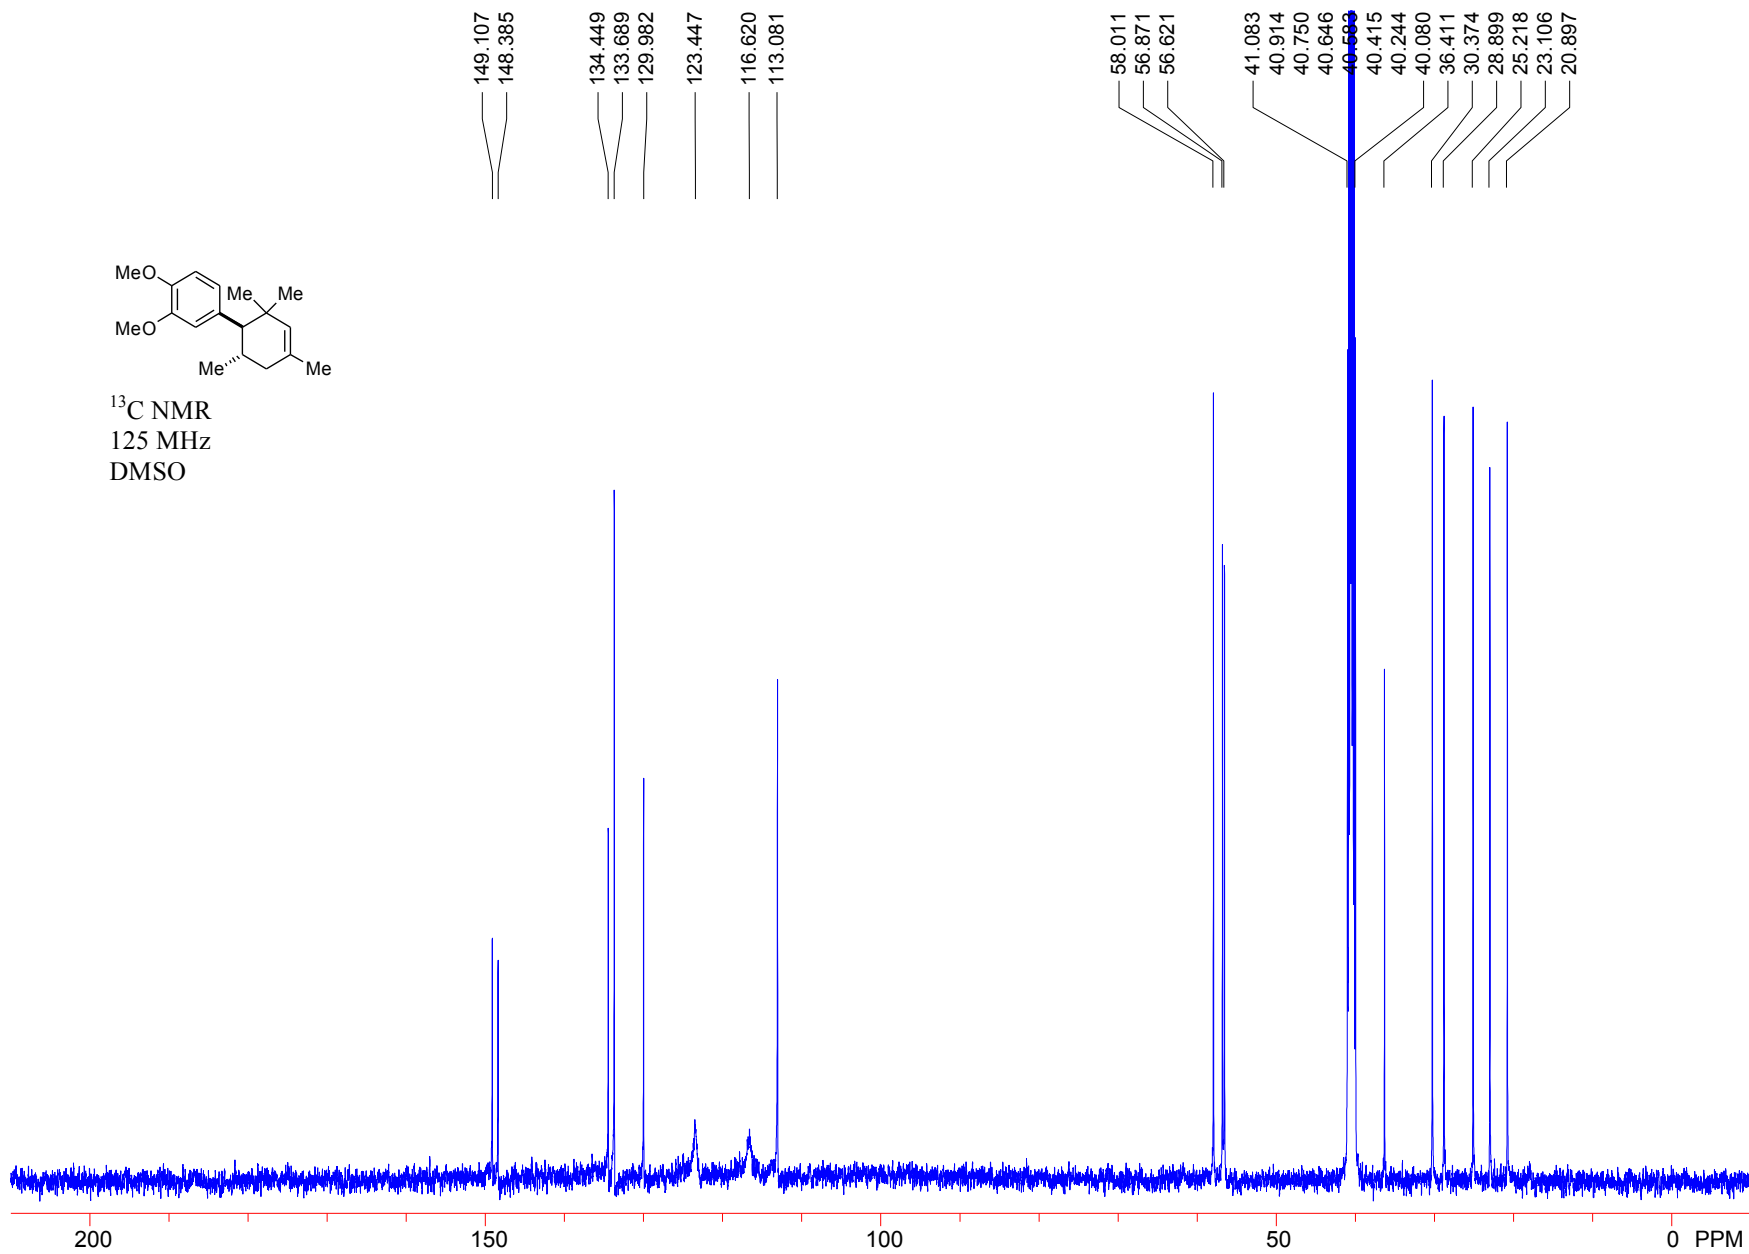

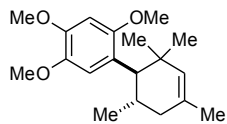

$^1\text{H NMR}$   
500 MHz  
 $\text{CDCl}_3$

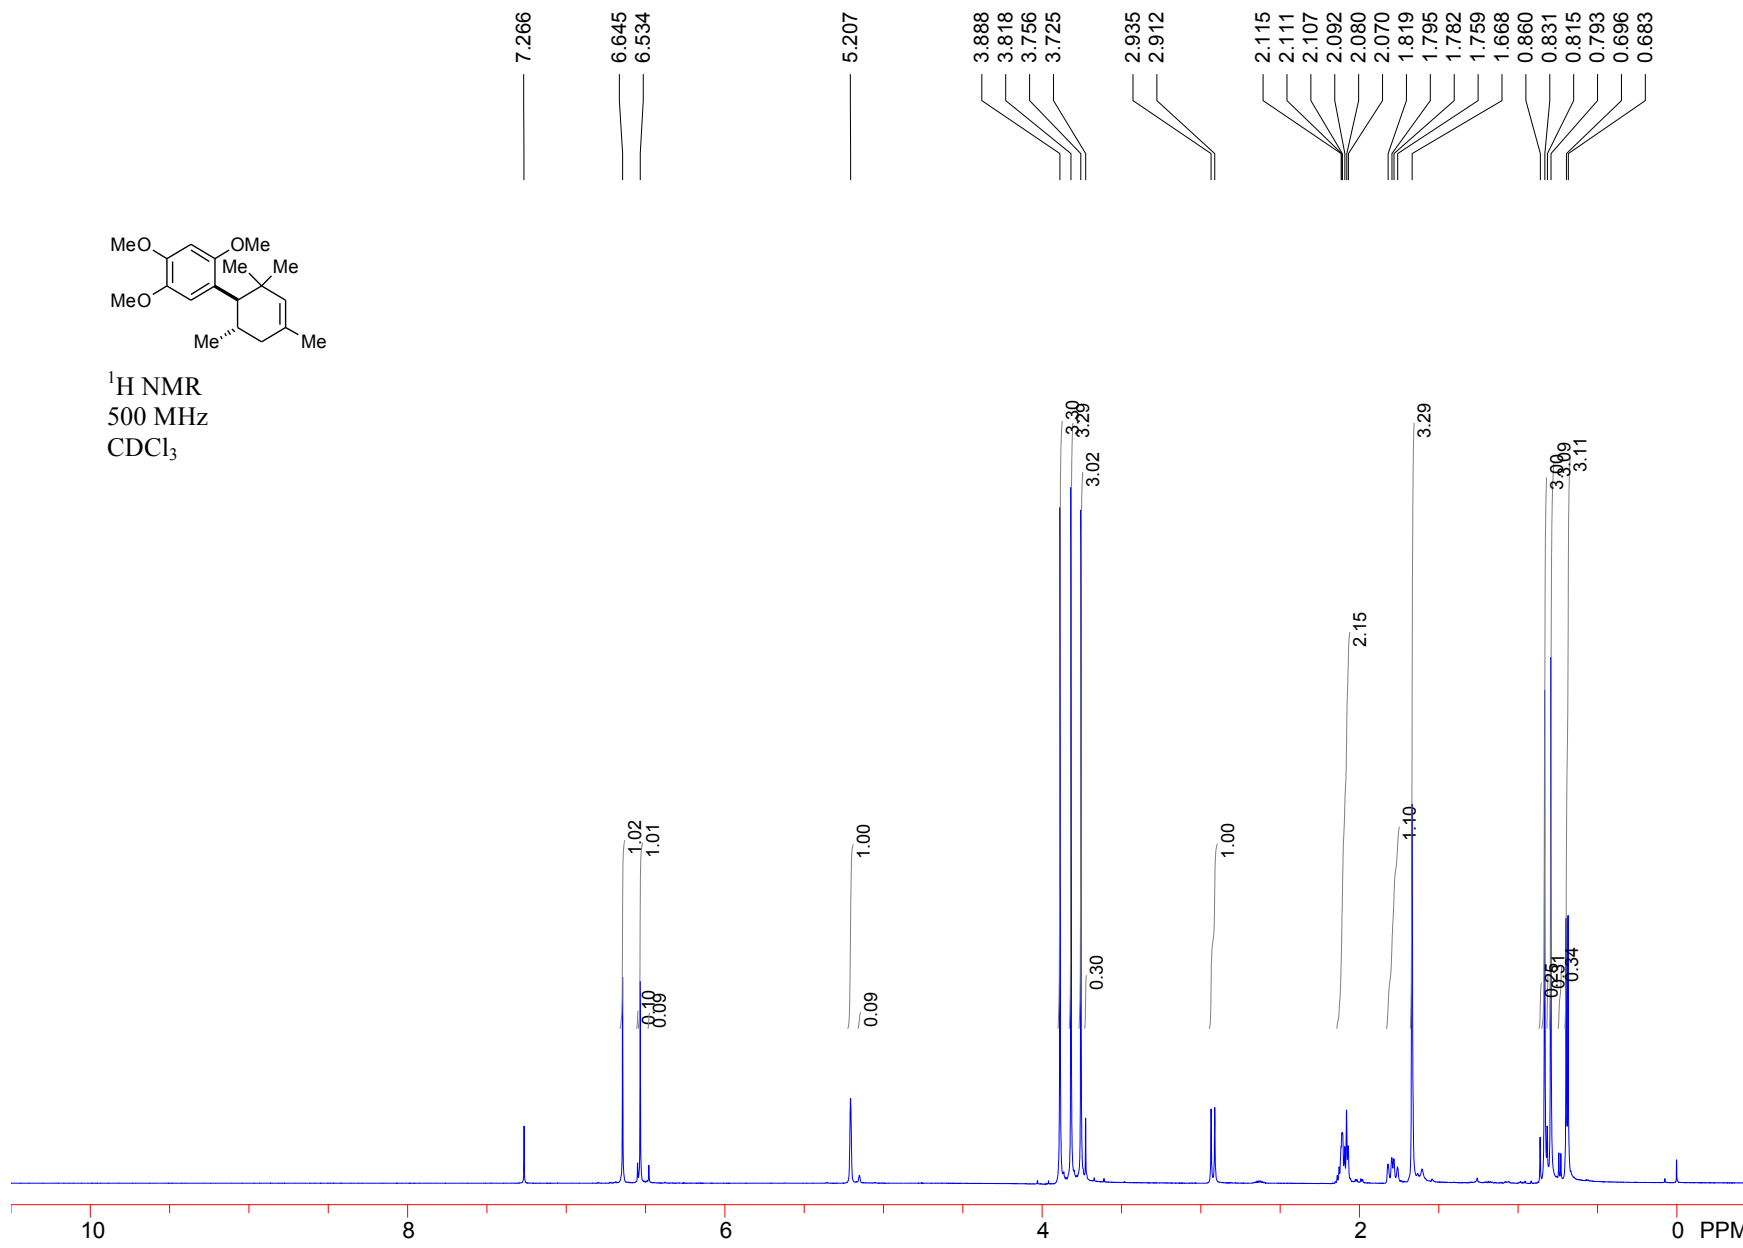

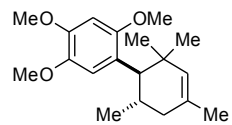

$^{13}\text{C}$  NMR  
125 MHz  
 $\text{CDCl}_3$

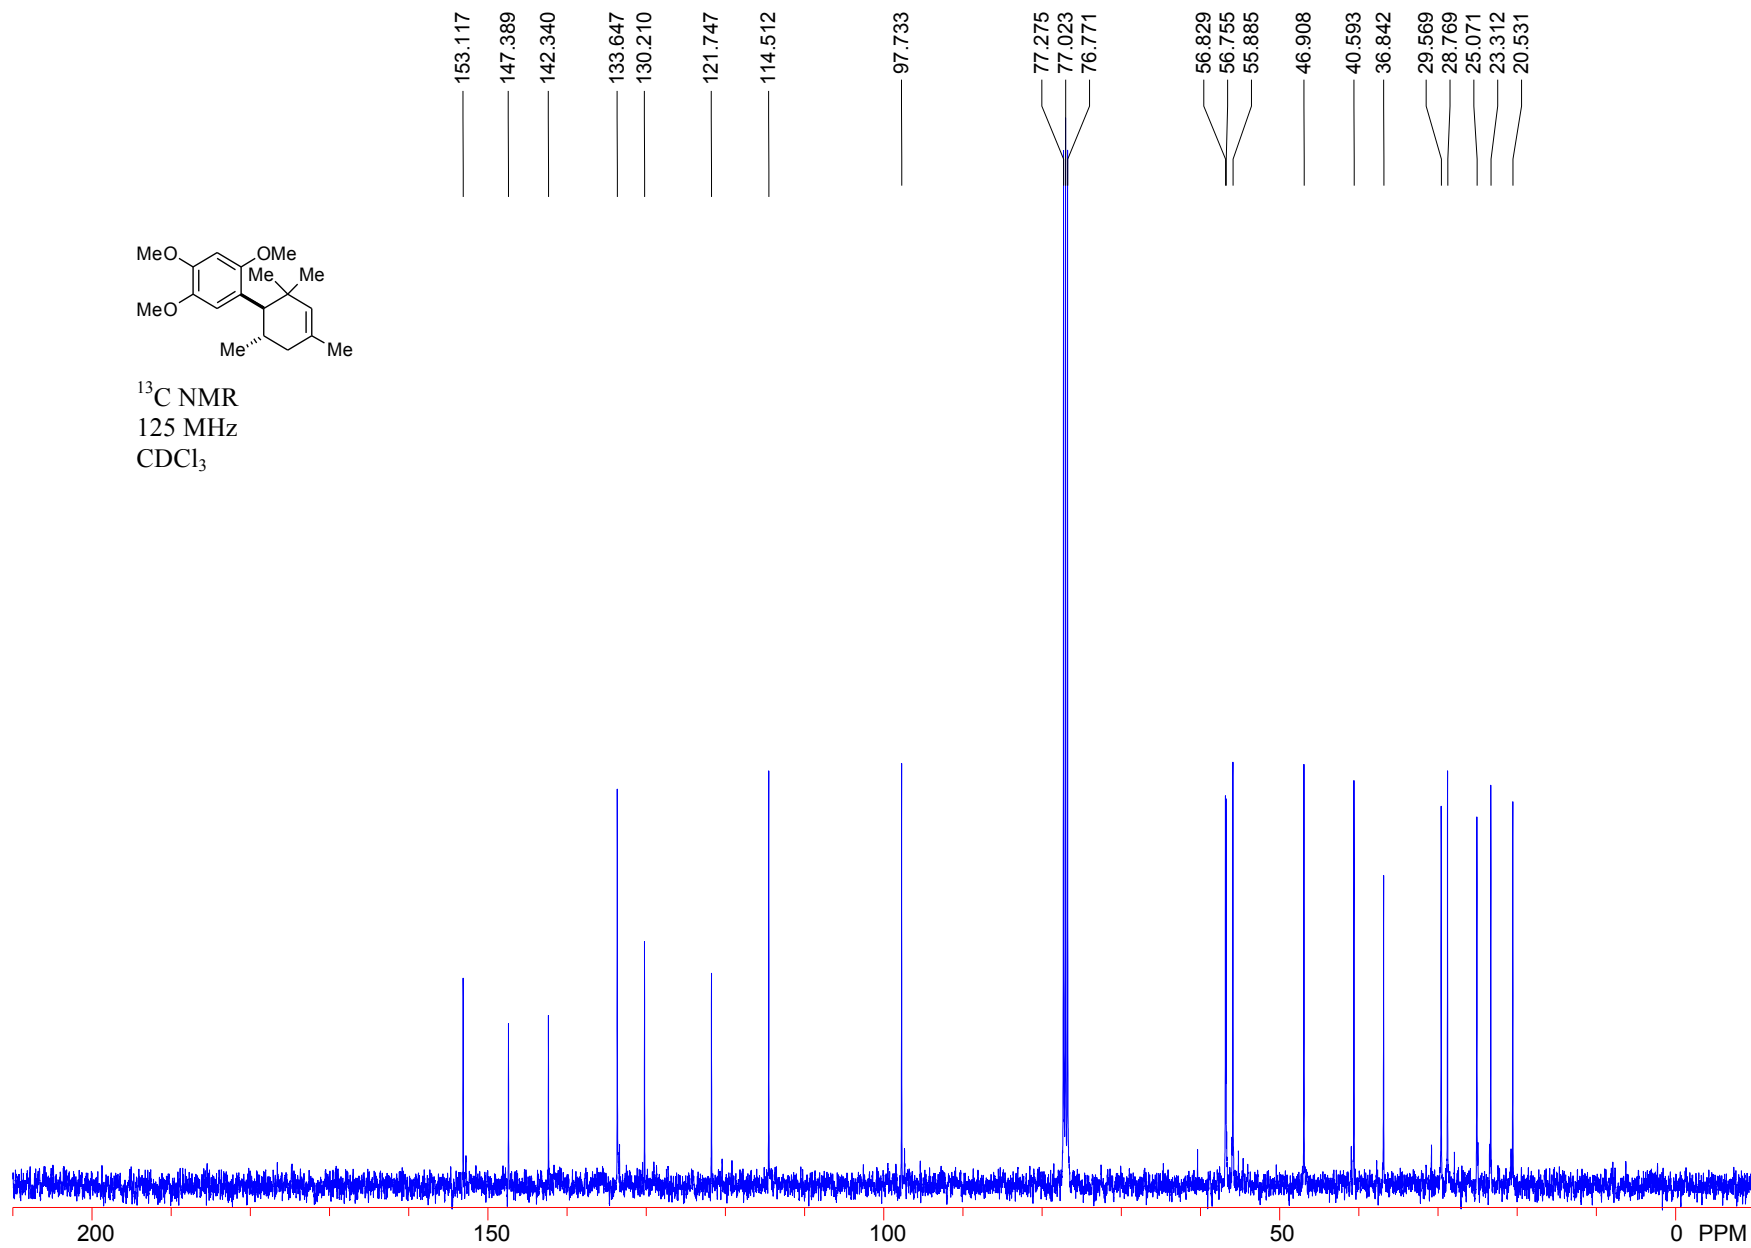

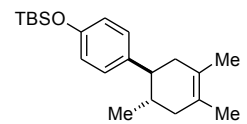

$^1\text{H NMR}$   
500 MHz  
 $\text{CDCl}_3$

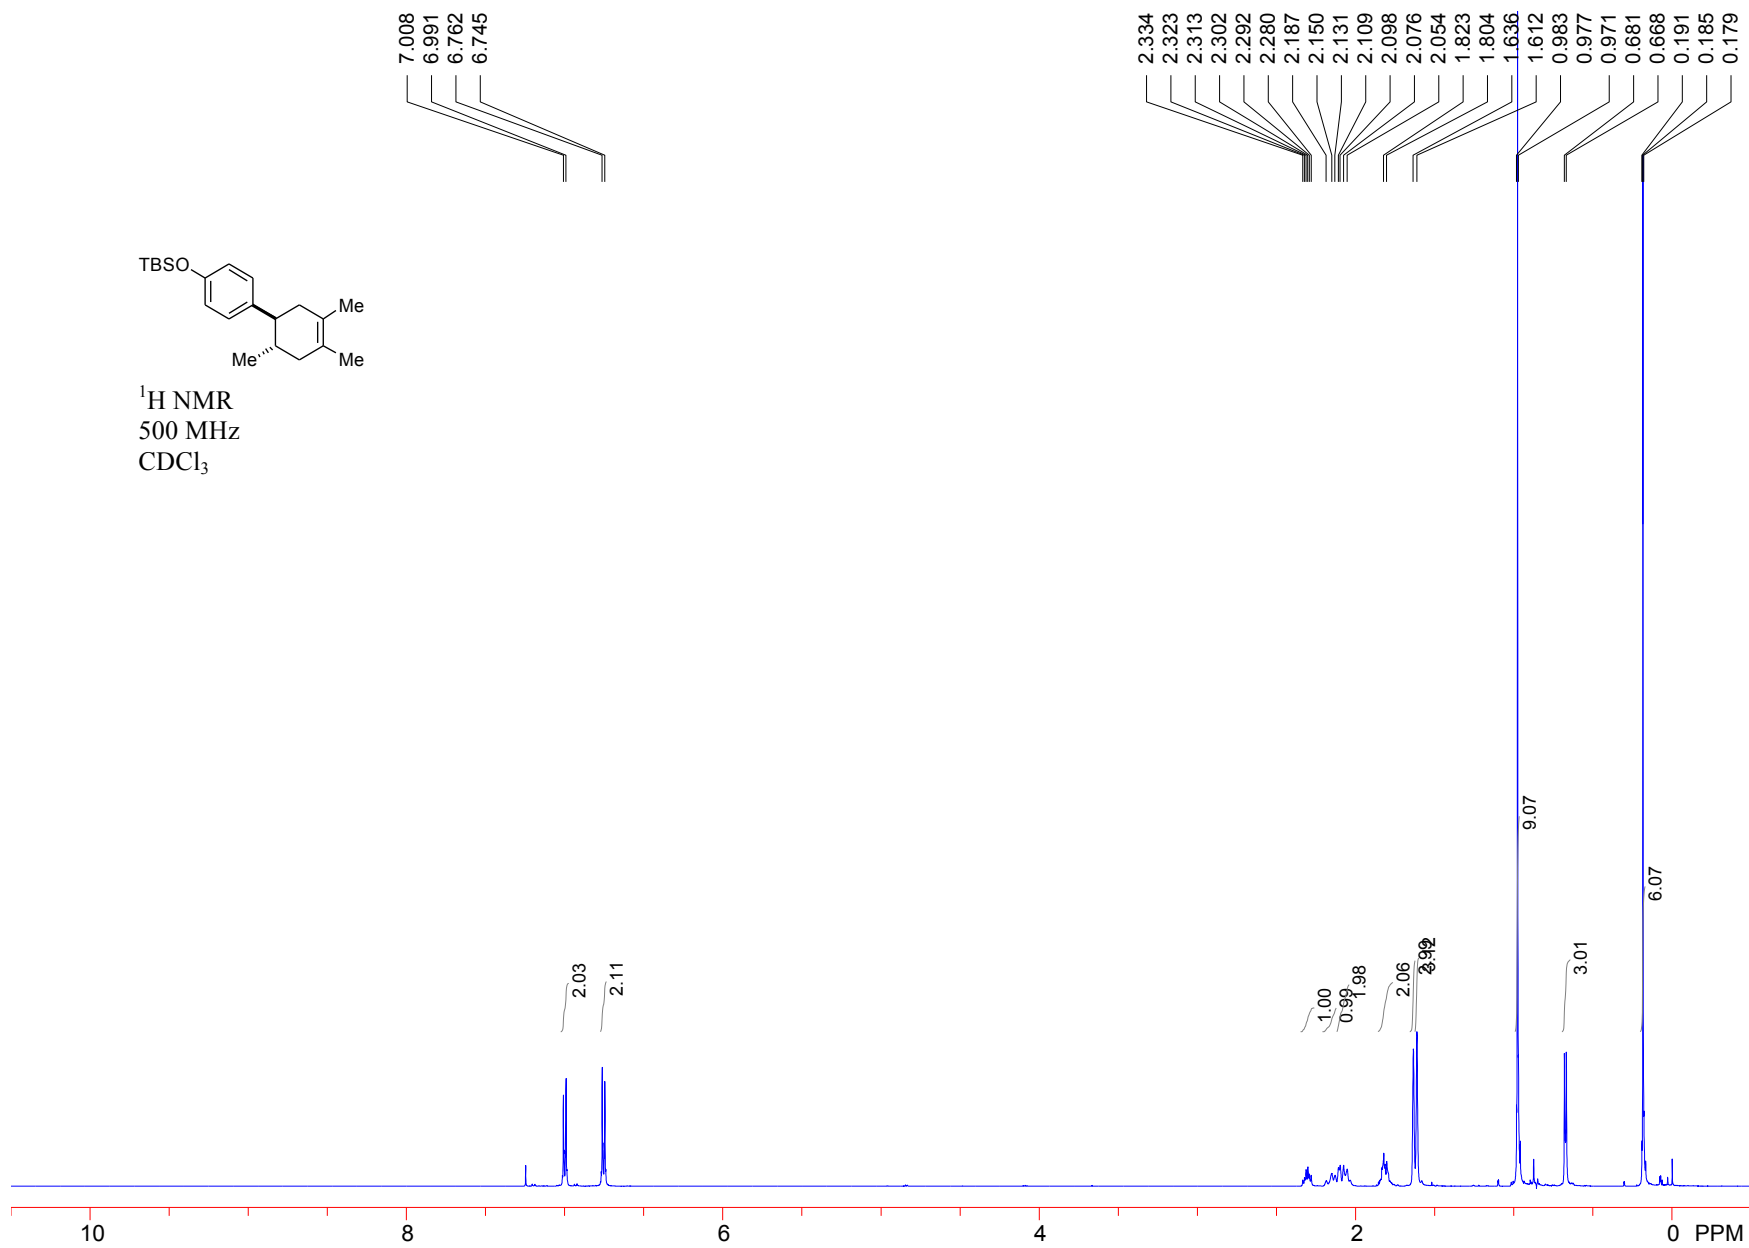

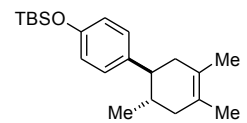

$^{13}\text{C}$  NMR  
125 MHz  
 $\text{CDCl}_3$

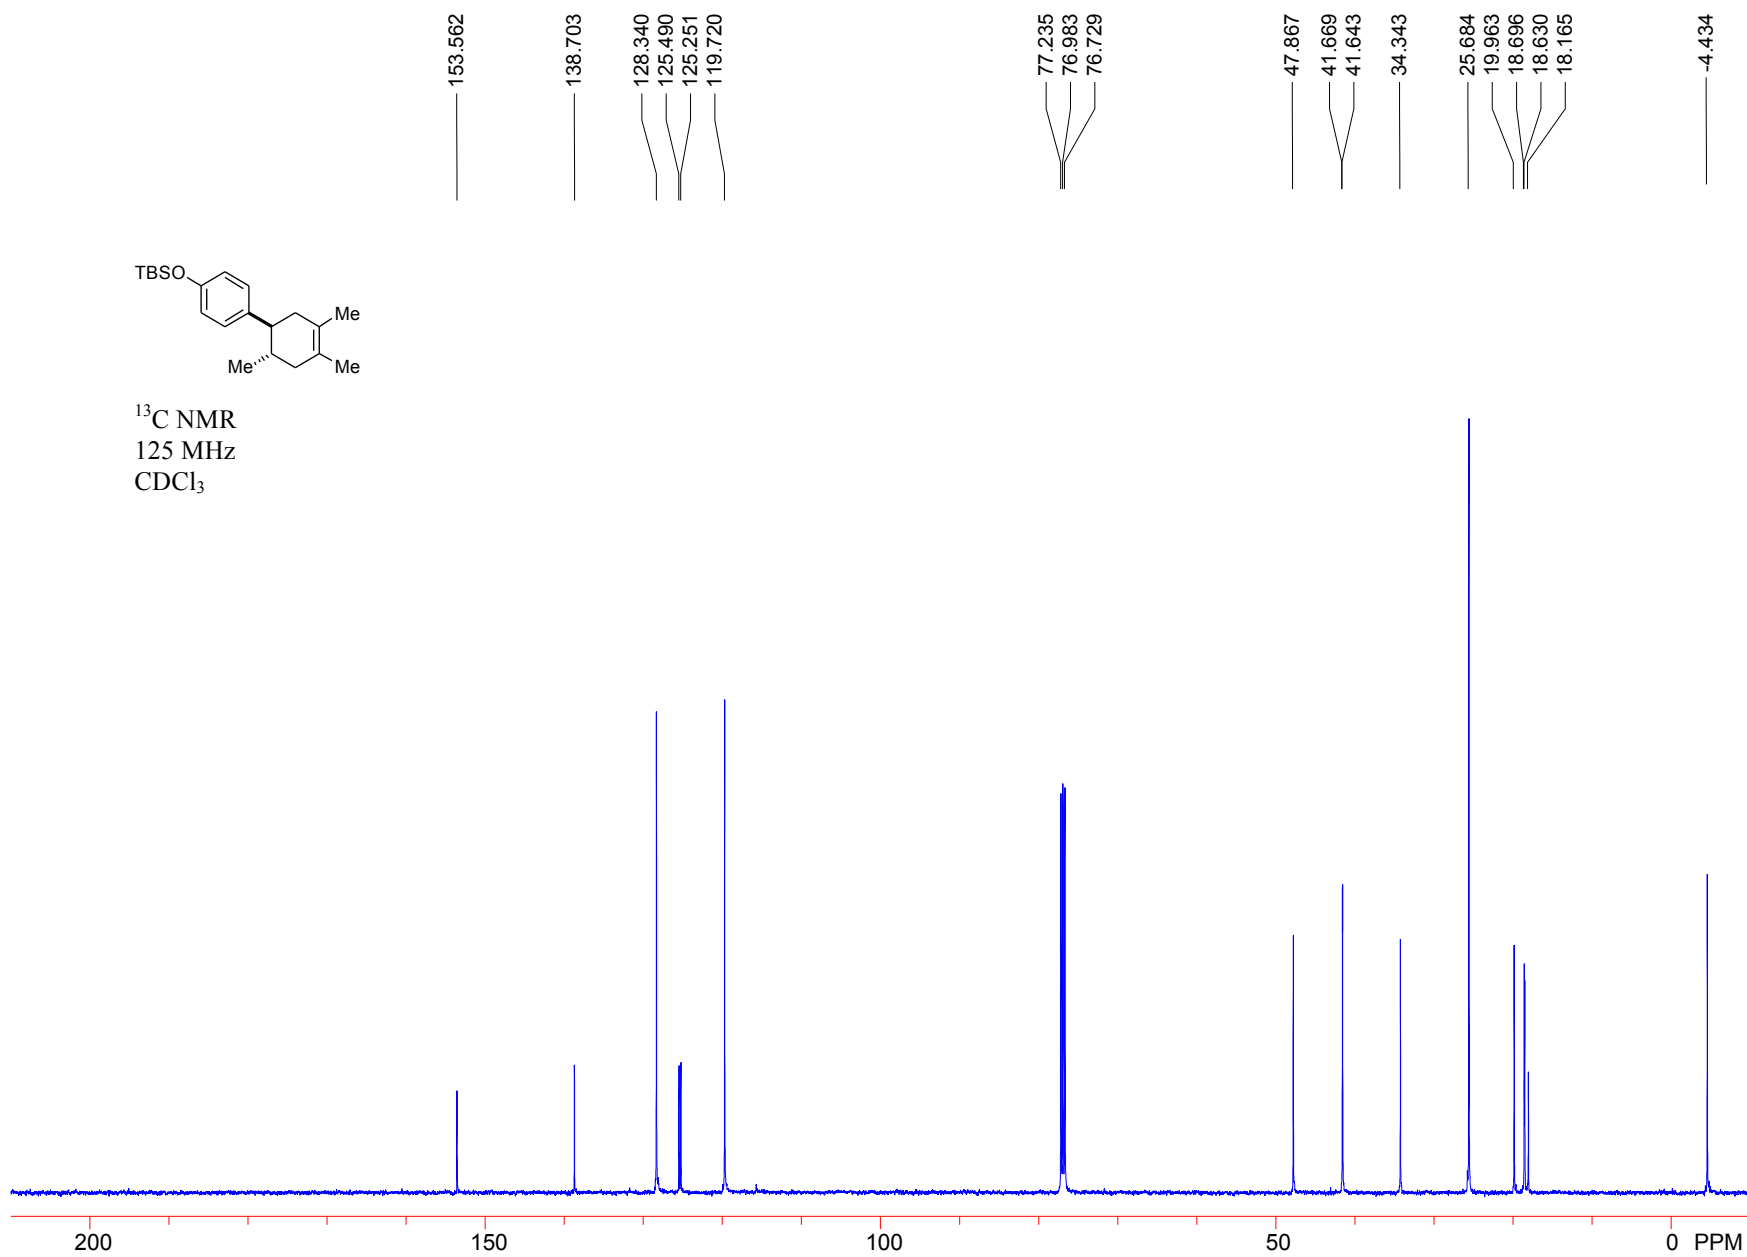



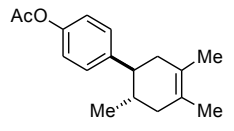

<sup>1</sup>H NMR  
500 MHz  
CDCl<sub>3</sub>

7.258  
7.167  
7.150  
7.009  
6.992

2.419  
2.407  
2.398  
2.386  
2.376  
2.365  
2.285  
2.154  
2.122  
2.110  
2.092  
2.068  
1.884  
1.875  
1.871  
1.863  
1.850  
1.846  
1.818  
1.795  
1.641  
1.614  
0.709  
0.696

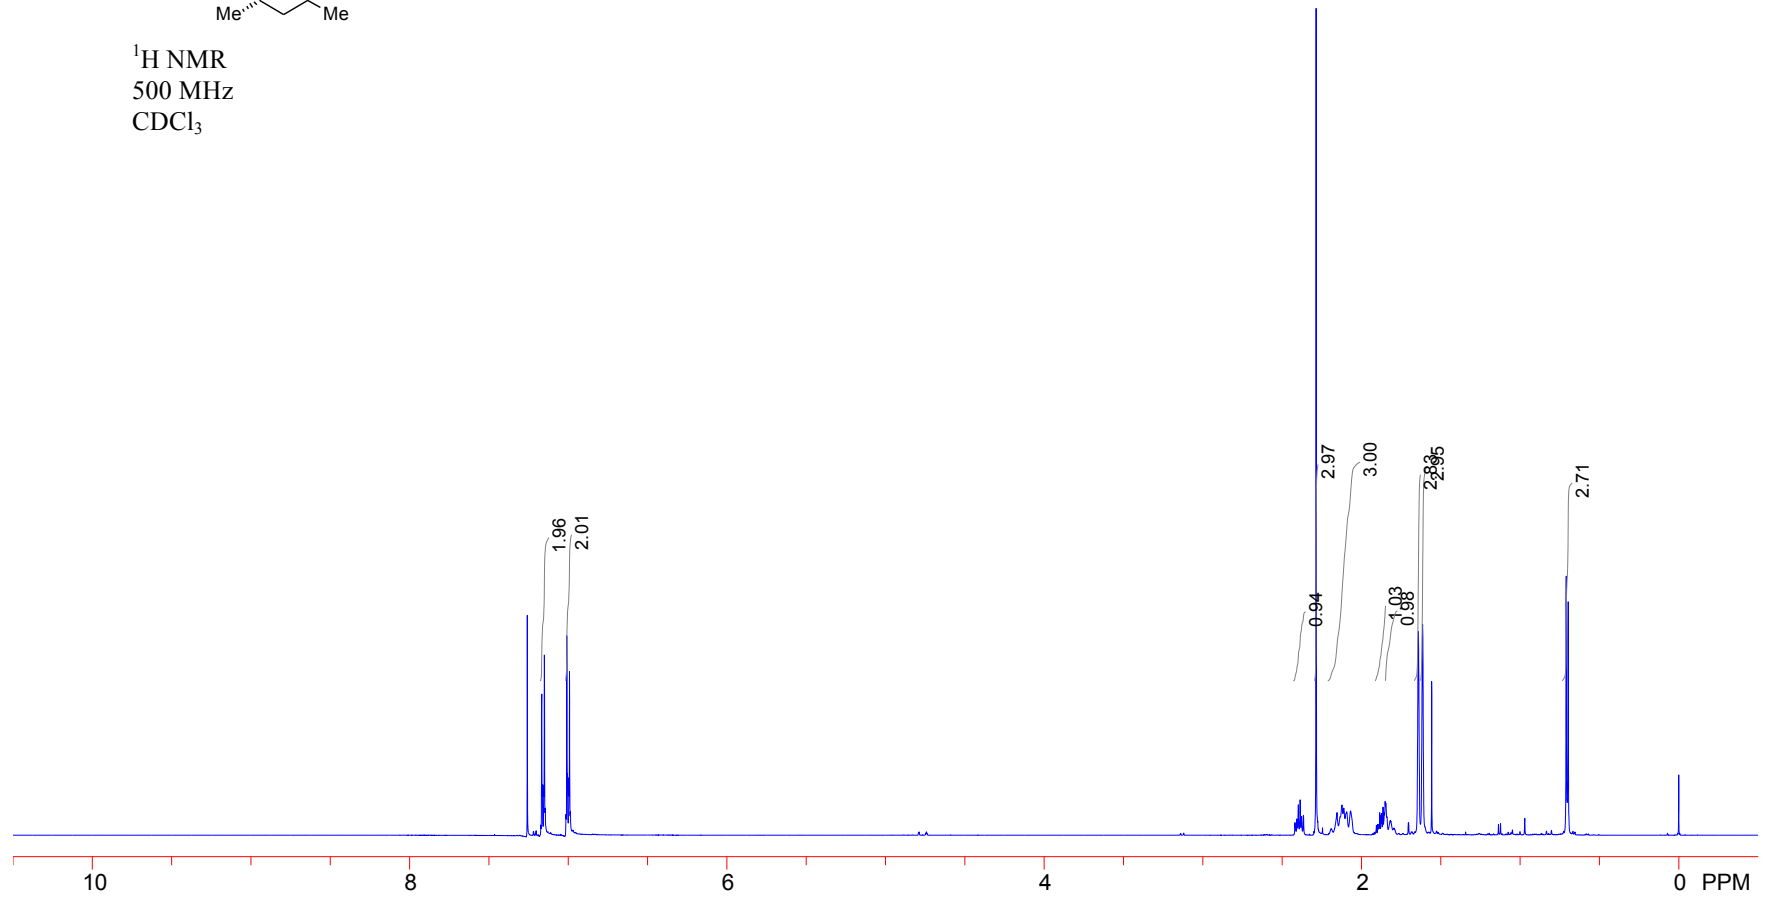

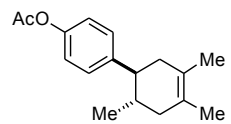

$^{13}\text{C}$  NMR  
125 MHz  
 $\text{CDCl}_3$

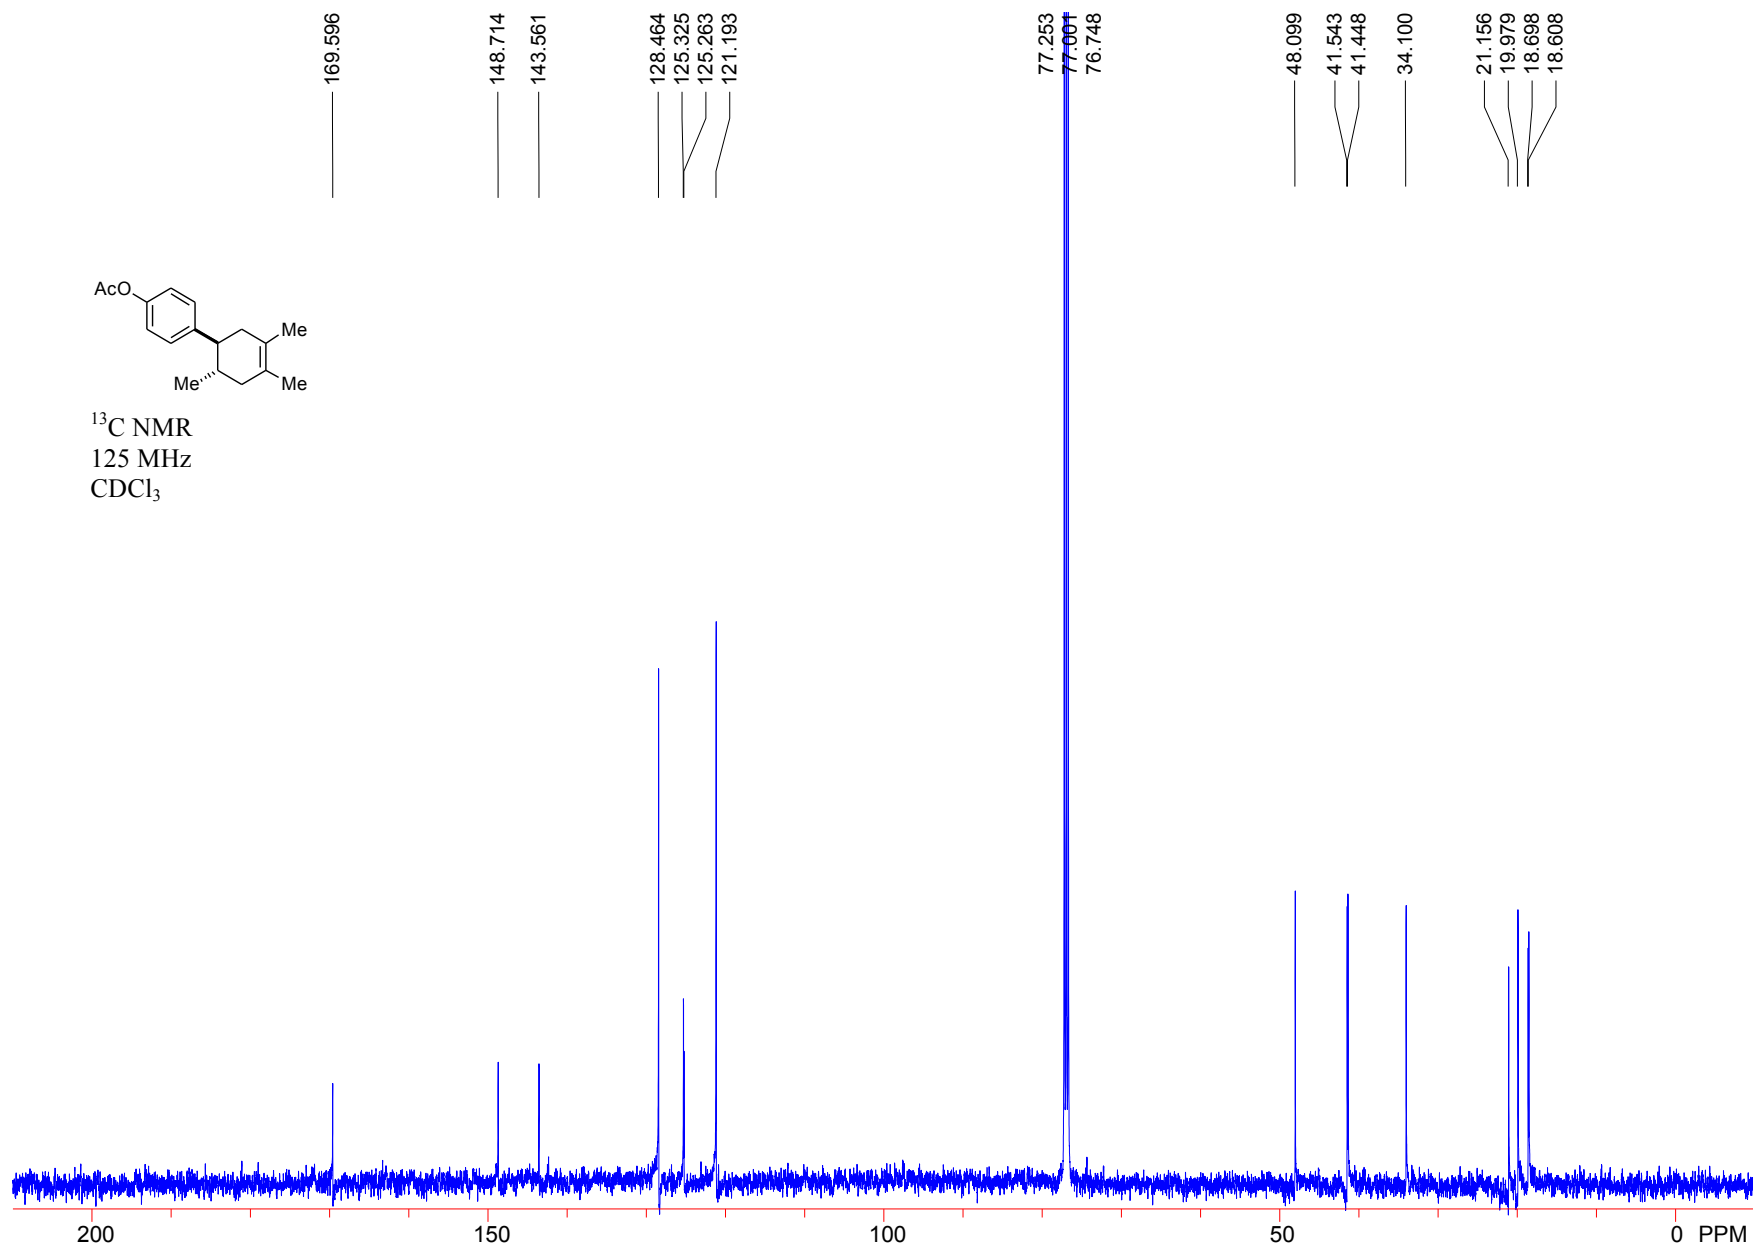

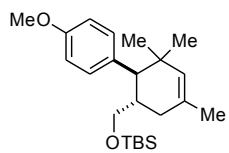

$^1\text{H NMR}$   
500 MHz  
 $\text{CDCl}_3$

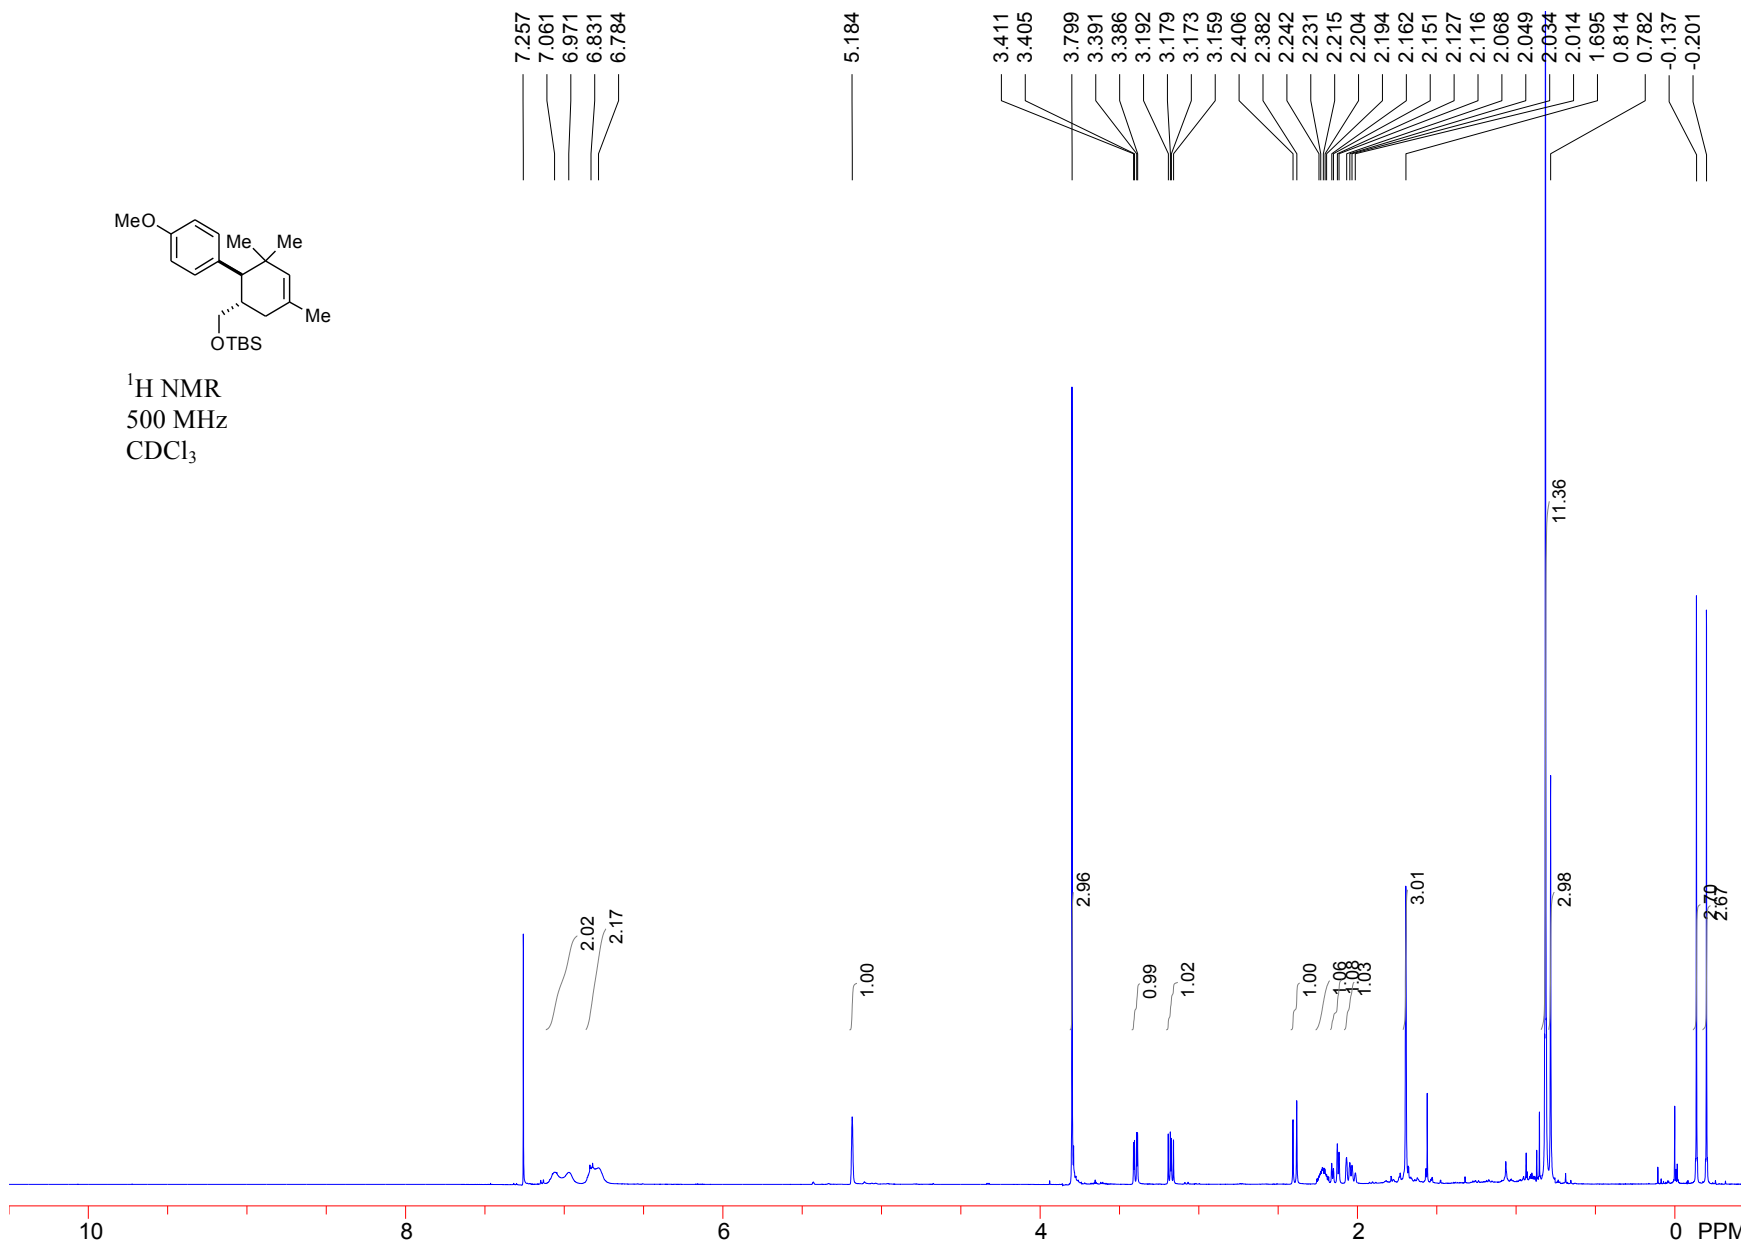

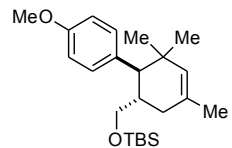

<sup>13</sup>C NMR  
125 MHz  
CDCl<sub>3</sub>

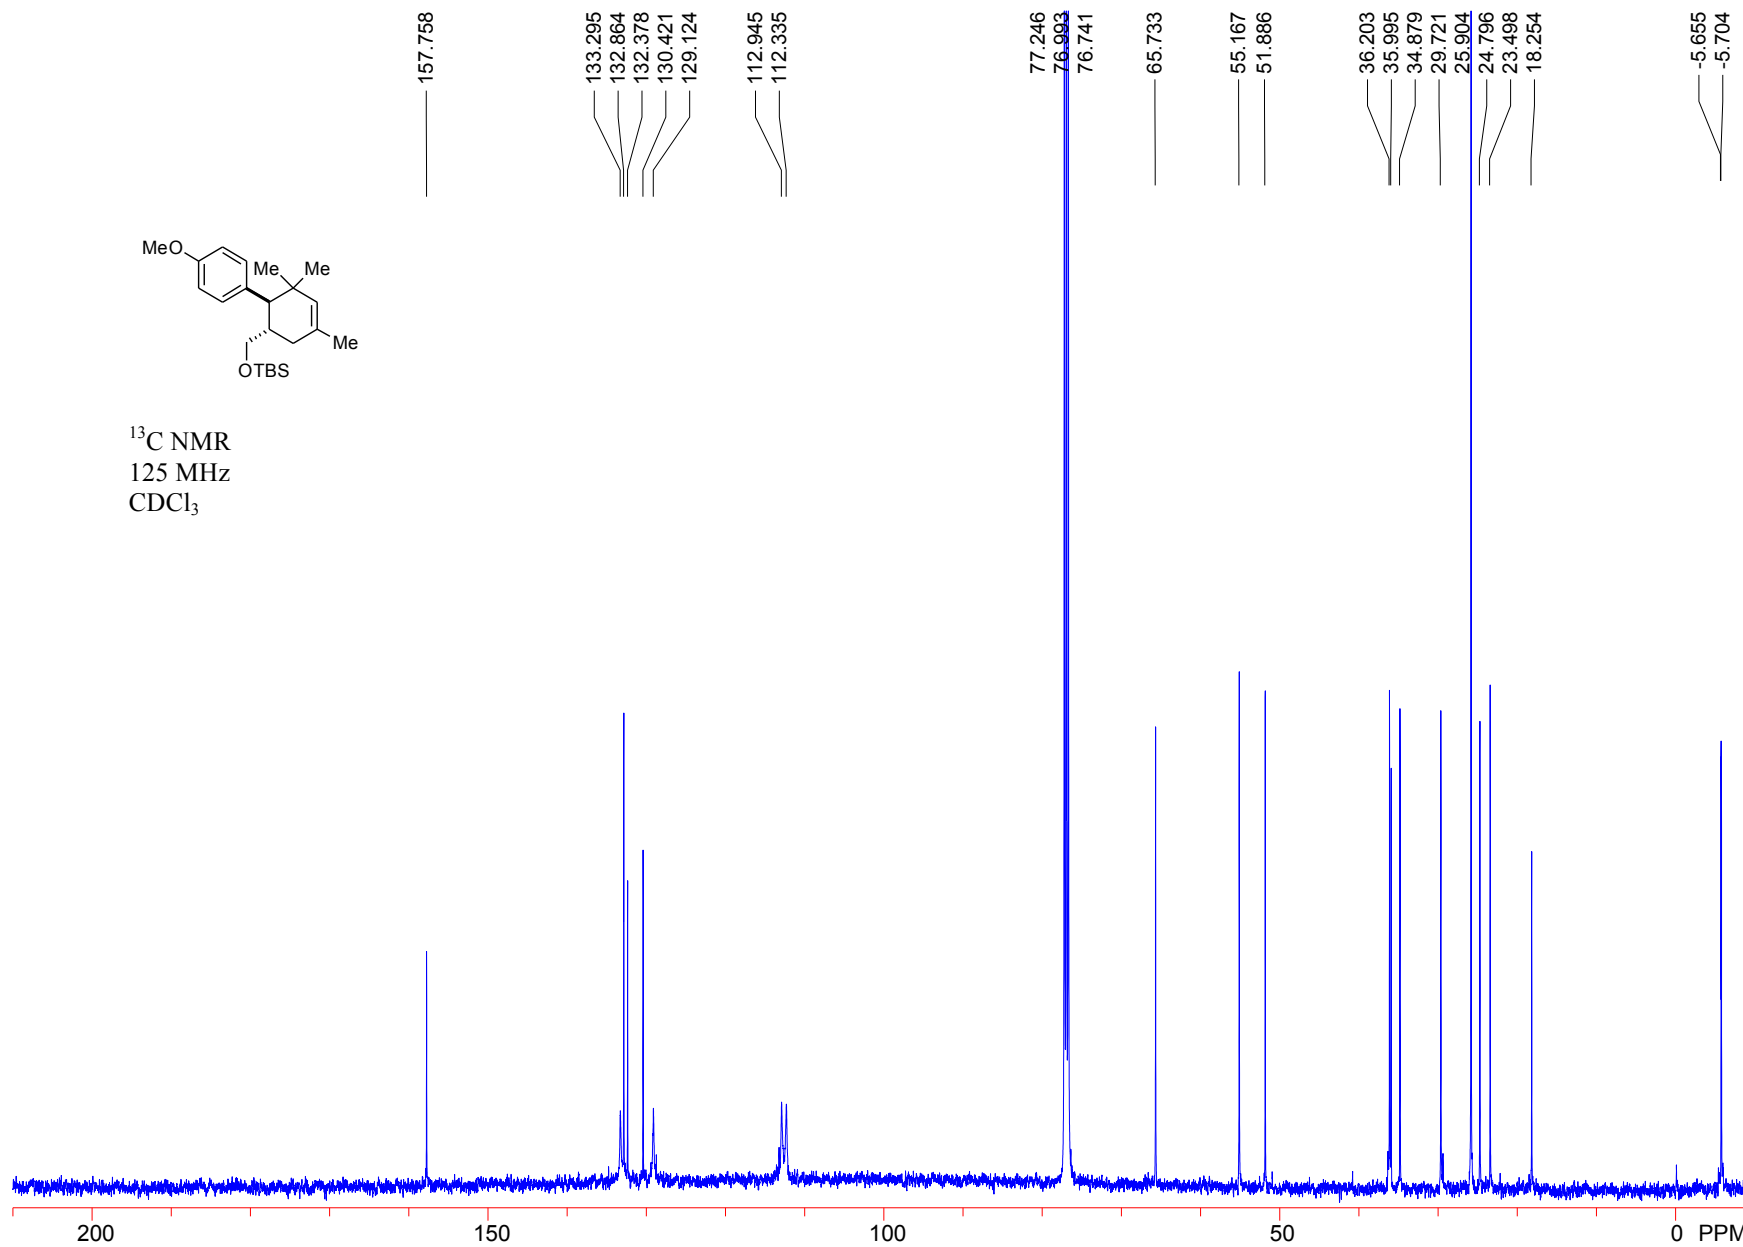

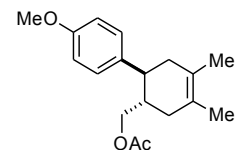

<sup>1</sup>H NMR  
500 MHz  
CDCl<sub>3</sub>

7.093  
7.089  
7.079  
7.076  
6.837  
6.834  
6.824  
6.820

3.901  
3.894  
3.879  
3.871  
3.776  
3.670  
3.656  
3.648  
3.634  
2.630  
2.618  
2.609  
2.597  
2.587  
2.576  
2.236  
2.205  
2.181  
2.144  
2.138  
2.114  
2.112  
1.965  
1.659  
1.625

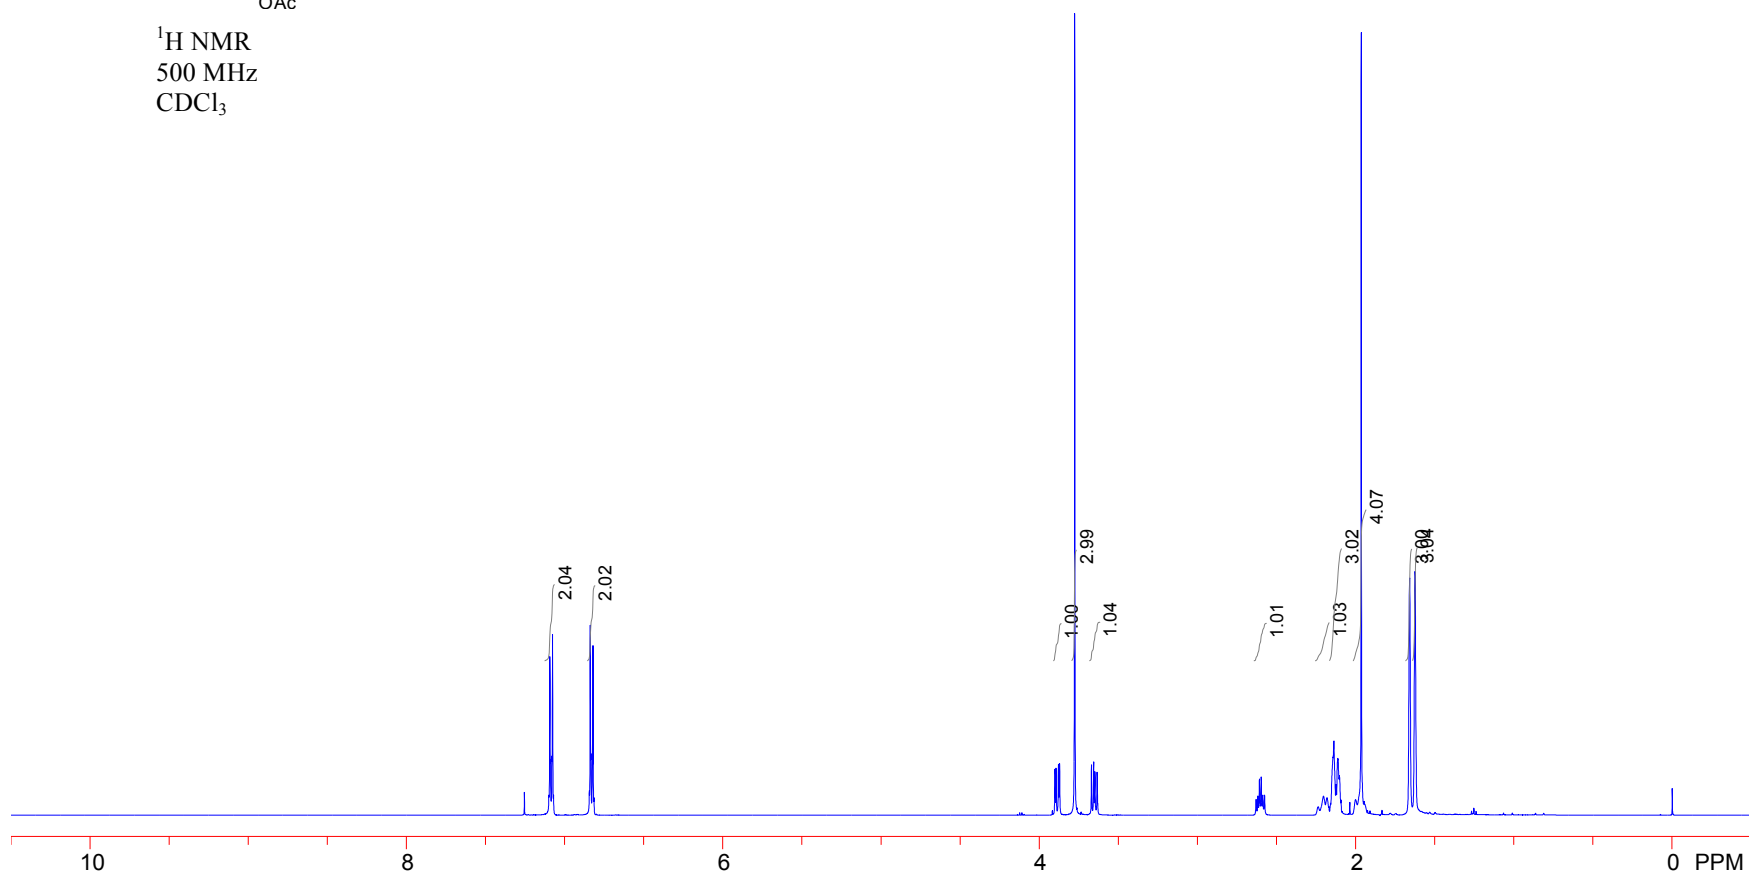

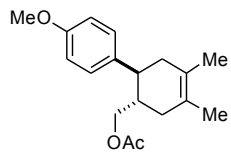

$^{13}\text{C}$  NMR  
125 MHz  
 $\text{CDCl}_3$

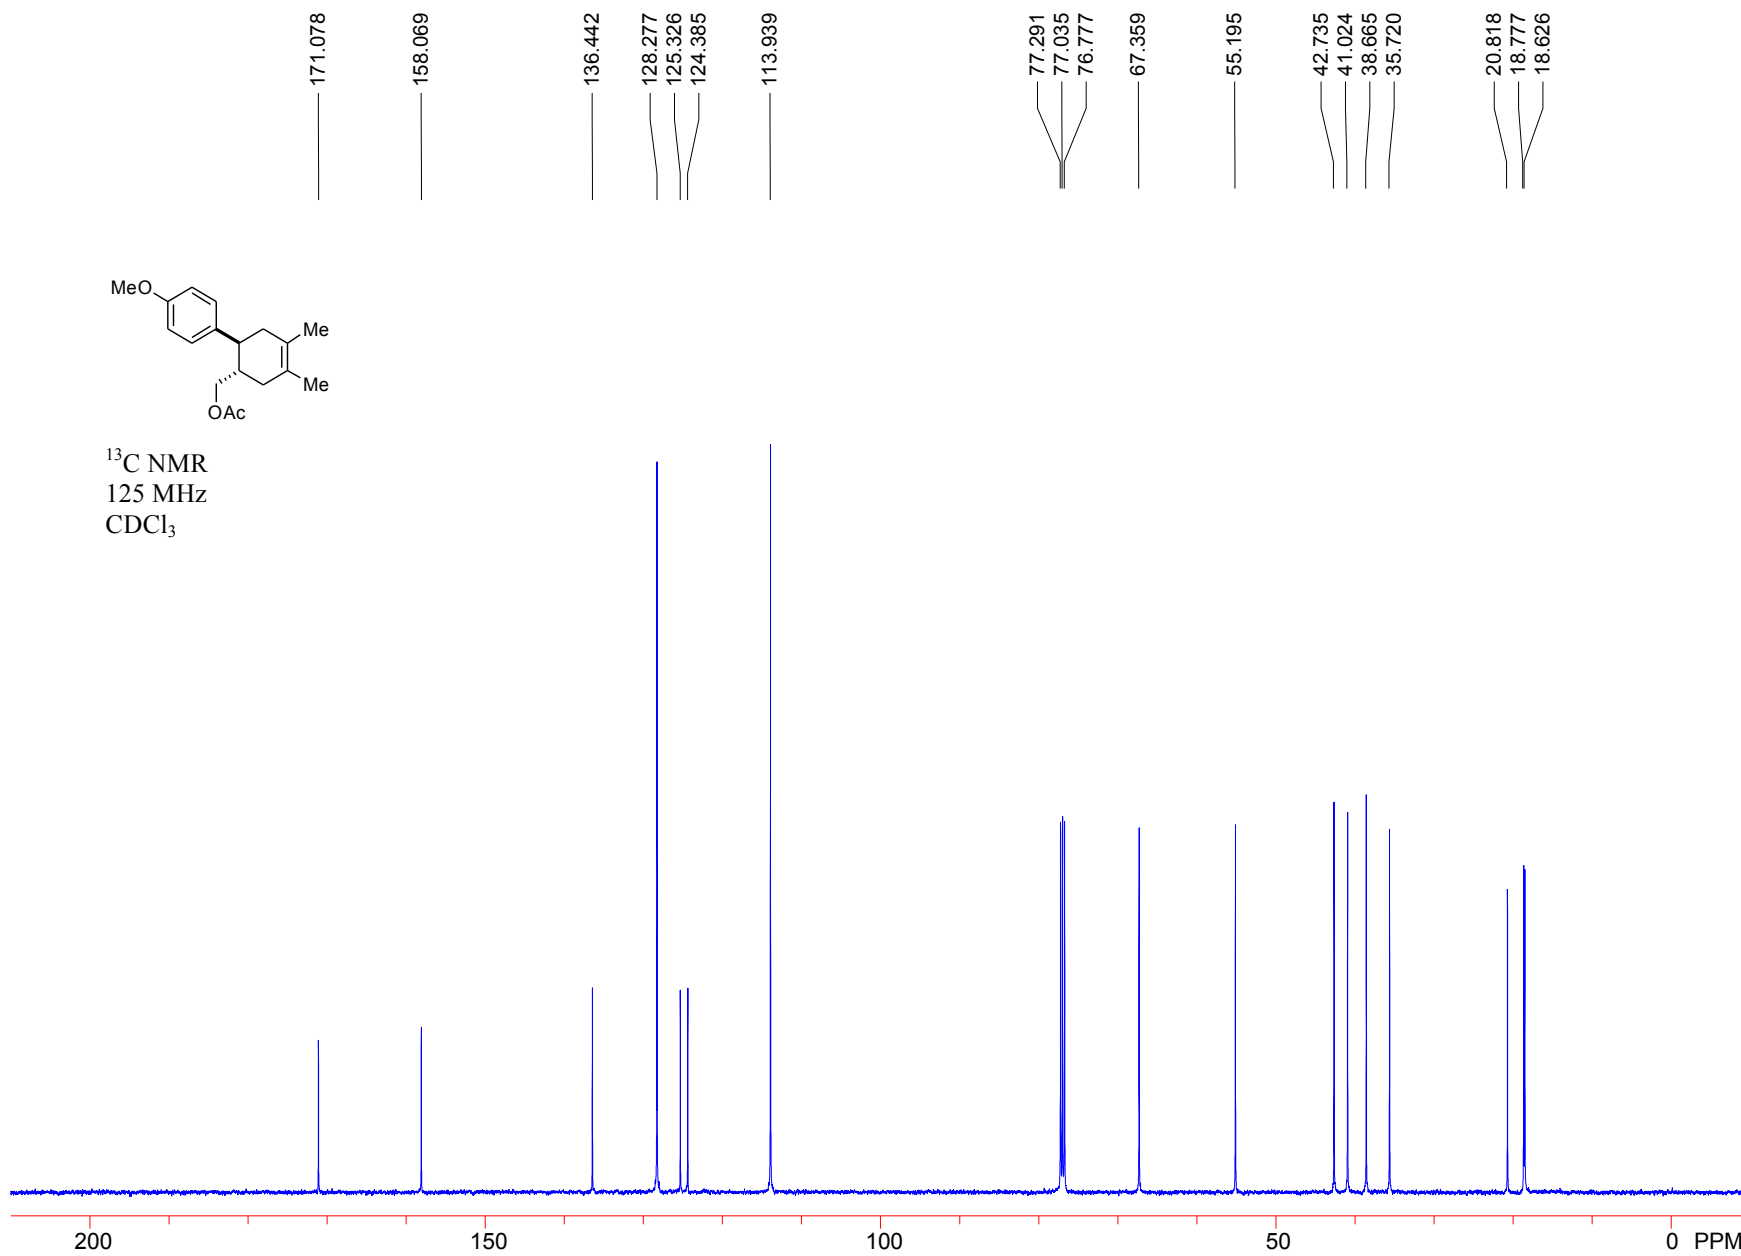

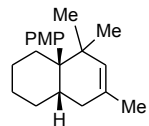

$^1\text{H}$  NMR  
500 MHz  
 $\text{CDCl}_3$

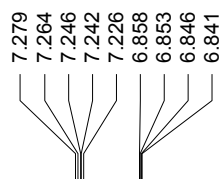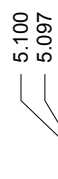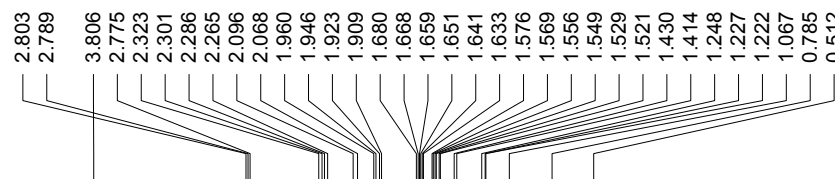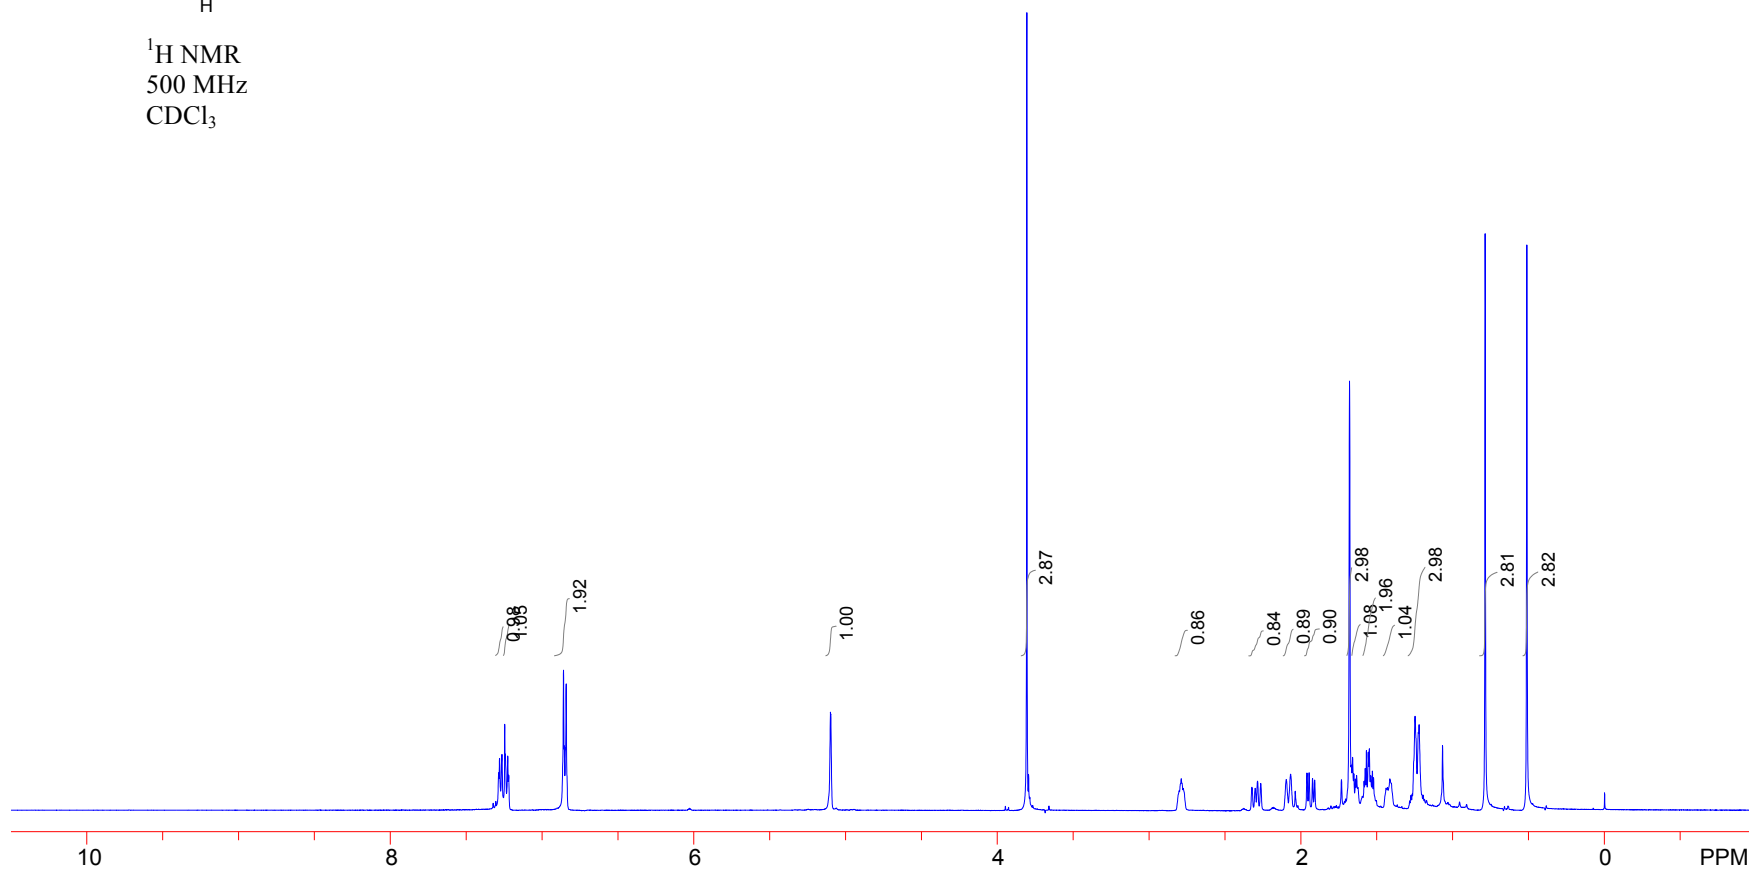

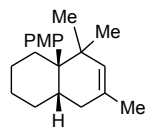

$^{13}\text{C}$  NMR  
125 MHz  
 $\text{CDCl}_3$

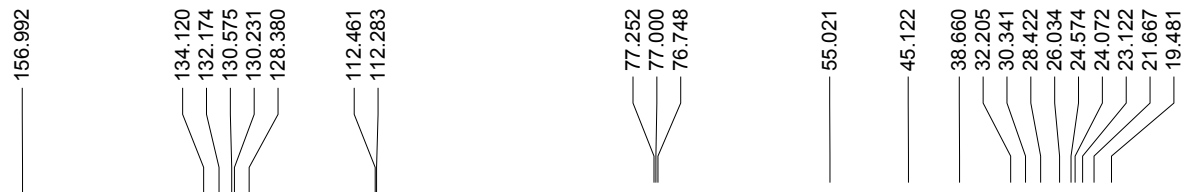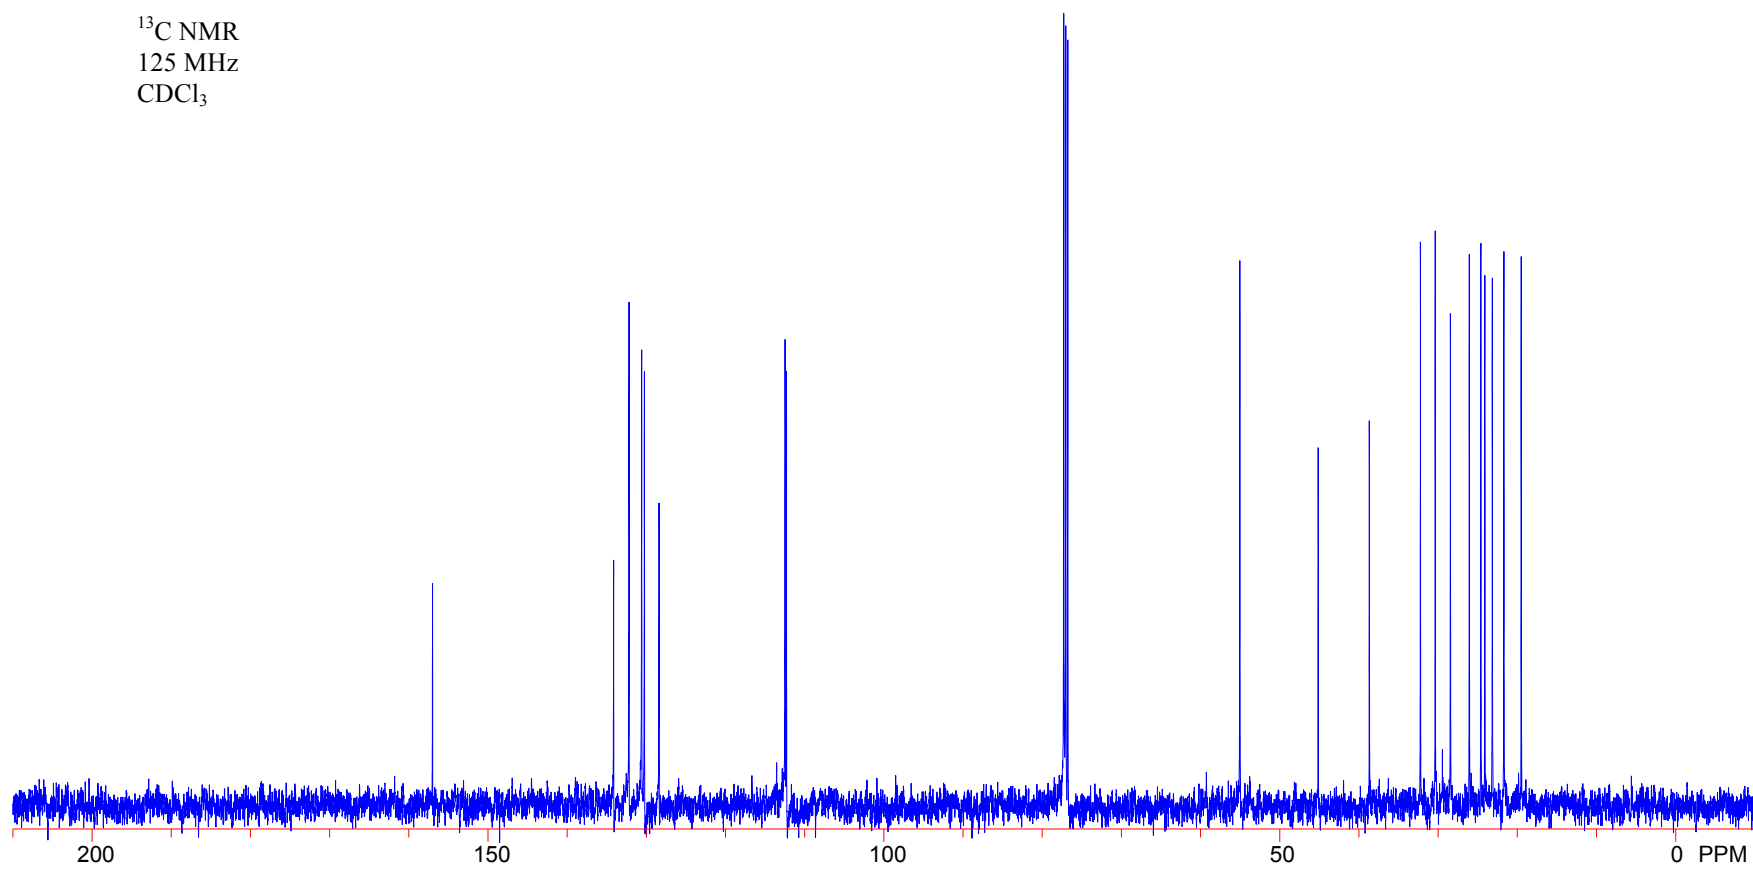



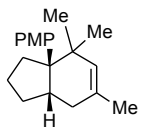

$^1\text{H NMR}$   
500 MHz  
 $\text{CDCl}_3$

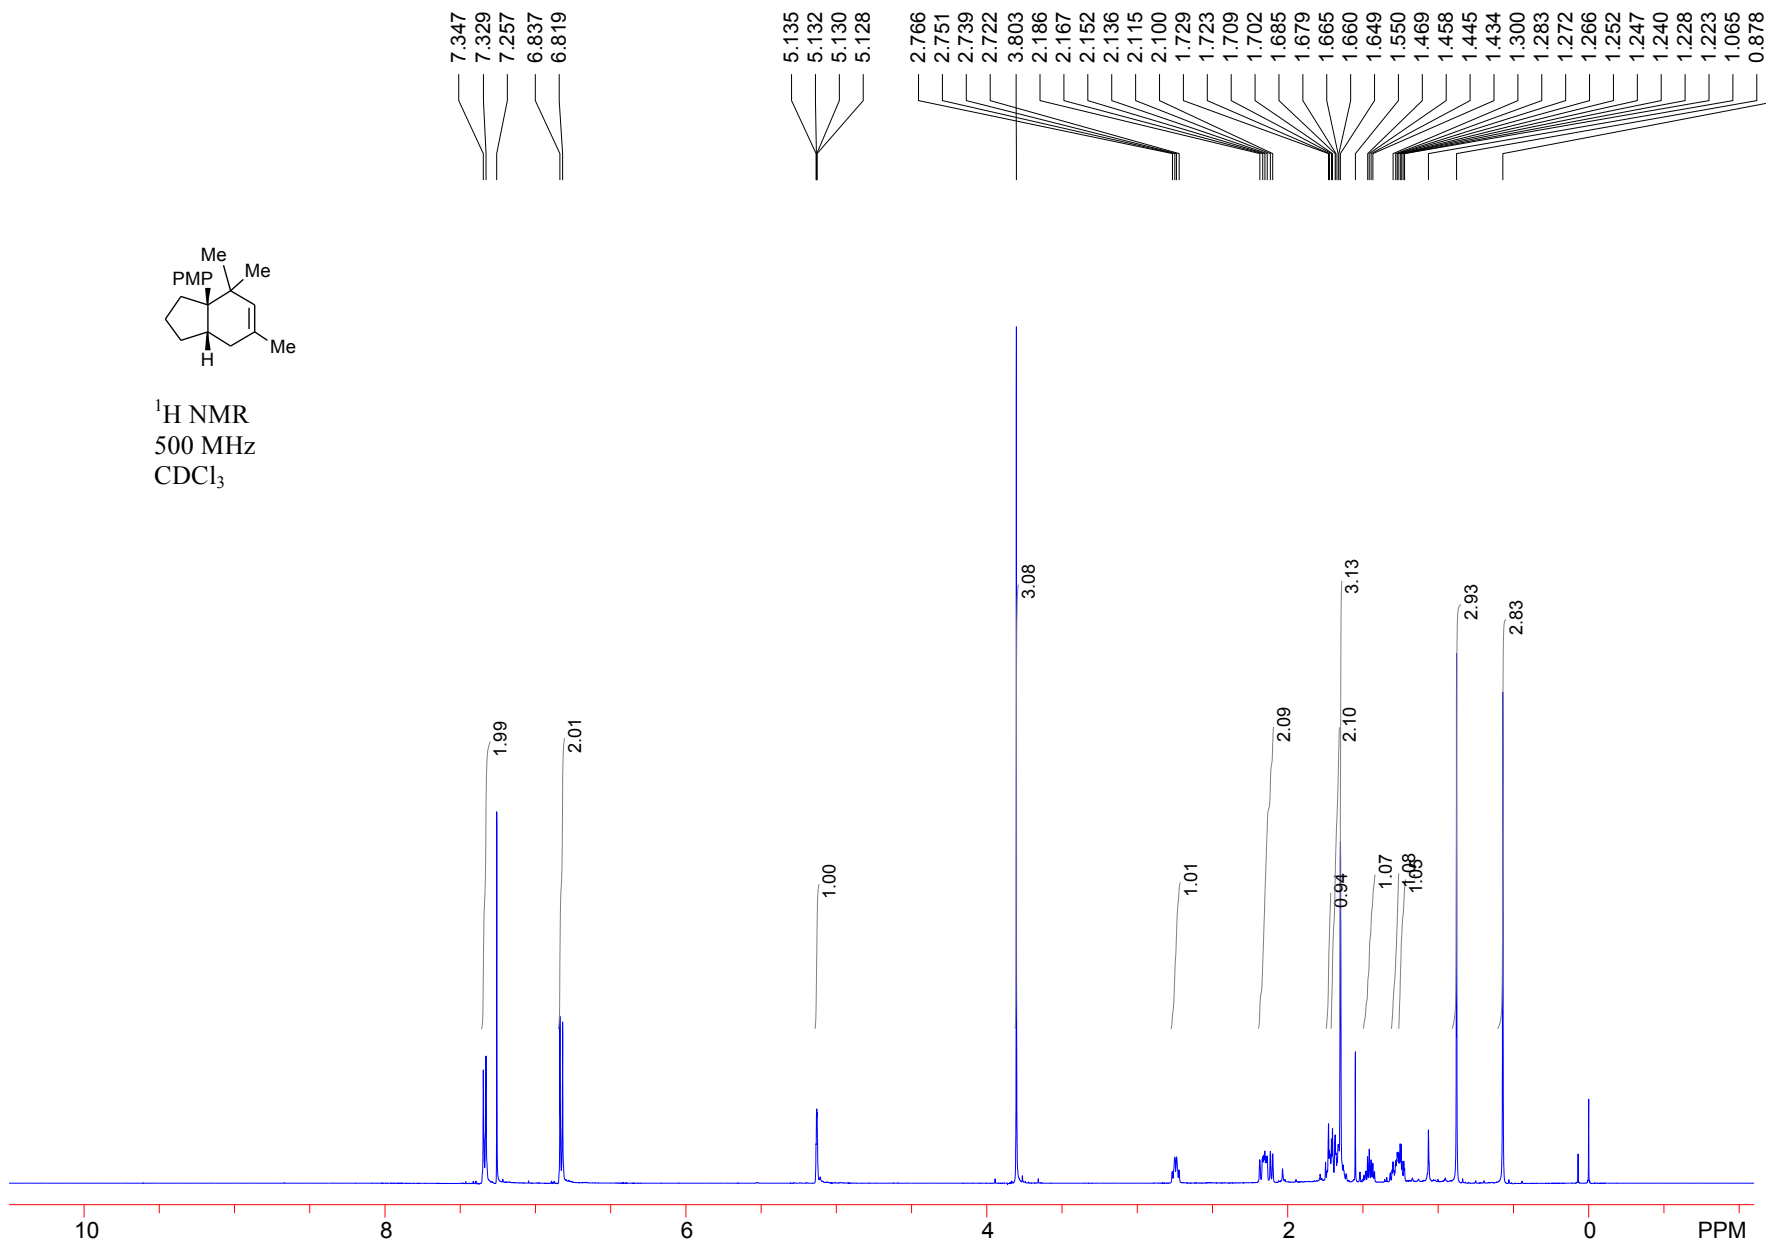

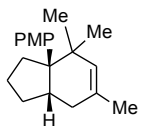

$^{13}\text{C}$  NMR  
125 MHz  
 $\text{CDCl}_3$

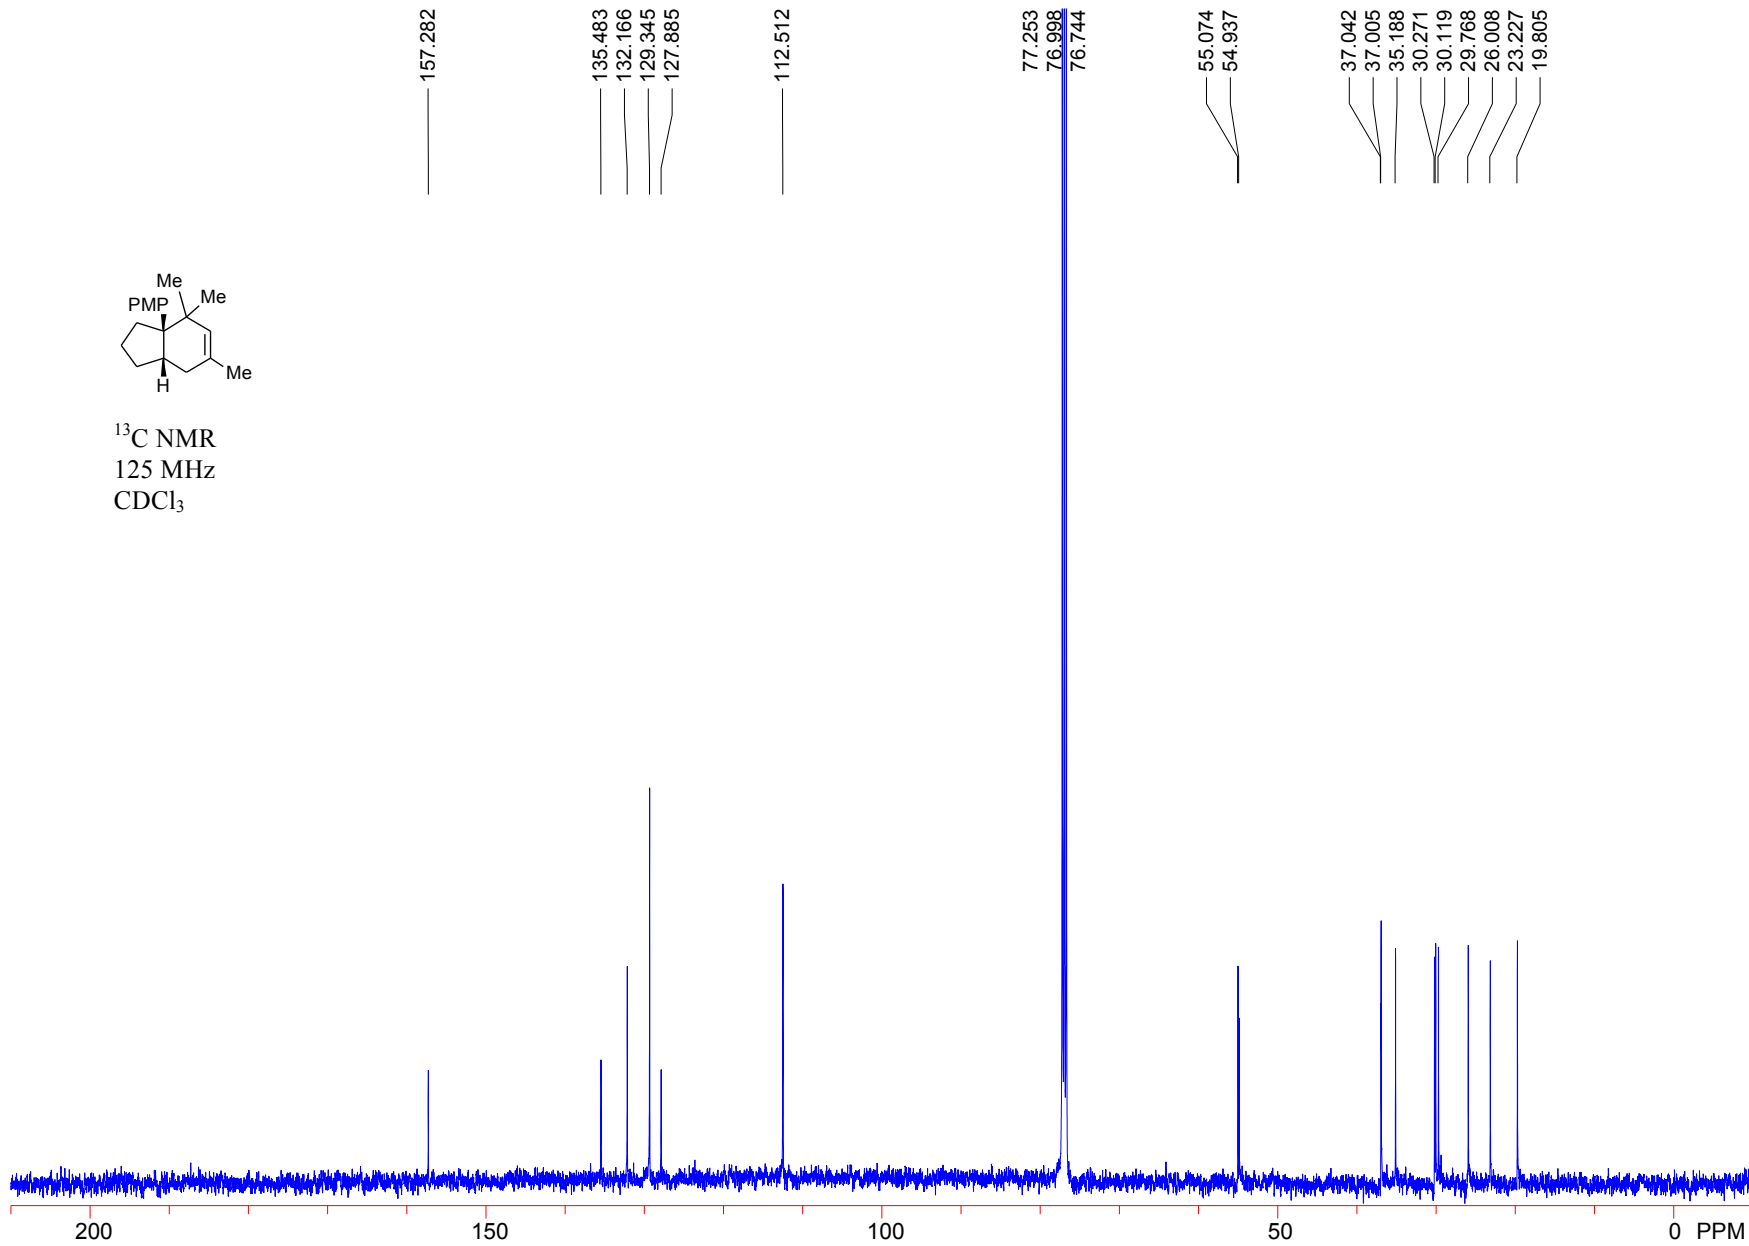

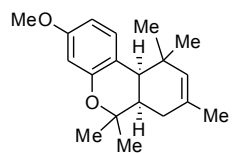

$^1\text{H}$  NMR  
500 MHz  
 $\text{CDCl}_3$

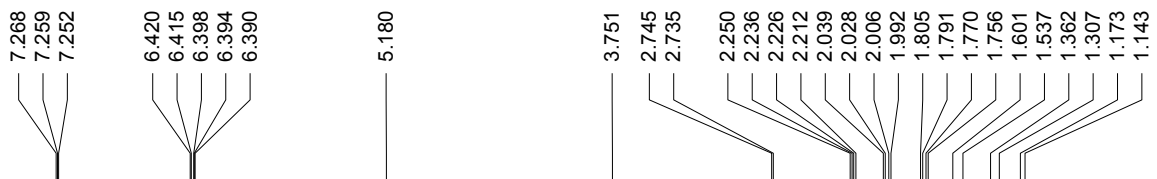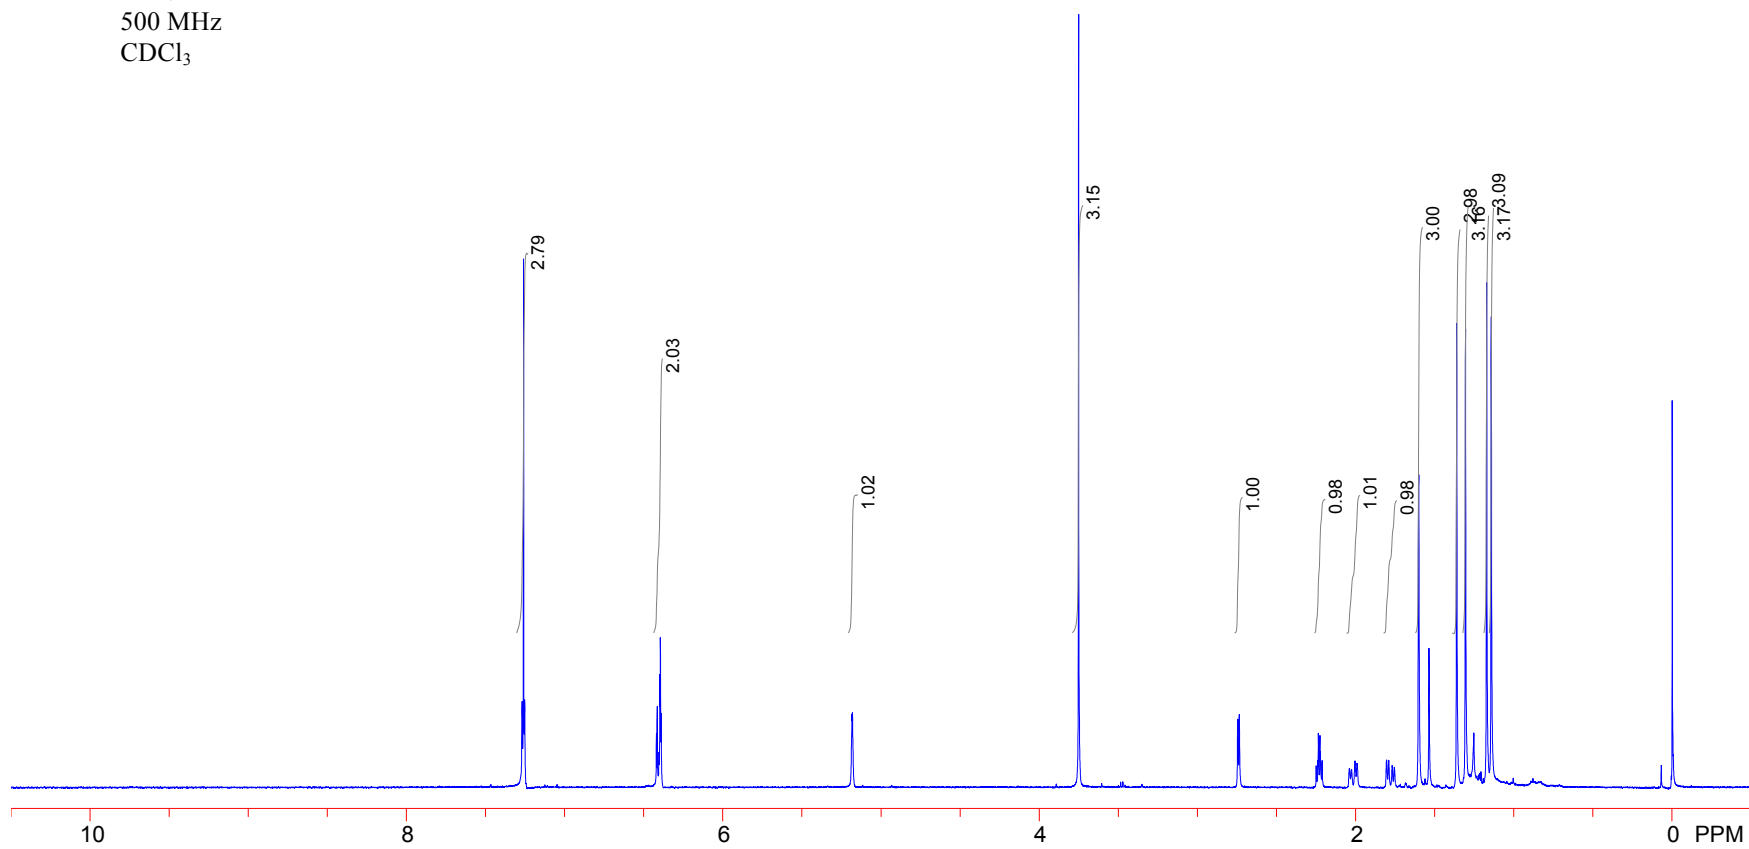

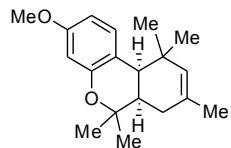

$^{13}\text{C}$  NMR  
125 MHz  
 $\text{CDCl}_3$

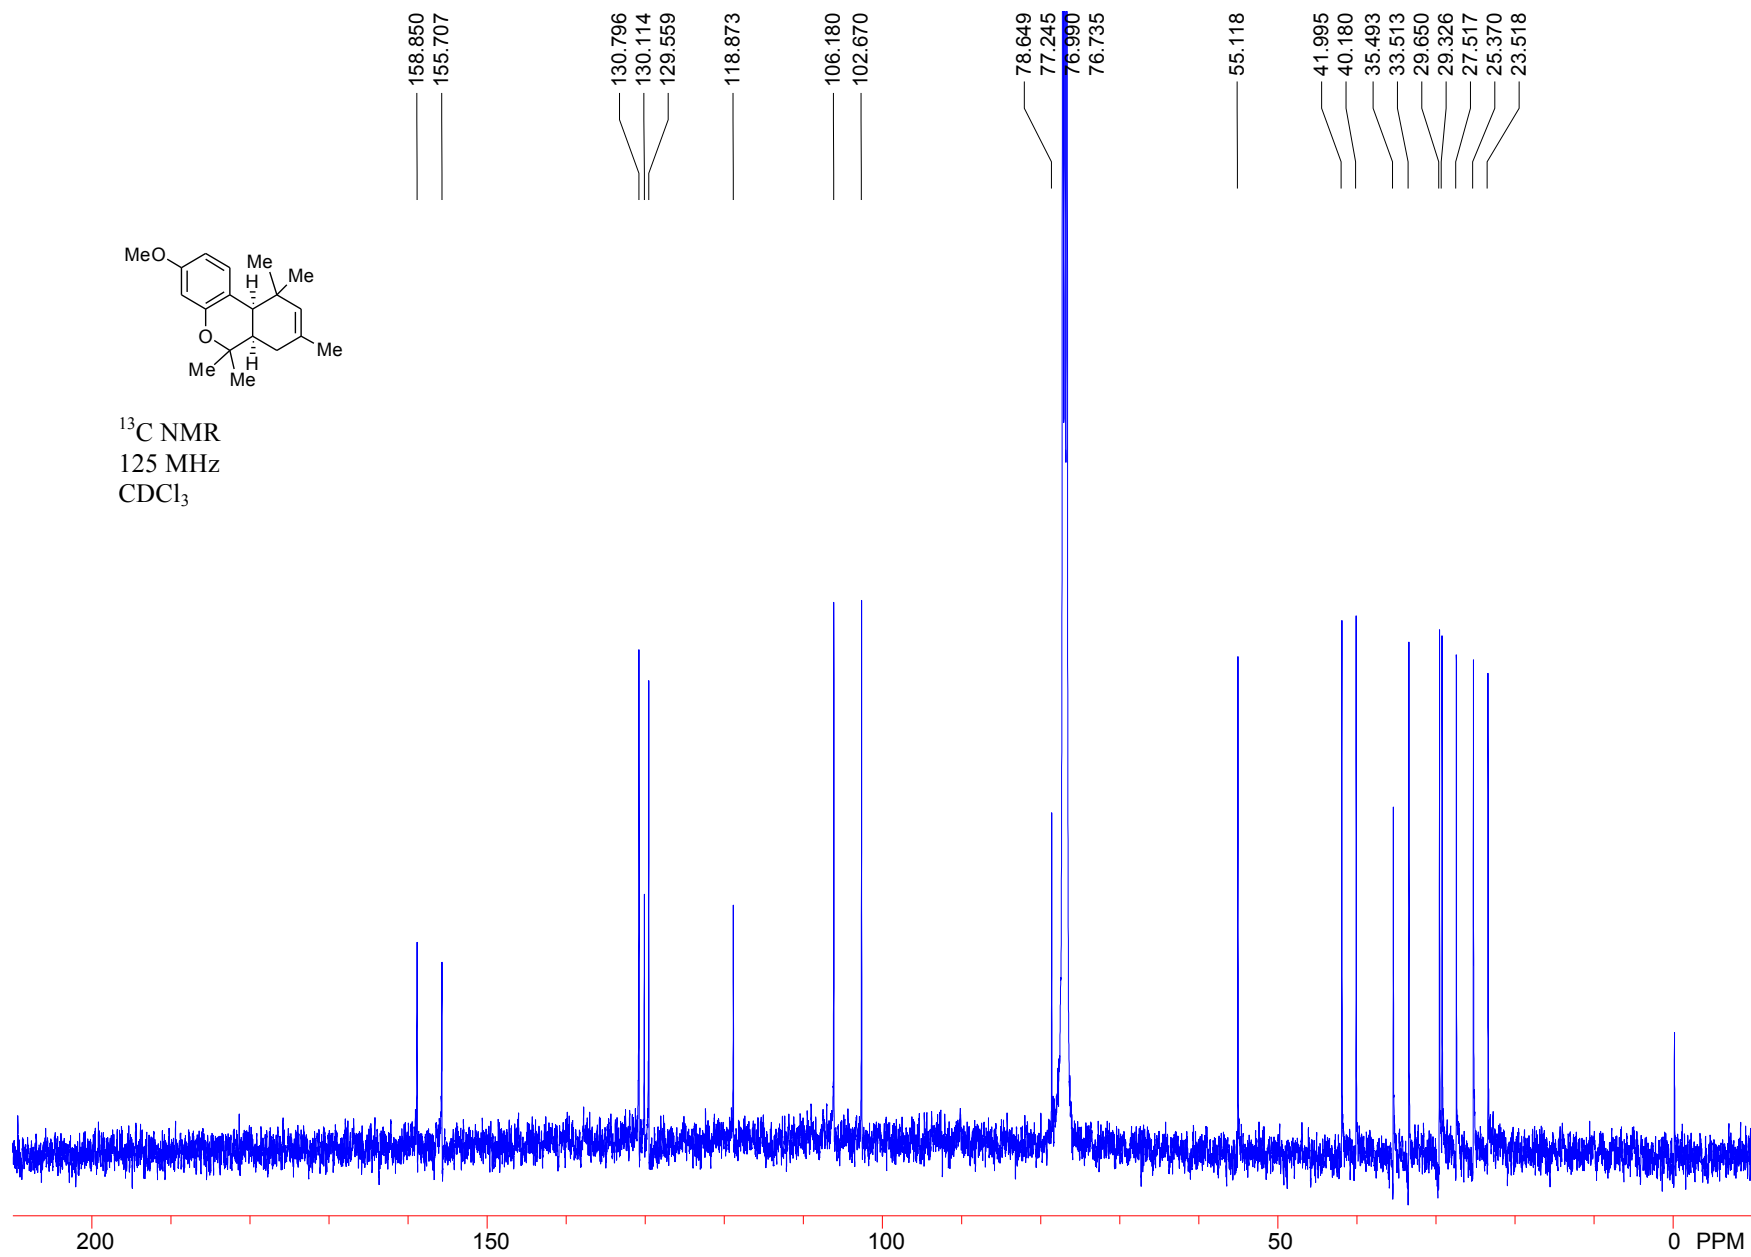

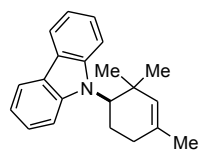

<sup>1</sup>H NMR  
500 MHz  
CDCl<sub>3</sub>

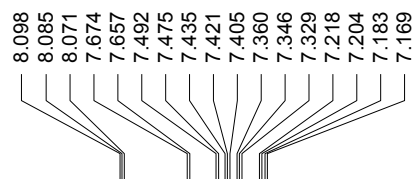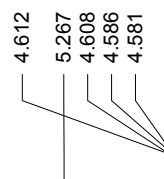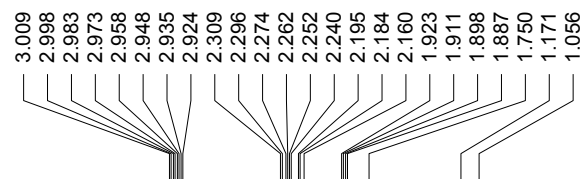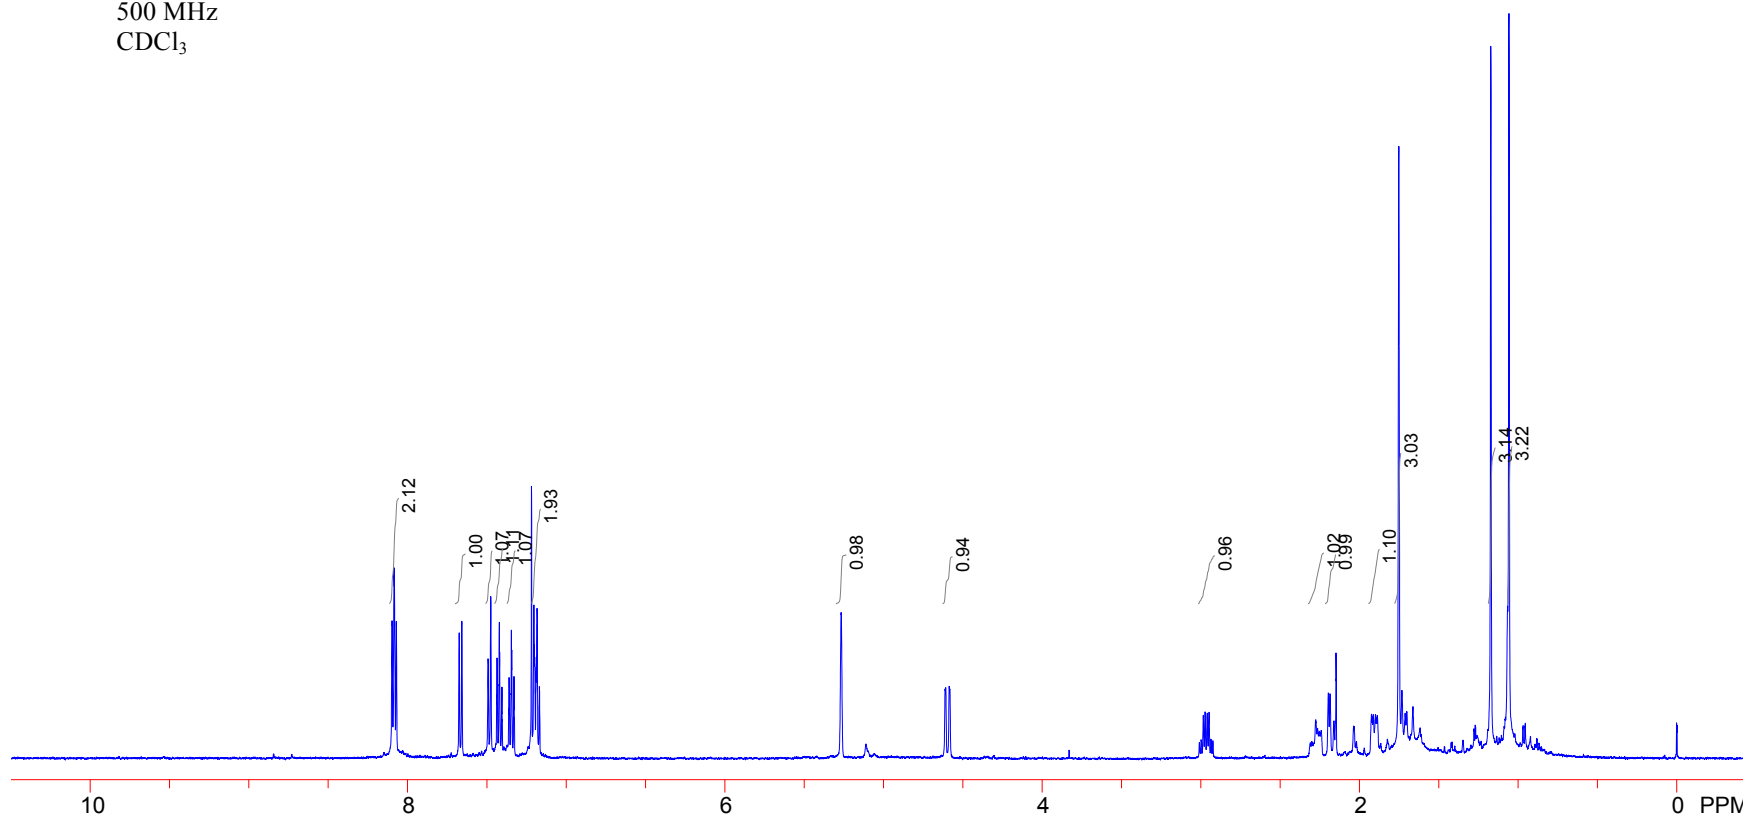

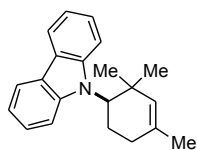

$^{13}\text{C}$  NMR  
125 MHz  
 $\text{CDCl}_3$

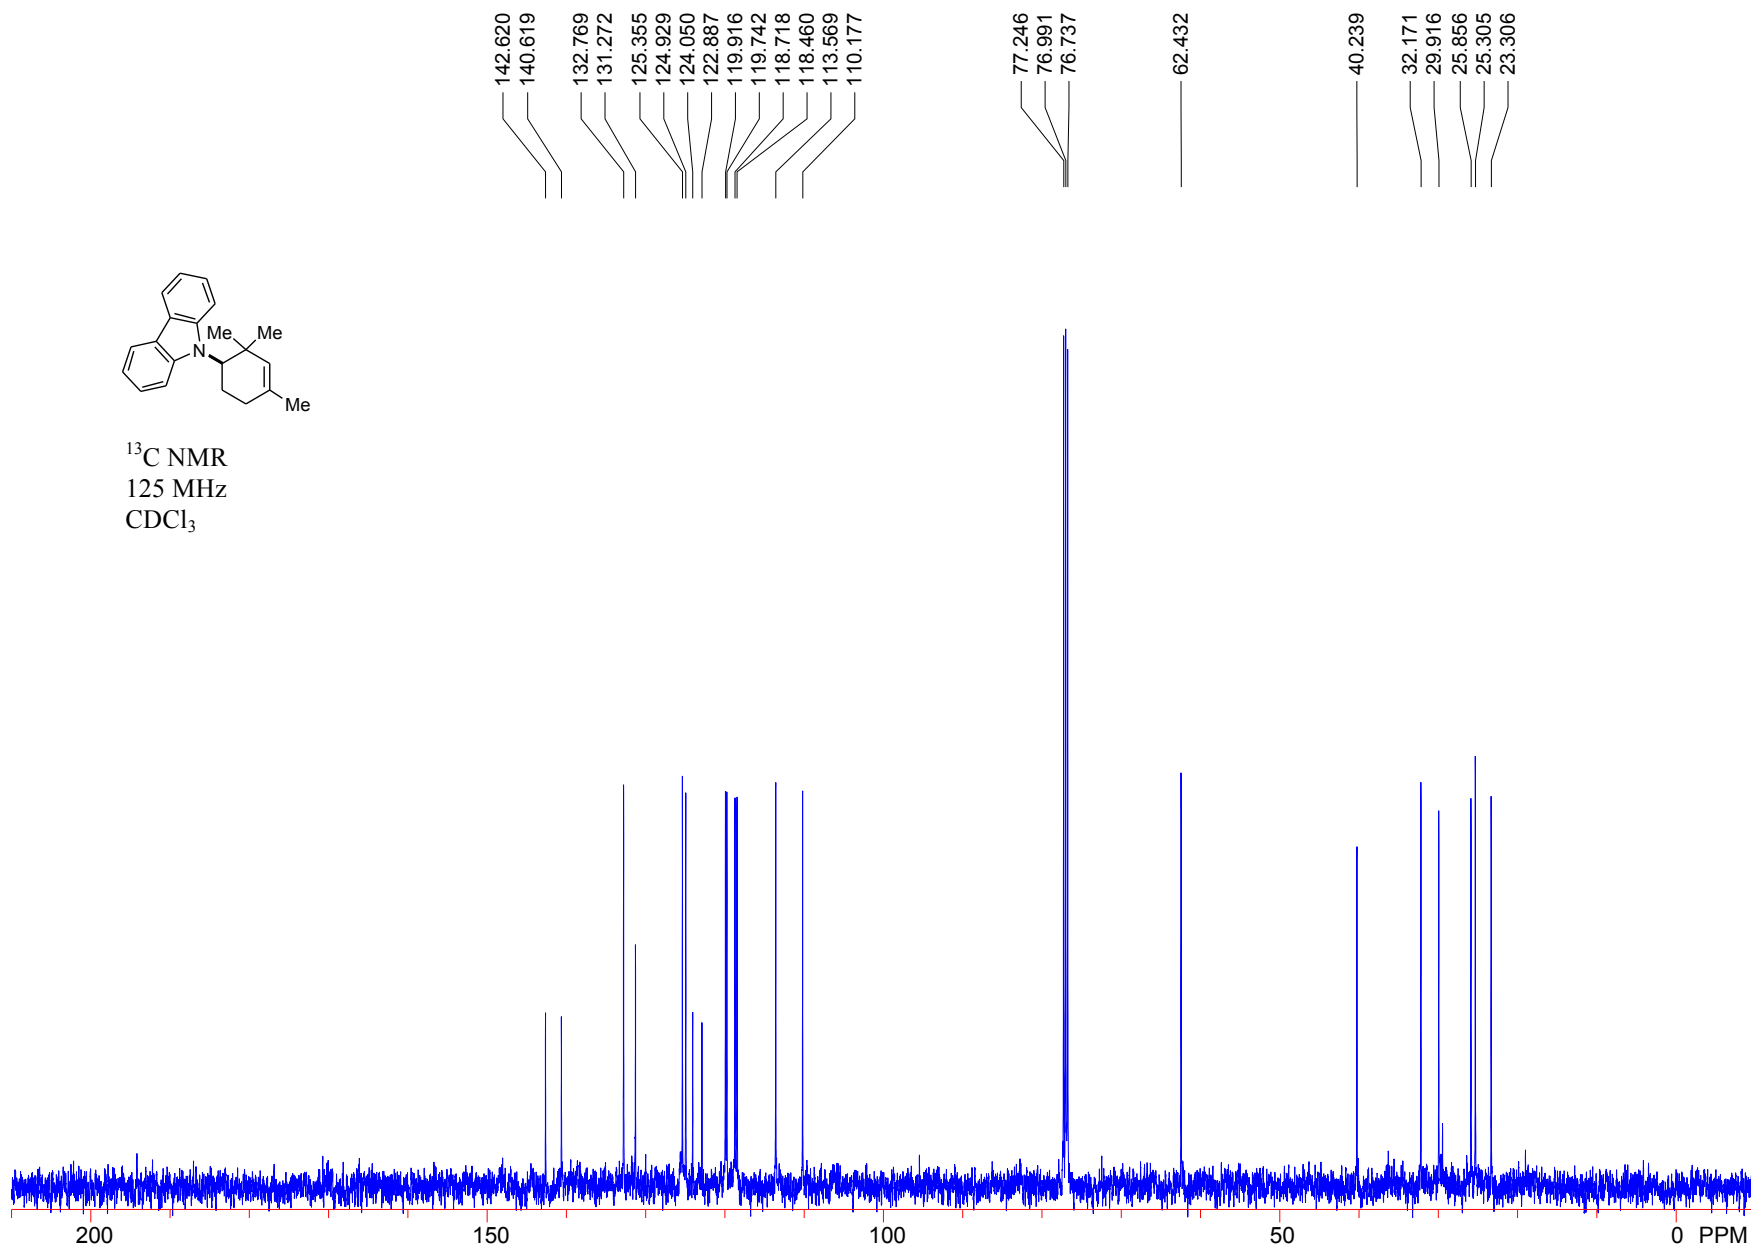

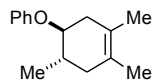

<sup>1</sup>H NMR  
500 MHz  
CDCl<sub>3</sub>

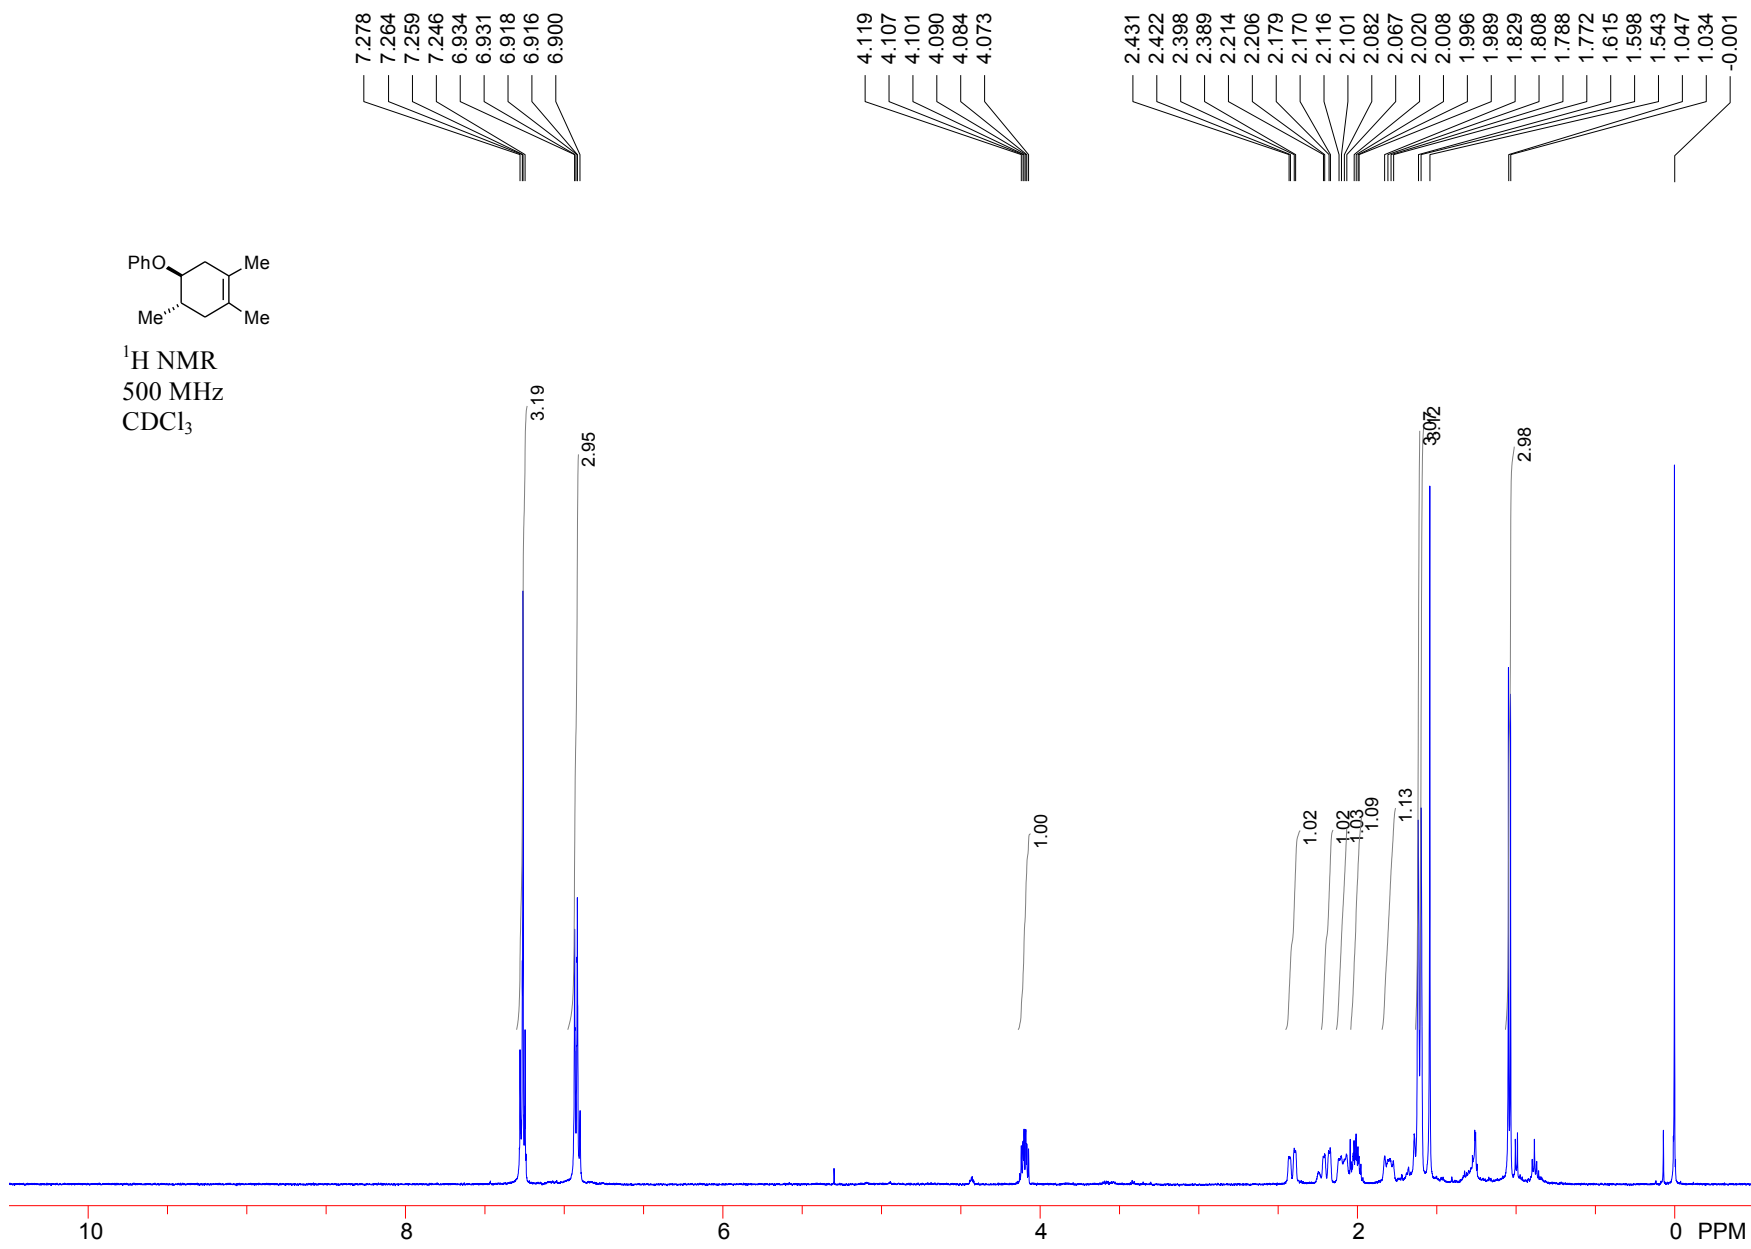

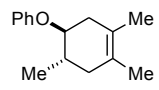

$^{13}\text{C}$  NMR  
125 MHz  
 $\text{CDCl}_3$

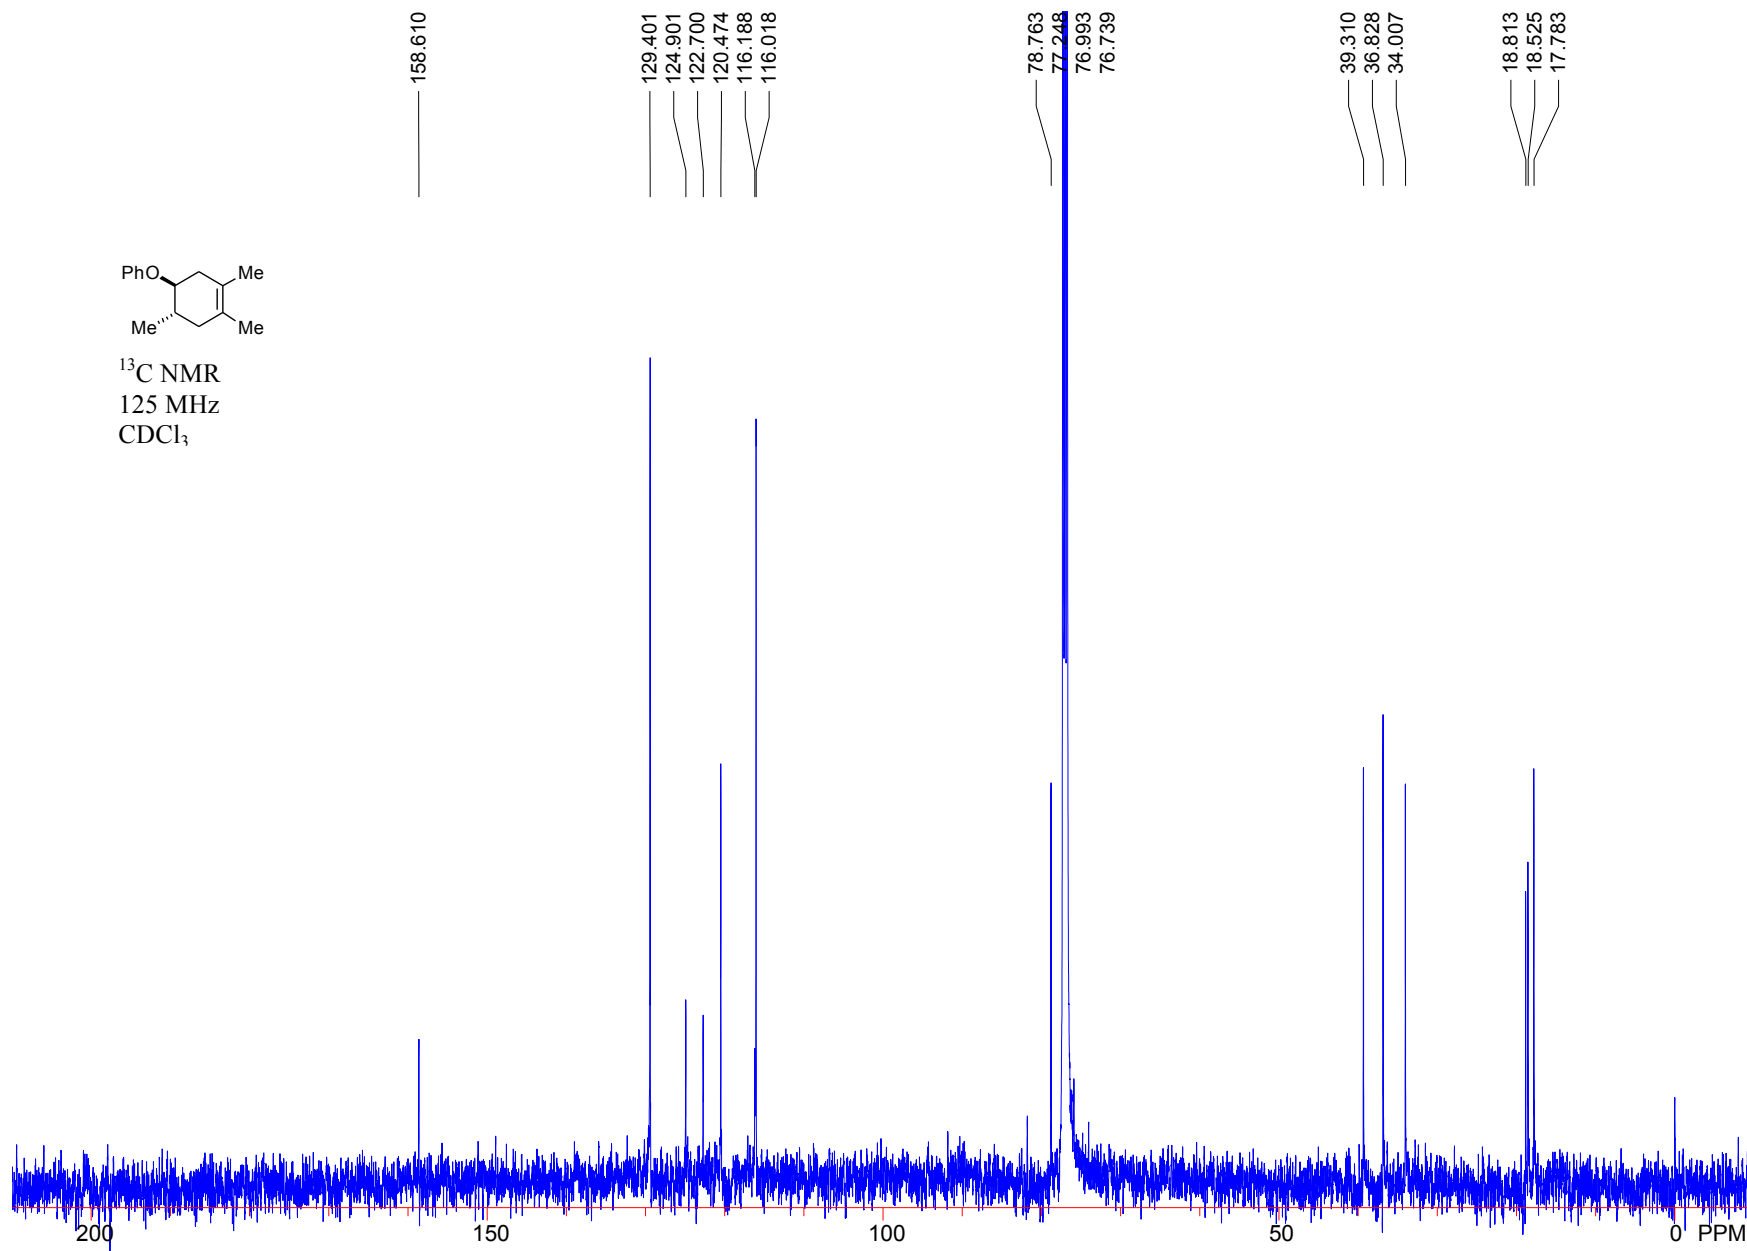



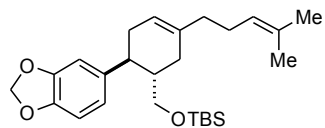

$^1\text{H NMR}$   
500 MHz  
 $\text{CDCl}_3$

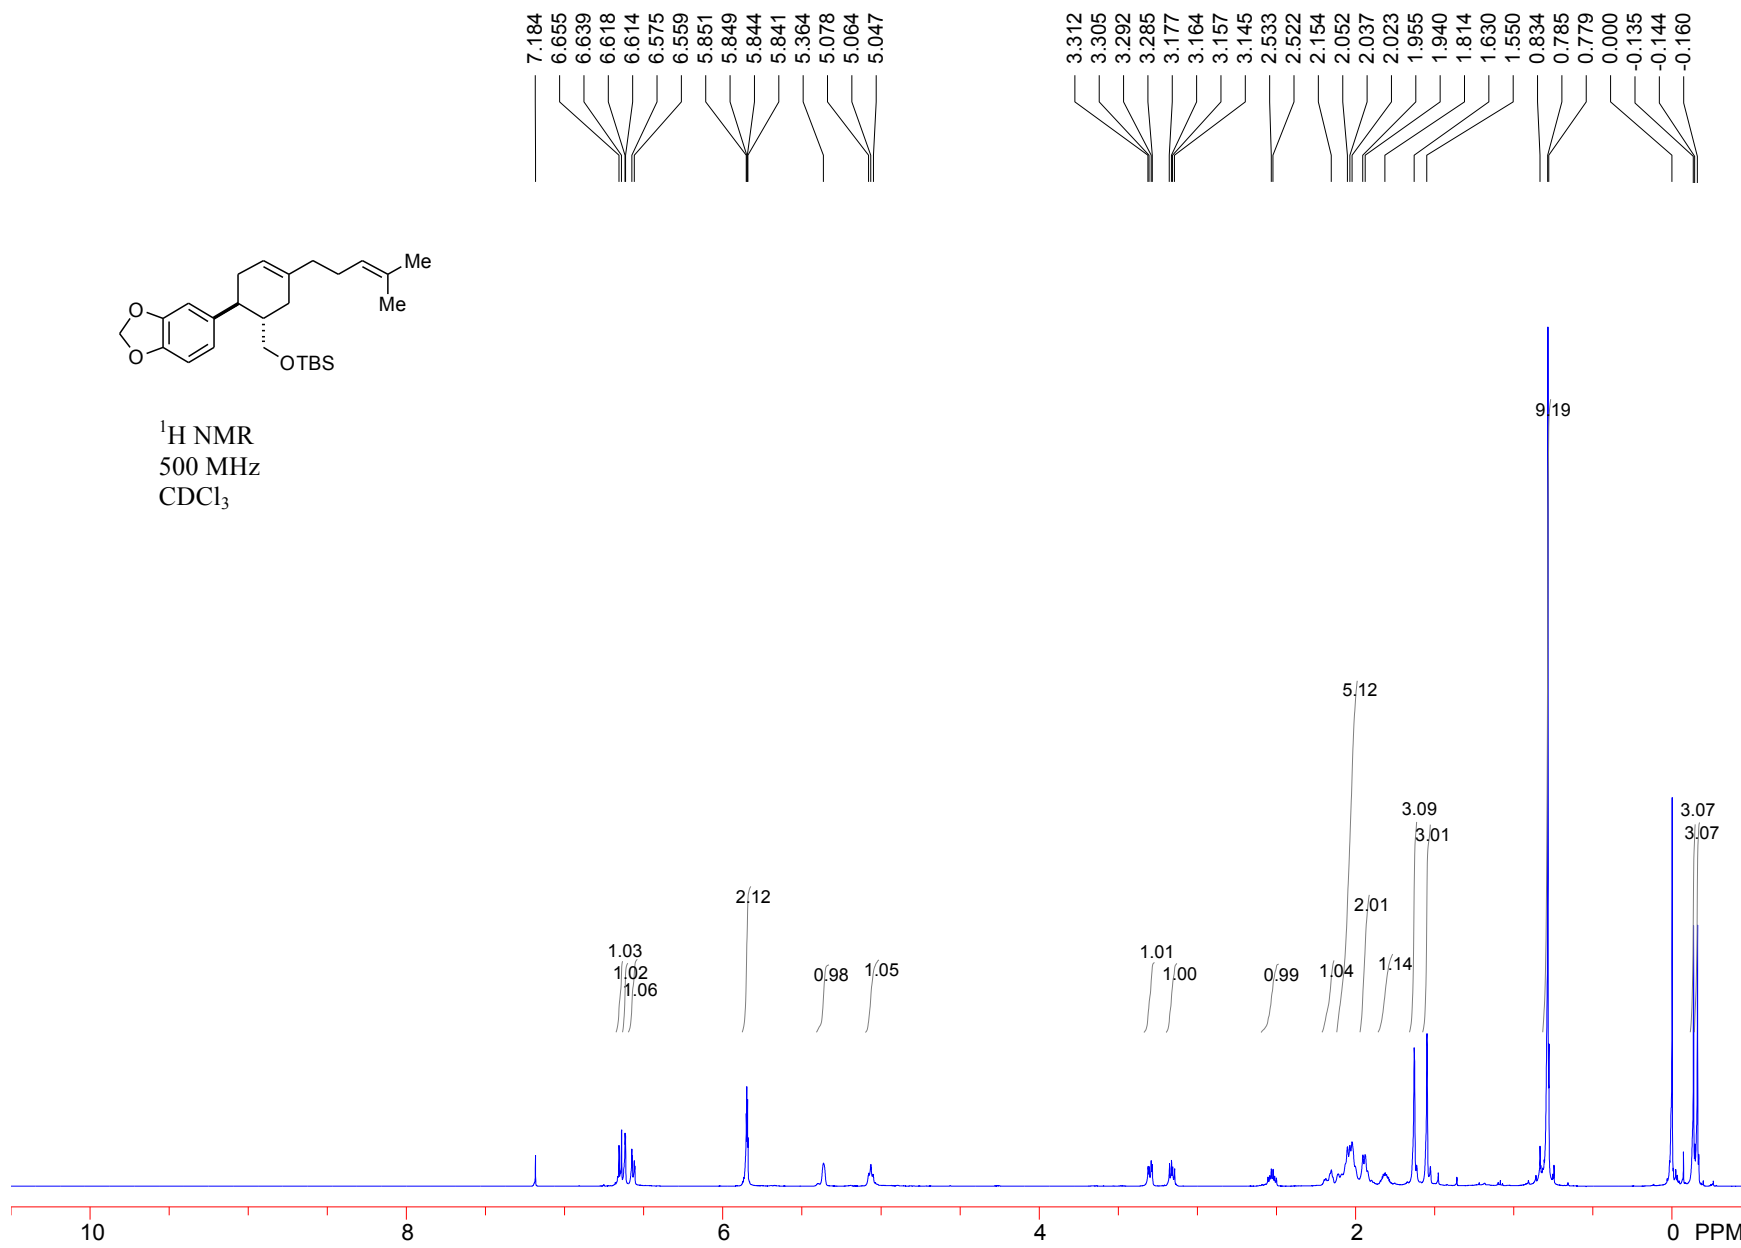

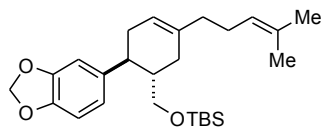

$^{13}\text{C}$  NMR  
125 MHz  
 $\text{CDCl}_3$

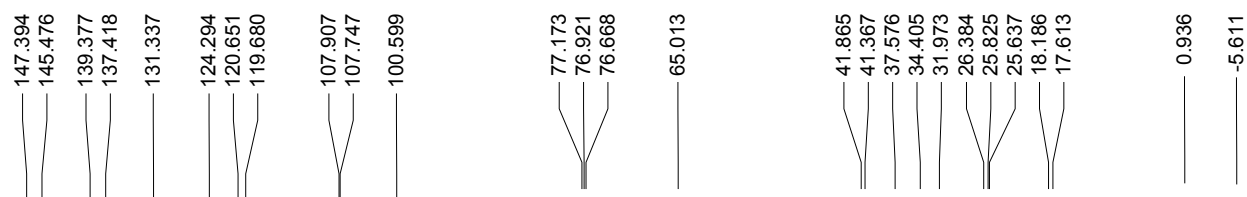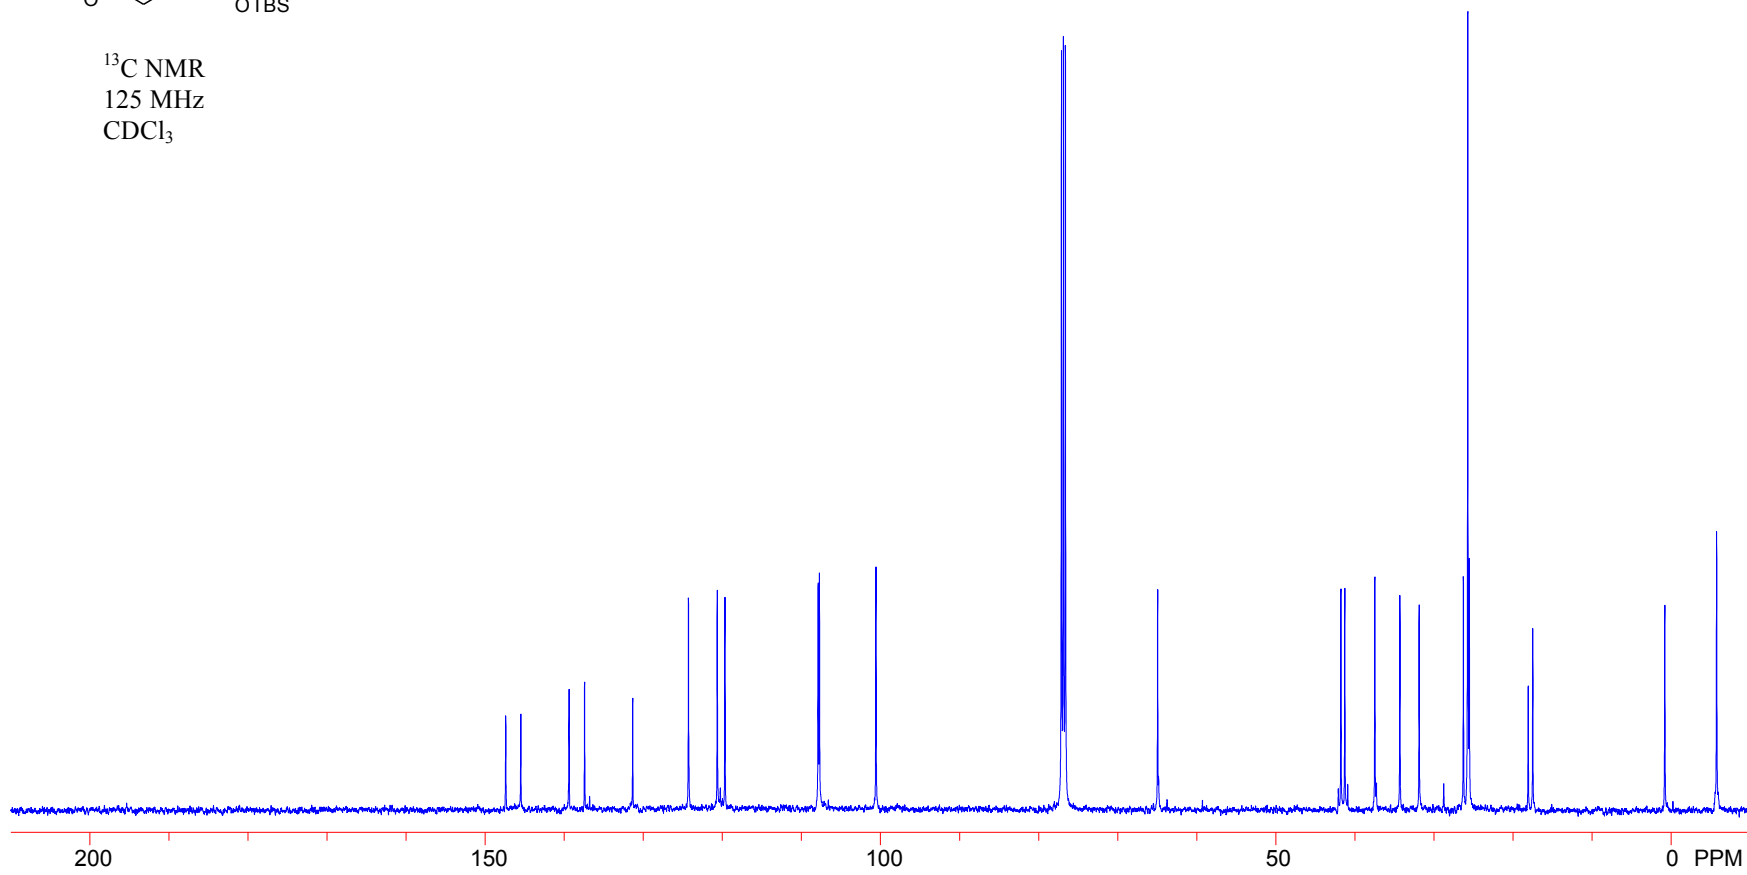

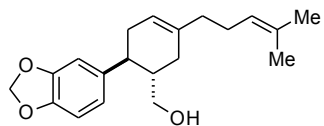

$^1\text{H NMR}$   
500 MHz  
 $\text{CDCl}_3$

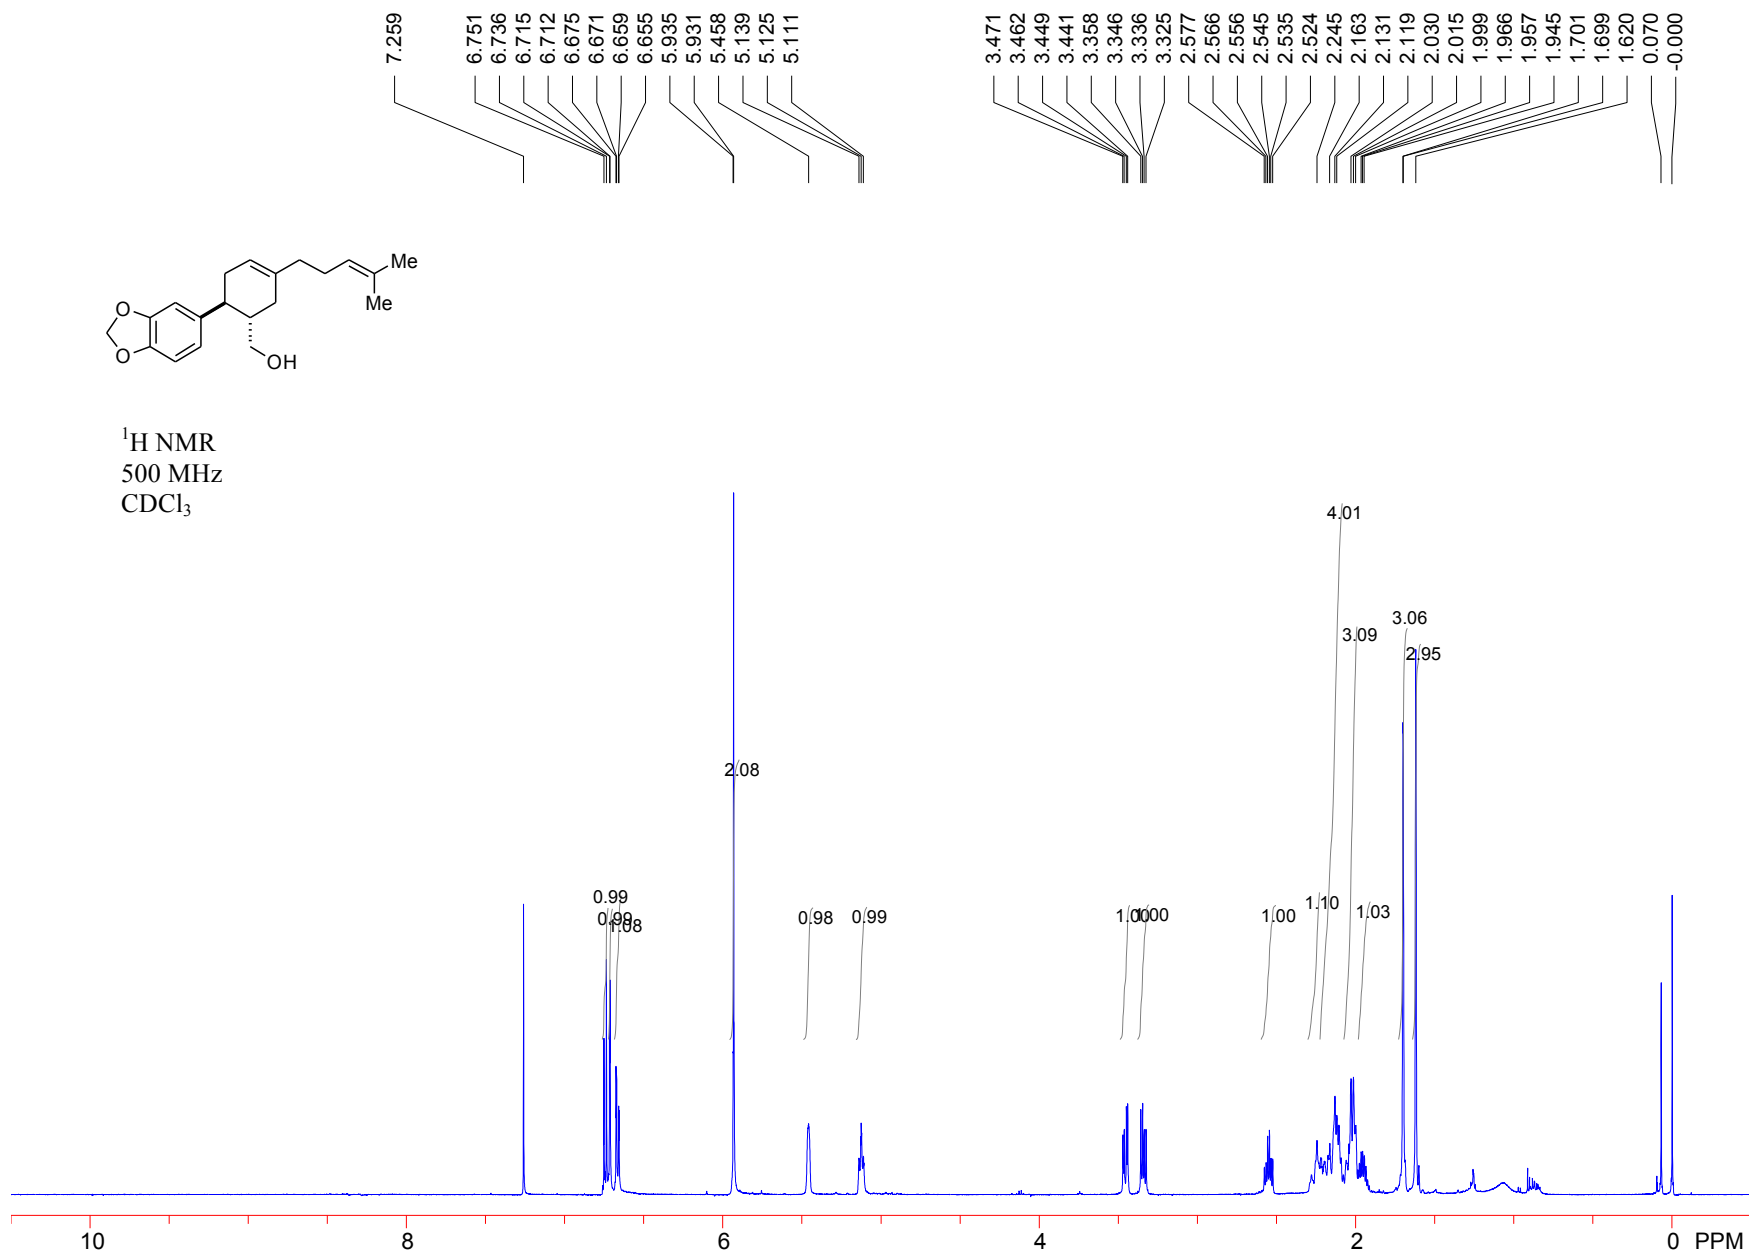

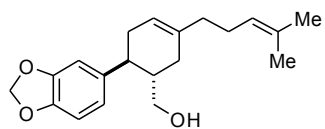

$^{13}\text{C}$  NMR  
125 MHz  
 $\text{CDCl}_3$

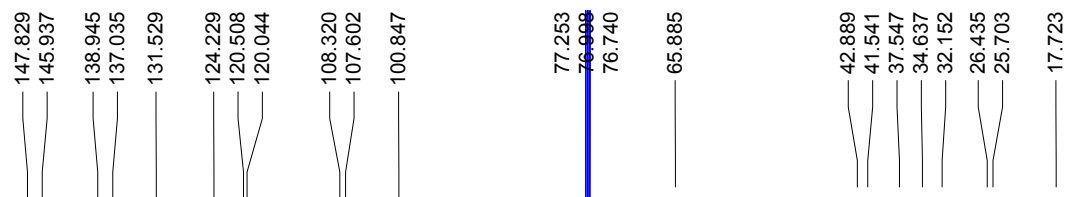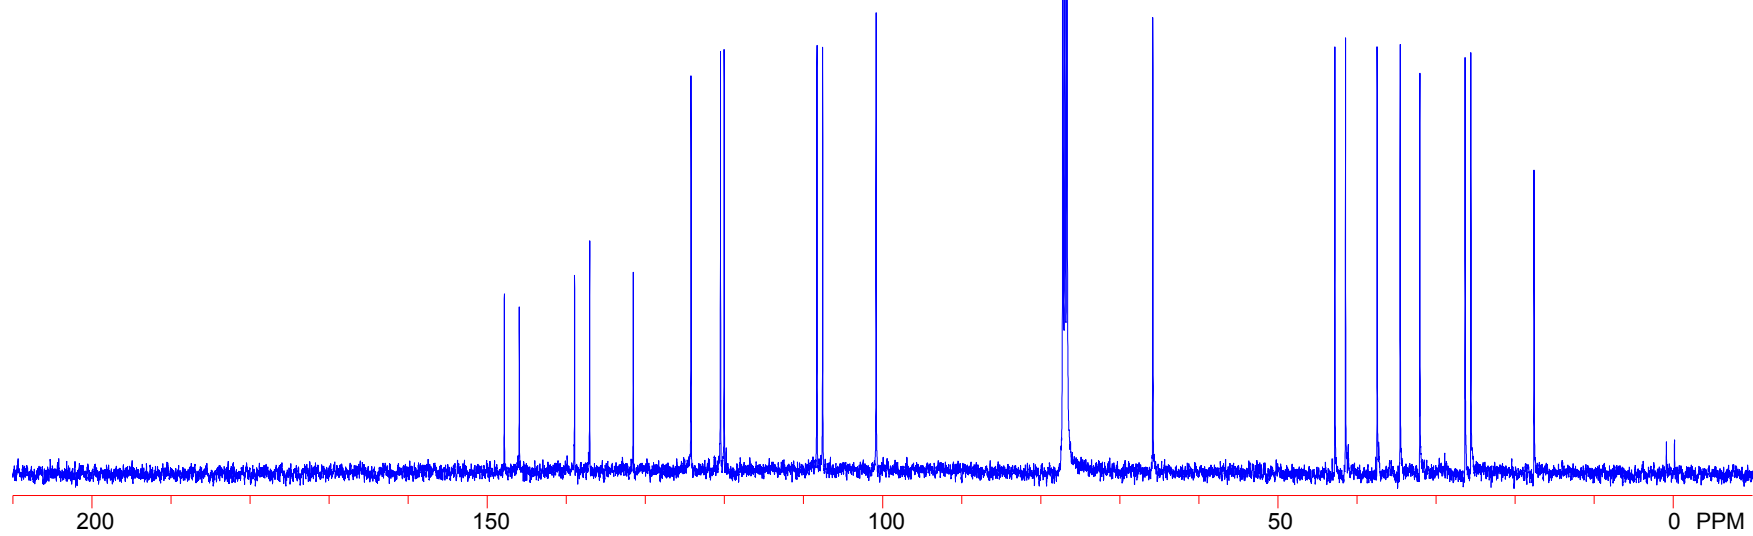

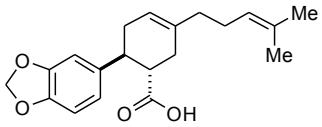

$^1\text{H NMR}$   
500 MHz  
 $\text{CDCl}_3$

7.259  
6.715  
6.705  
6.702  
6.700  
6.669  
6.666  
6.653  
6.650  
5.925  
5.922  
5.920  
5.916  
5.473  
5.468  
5.116  
5.104  
5.102  
5.099  
5.088

2.942  
2.931  
2.921  
2.911  
2.900  
2.889  
2.822  
2.811  
2.801  
2.790  
2.779  
2.769  
2.332  
2.293  
2.282  
2.128  
2.112  
2.103  
2.091  
2.024  
2.010  
1.995  
1.697  
1.613  
0.068  
-0.000

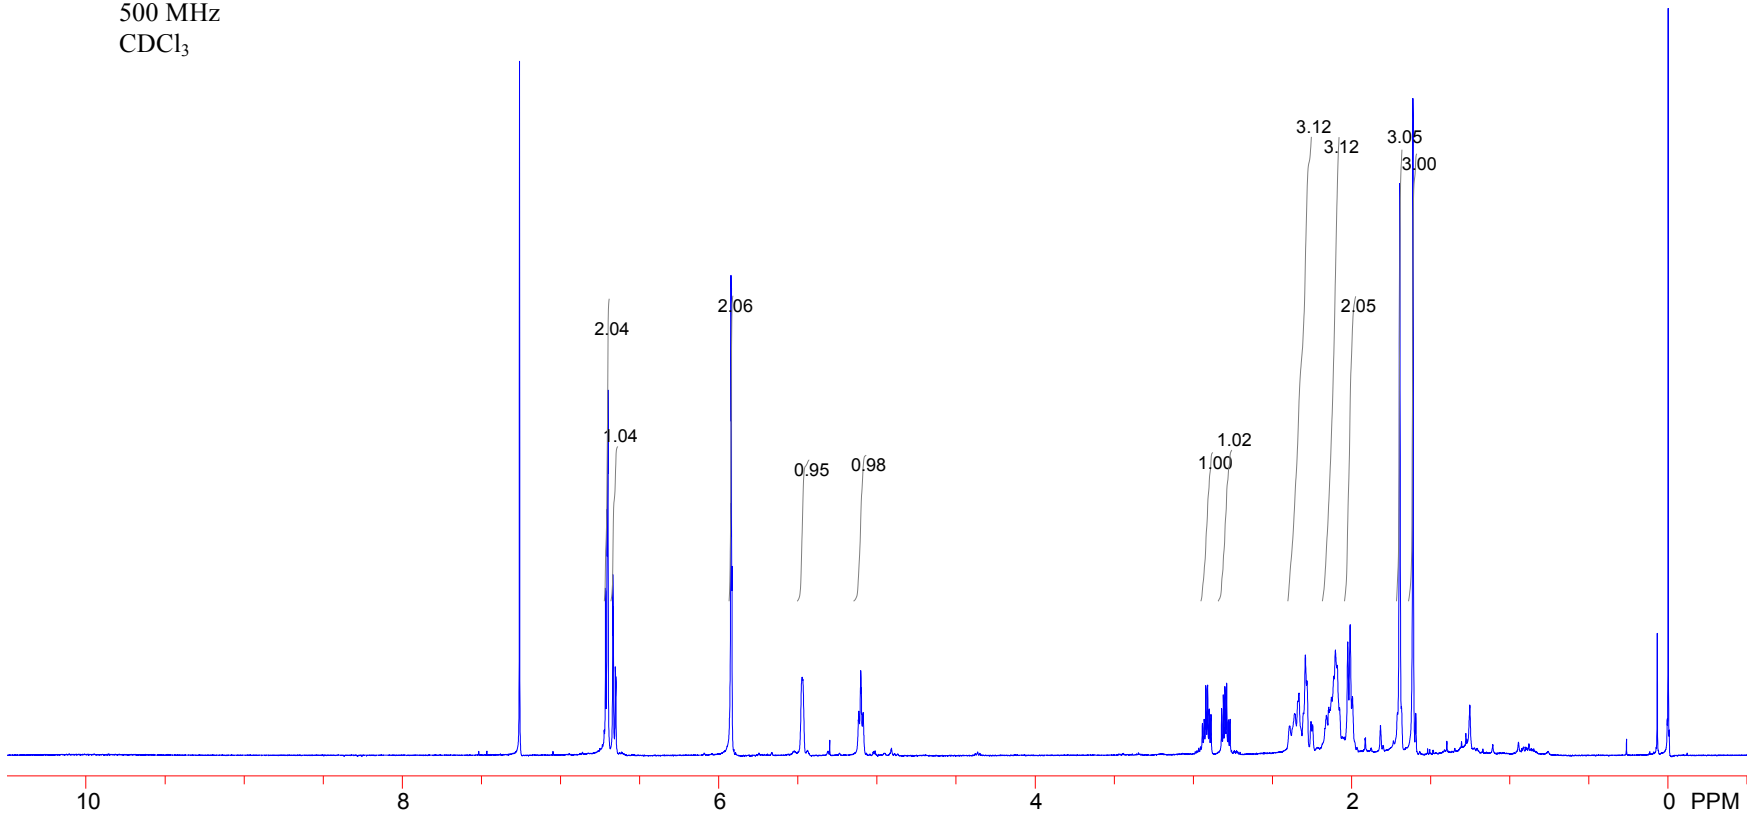

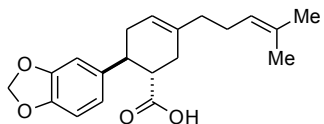

$^{13}\text{C}$  NMR  
125 MHz  
 $\text{CDCl}_3$

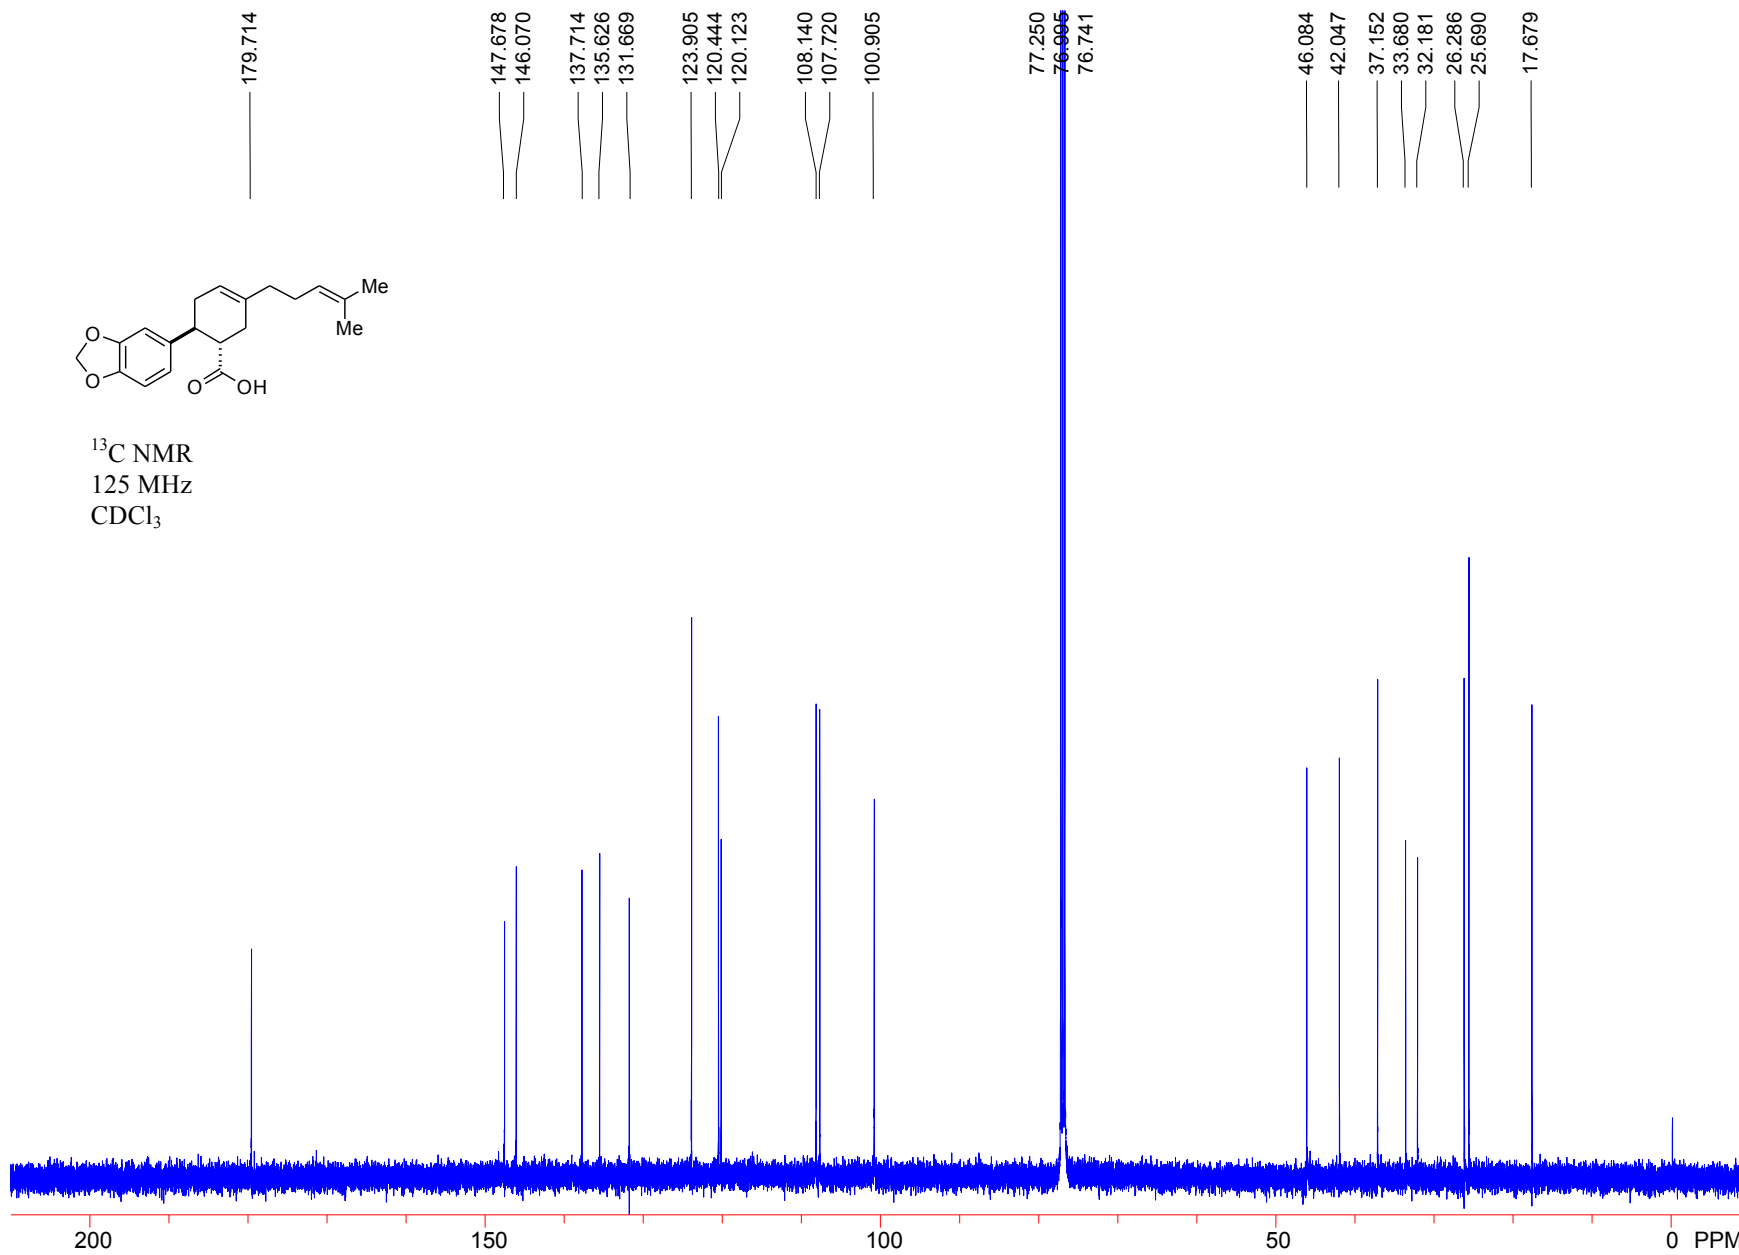

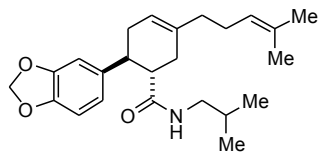

<sup>1</sup>H NMR  
500 MHz  
CDCl<sub>3</sub>

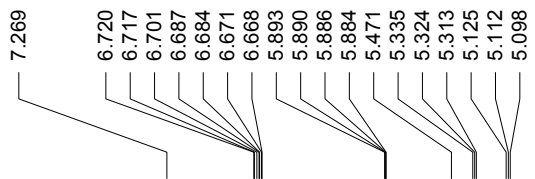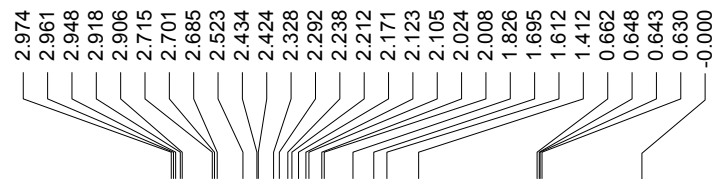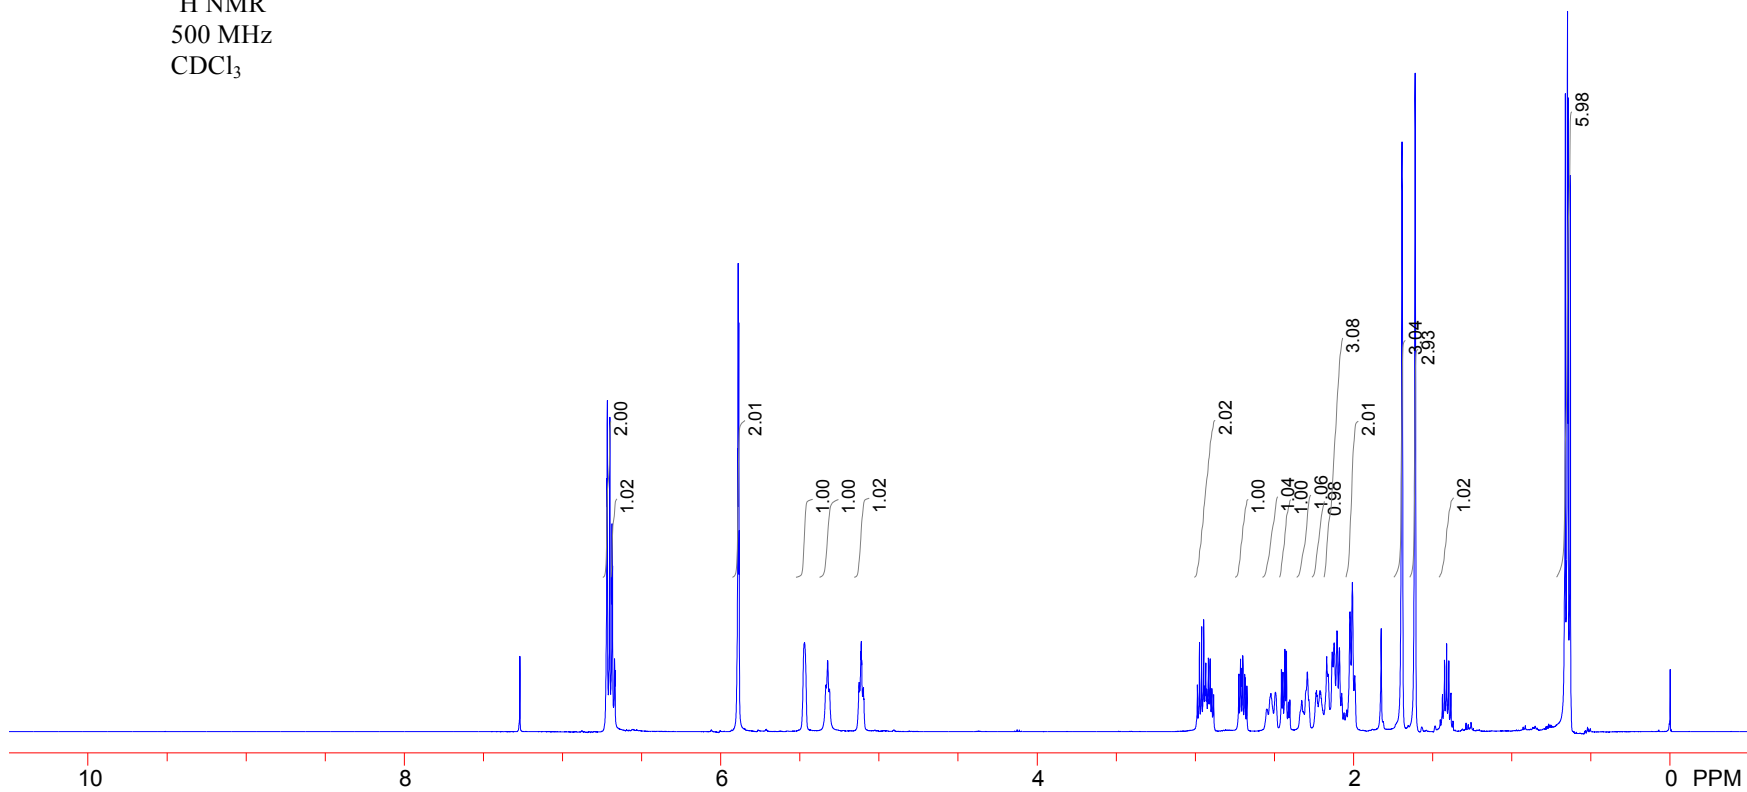

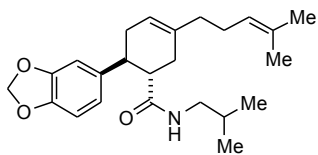

<sup>13</sup>C NMR  
125 MHz  
CDCl<sub>3</sub>

- 174.396
- 147.633
- 146.034
- 138.312
- 136.337
- 131.654
- 124.068
- 120.771
- 119.752
- 108.275
- 107.661
- 100.762
- 77.284
- 77.029
- 76.771
- 49.267
- 46.596
- 42.747
- 37.366
- 33.653
- 32.724
- 28.303
- 26.340
- 25.675
- 19.756
- 17.697

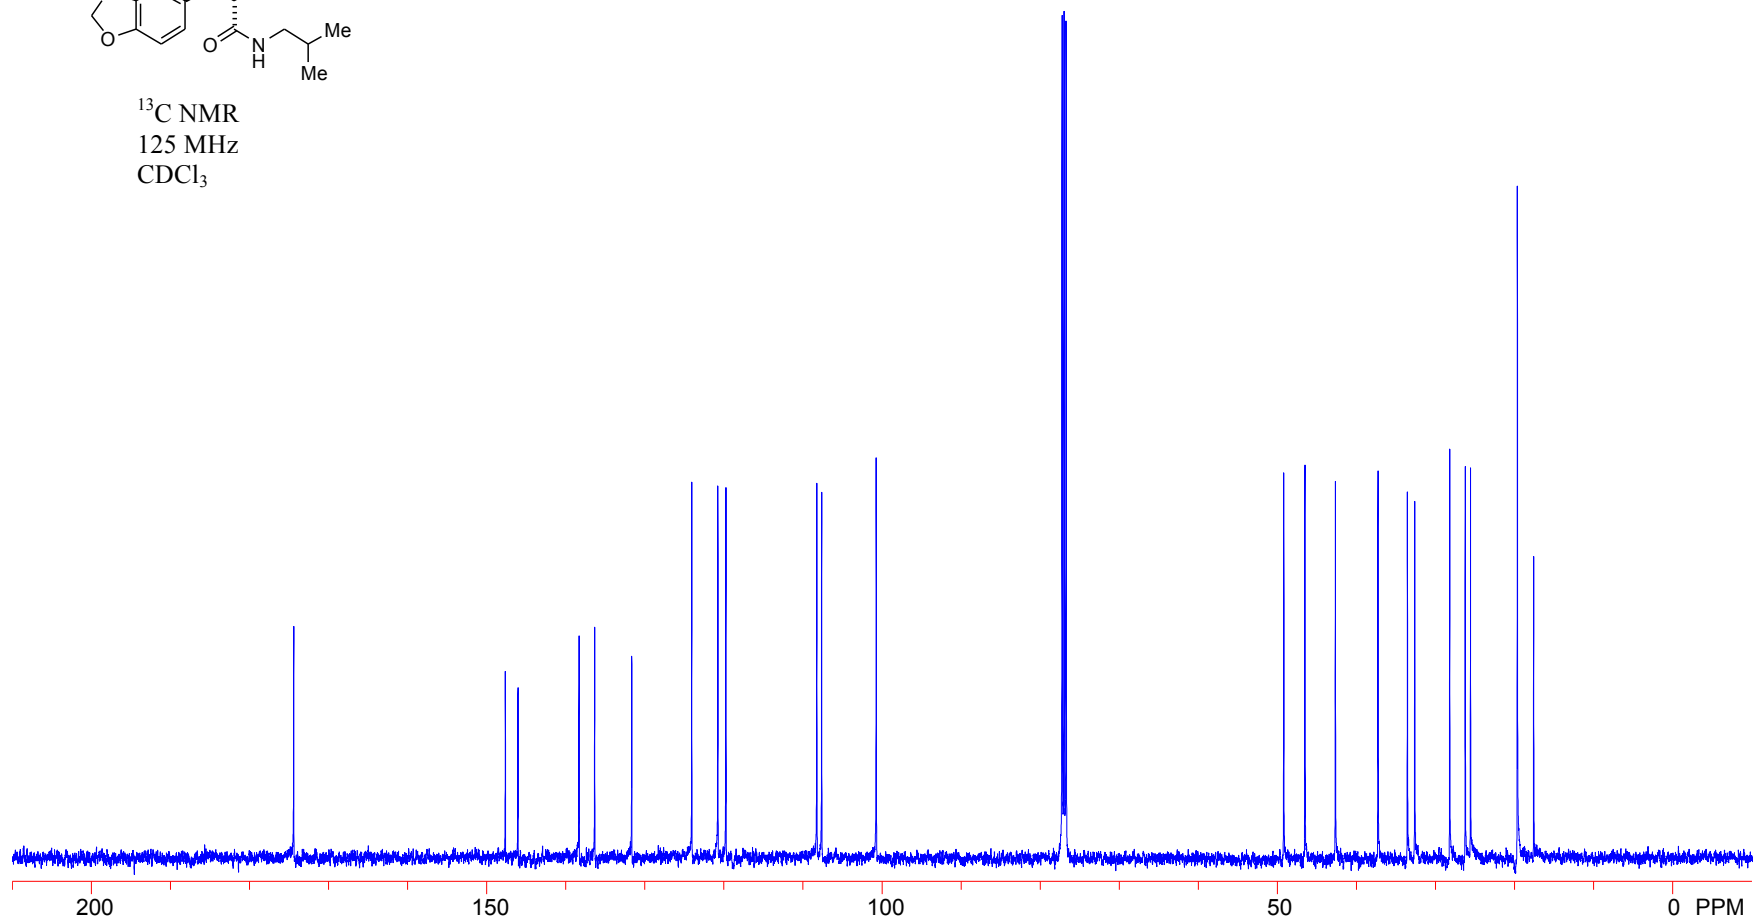



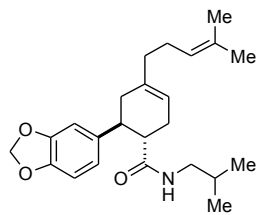

$^1\text{H}$  NMR  
600 MHz  
 $\text{C}_6\text{D}_6$

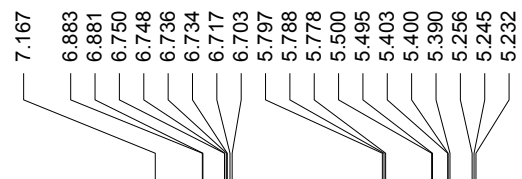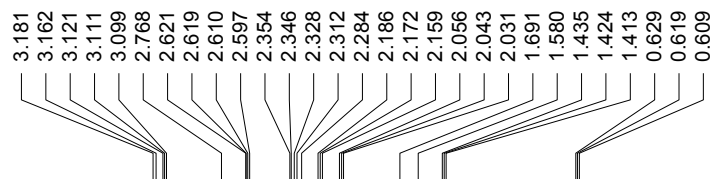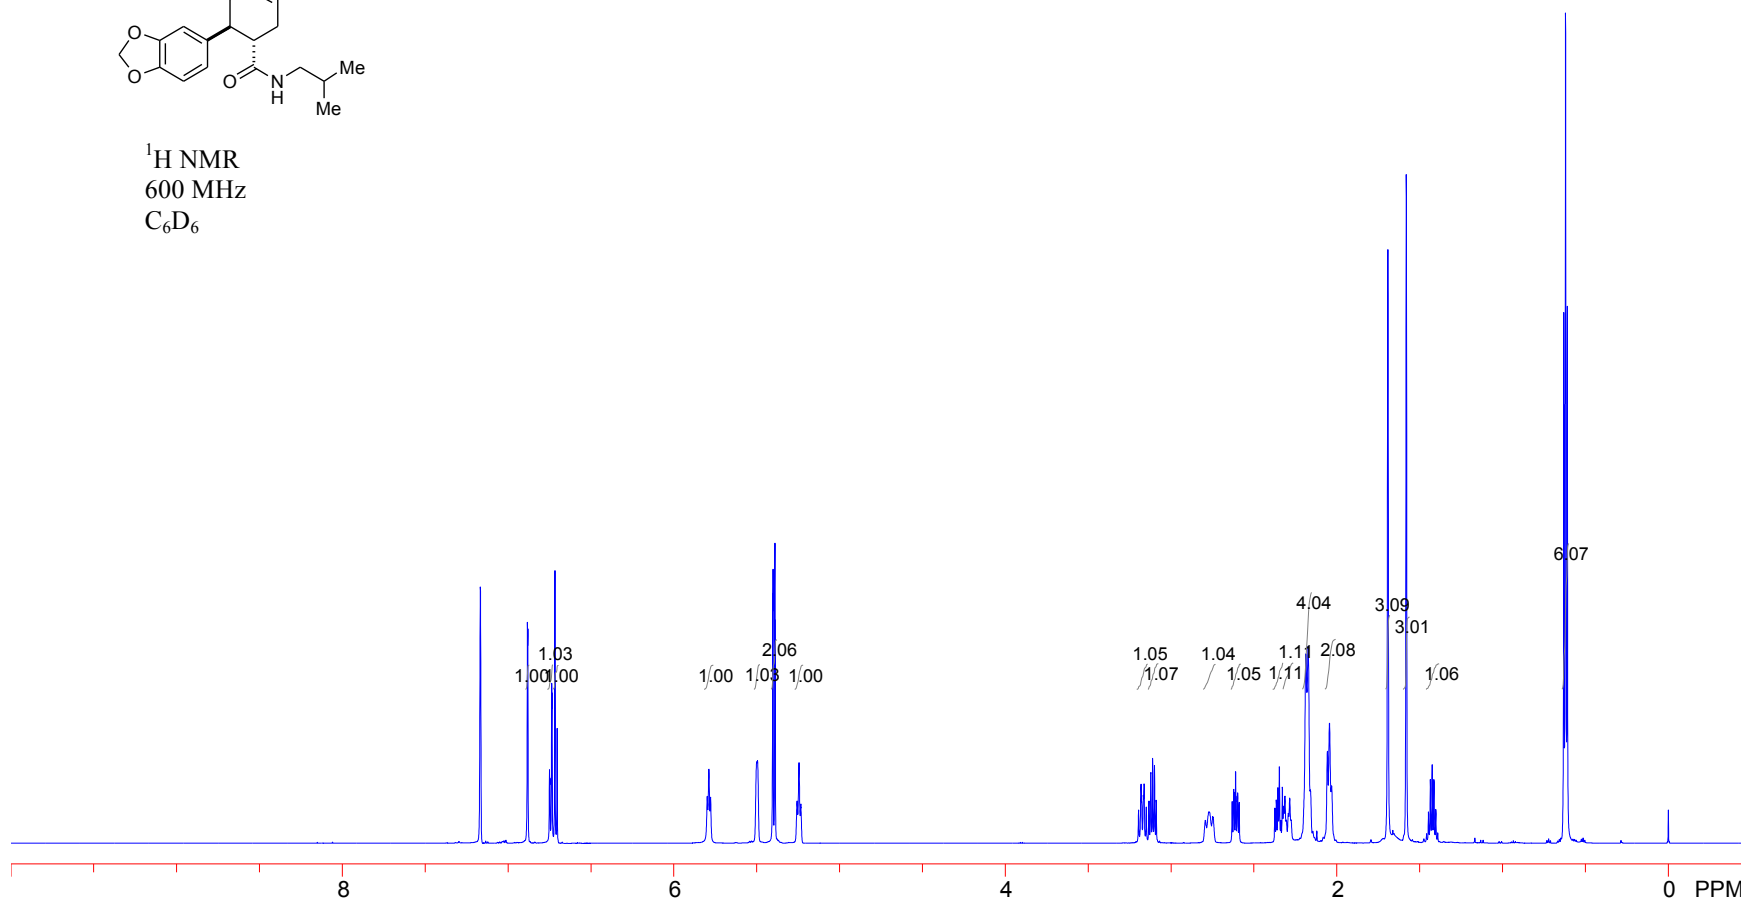

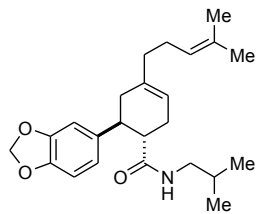

$^{13}\text{C}$  NMR  
150 MHz  
 $\text{C}_6\text{D}_6$

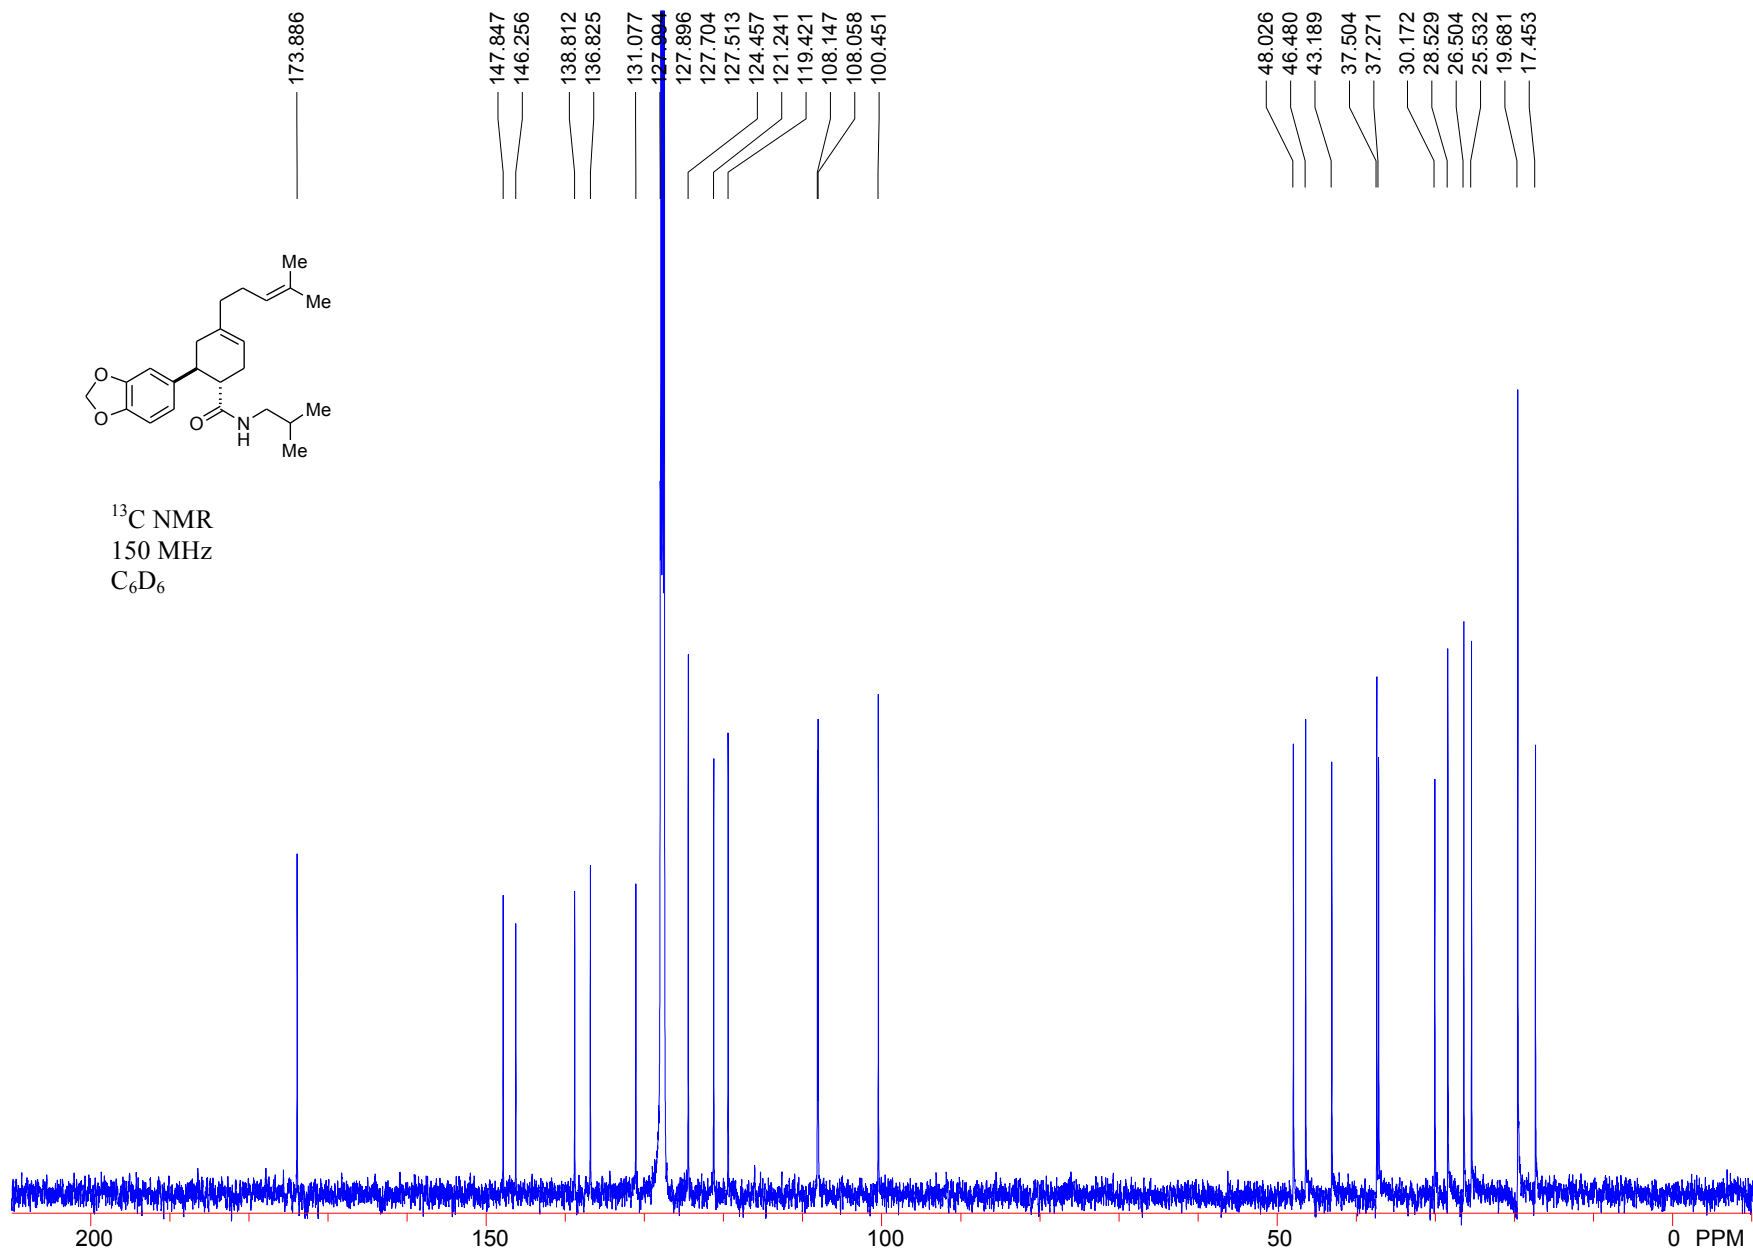

$^1\text{H NMR}$   
600 MHz  
 $\text{C}_6\text{D}_6$

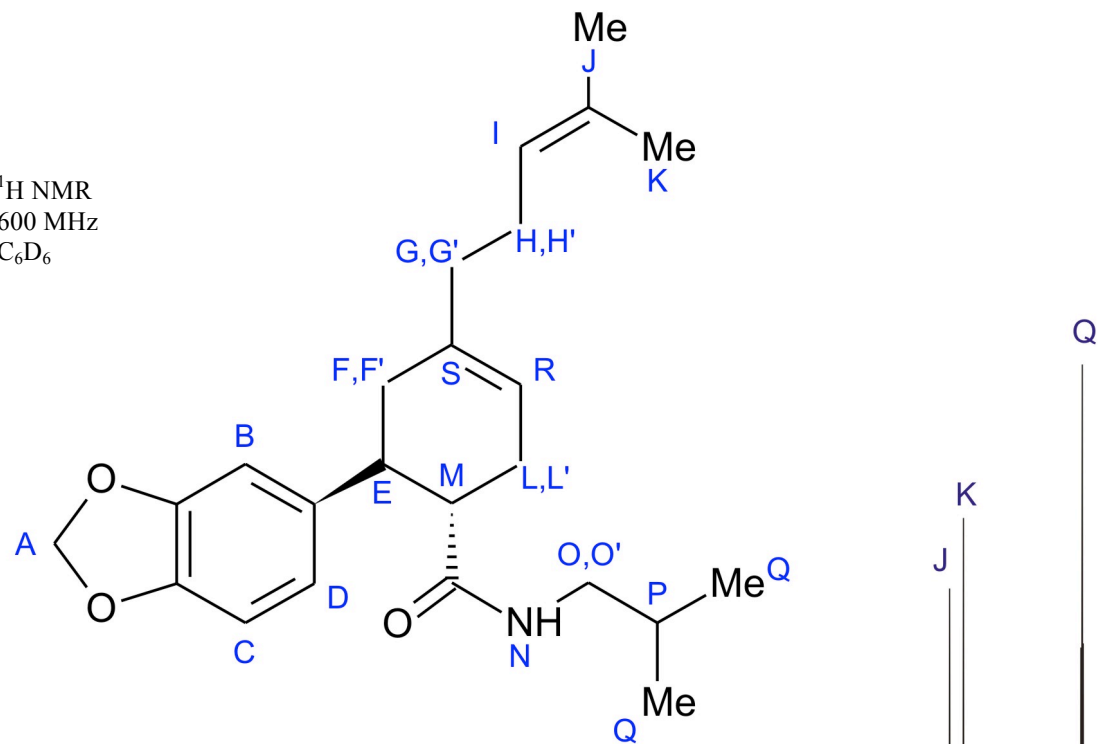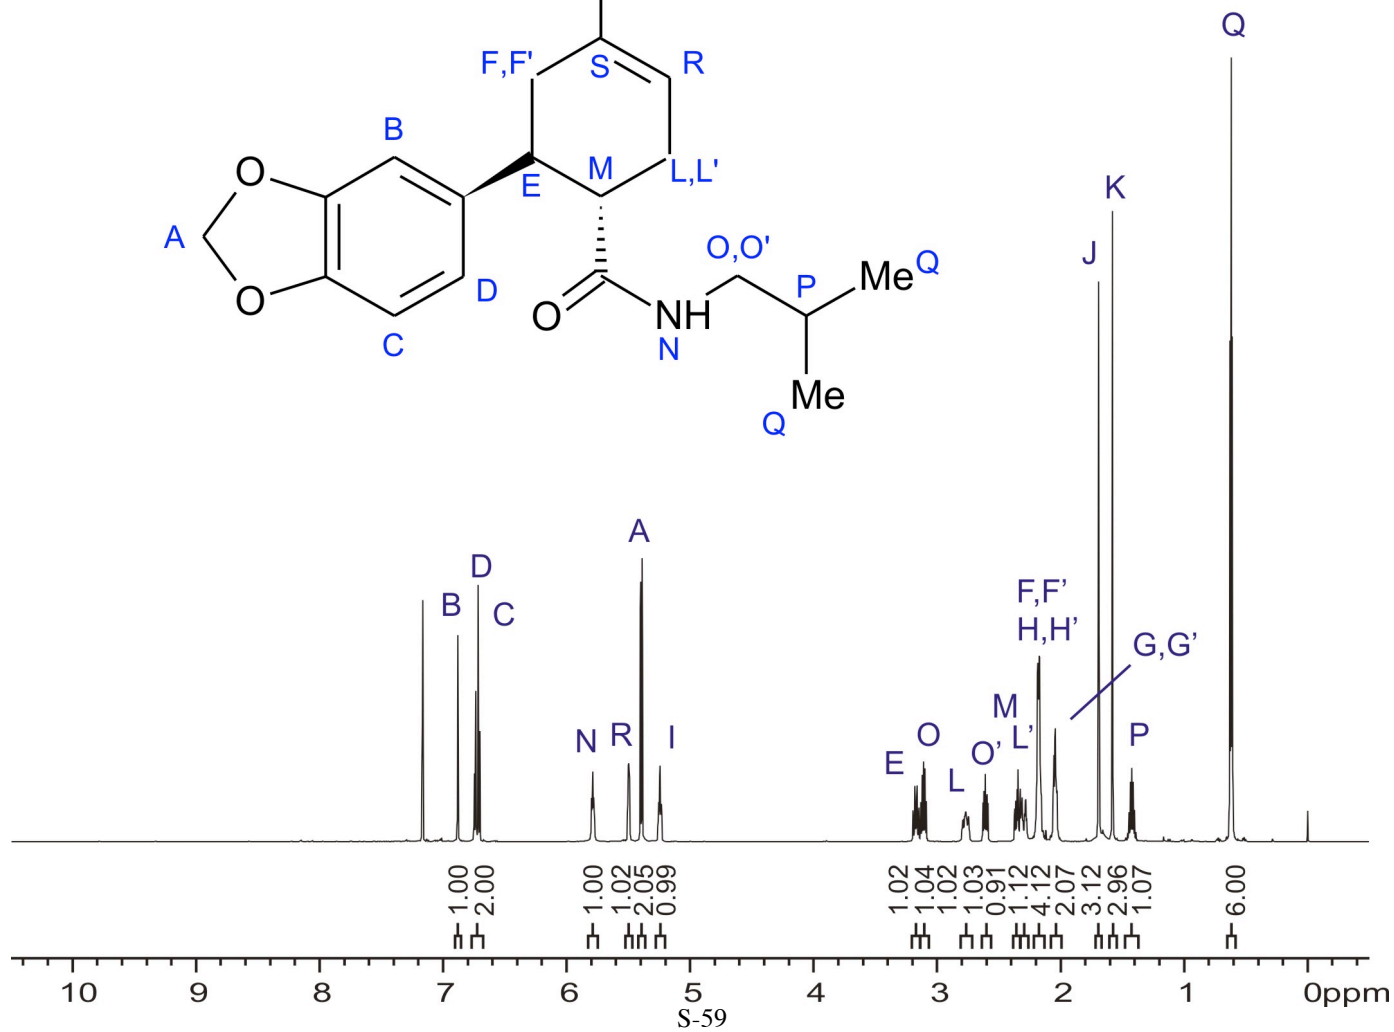

## NOE Effect

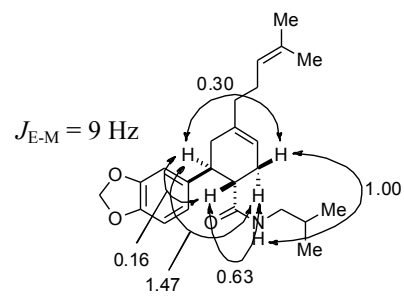

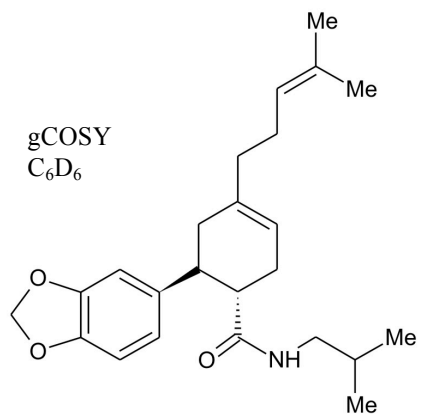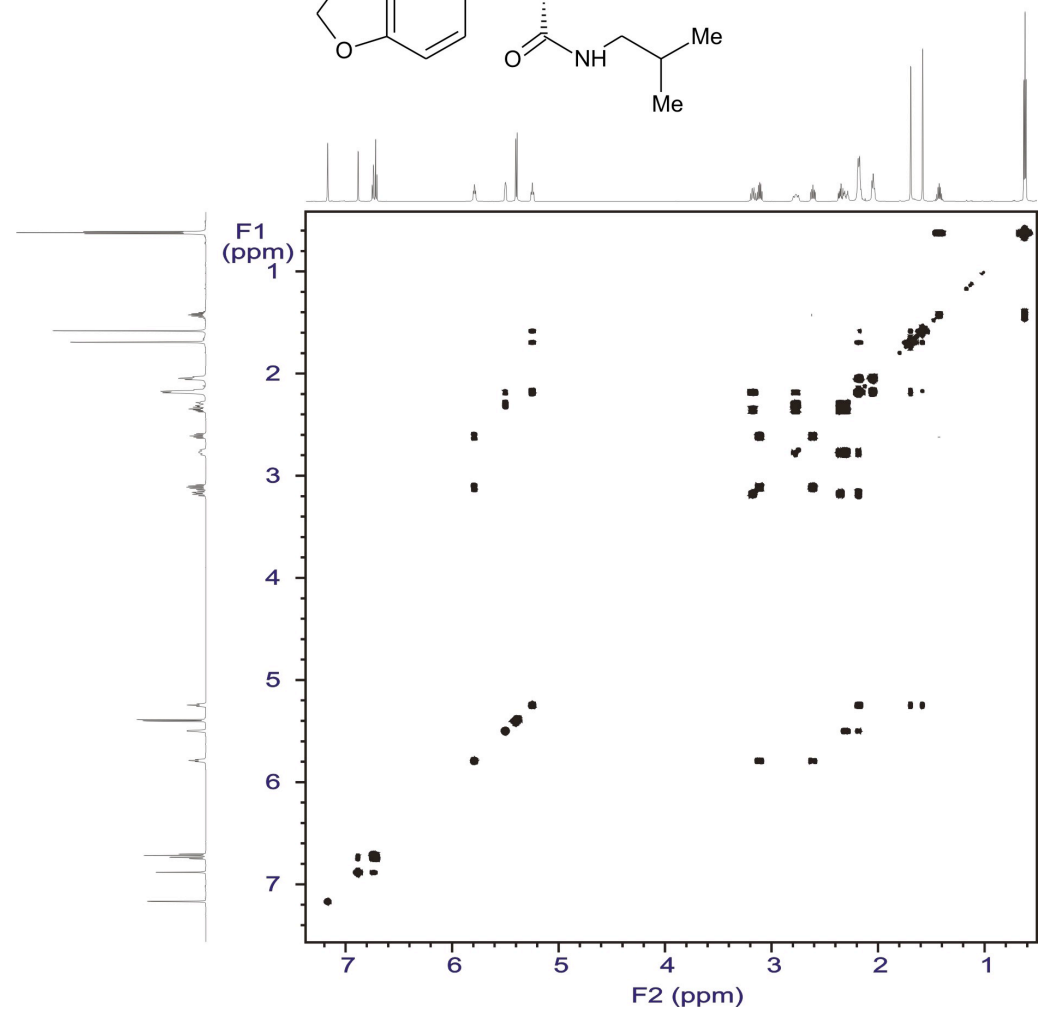

HSQC  
C<sub>6</sub>D<sub>6</sub>

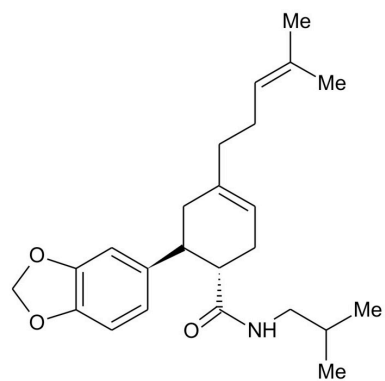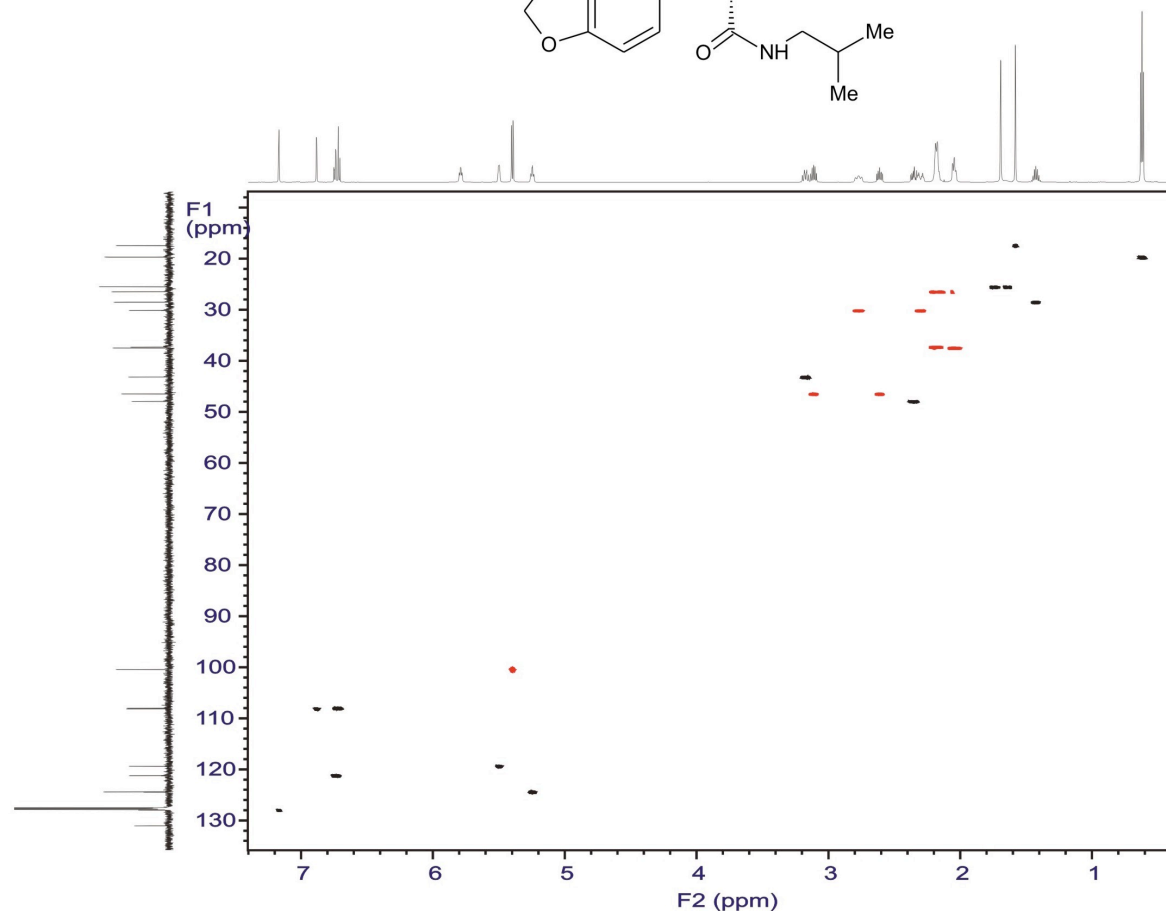

HMBC  
C<sub>6</sub>D<sub>6</sub>

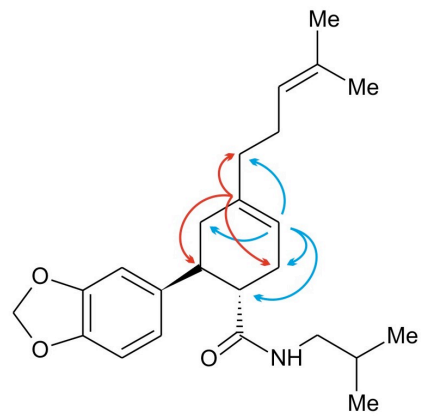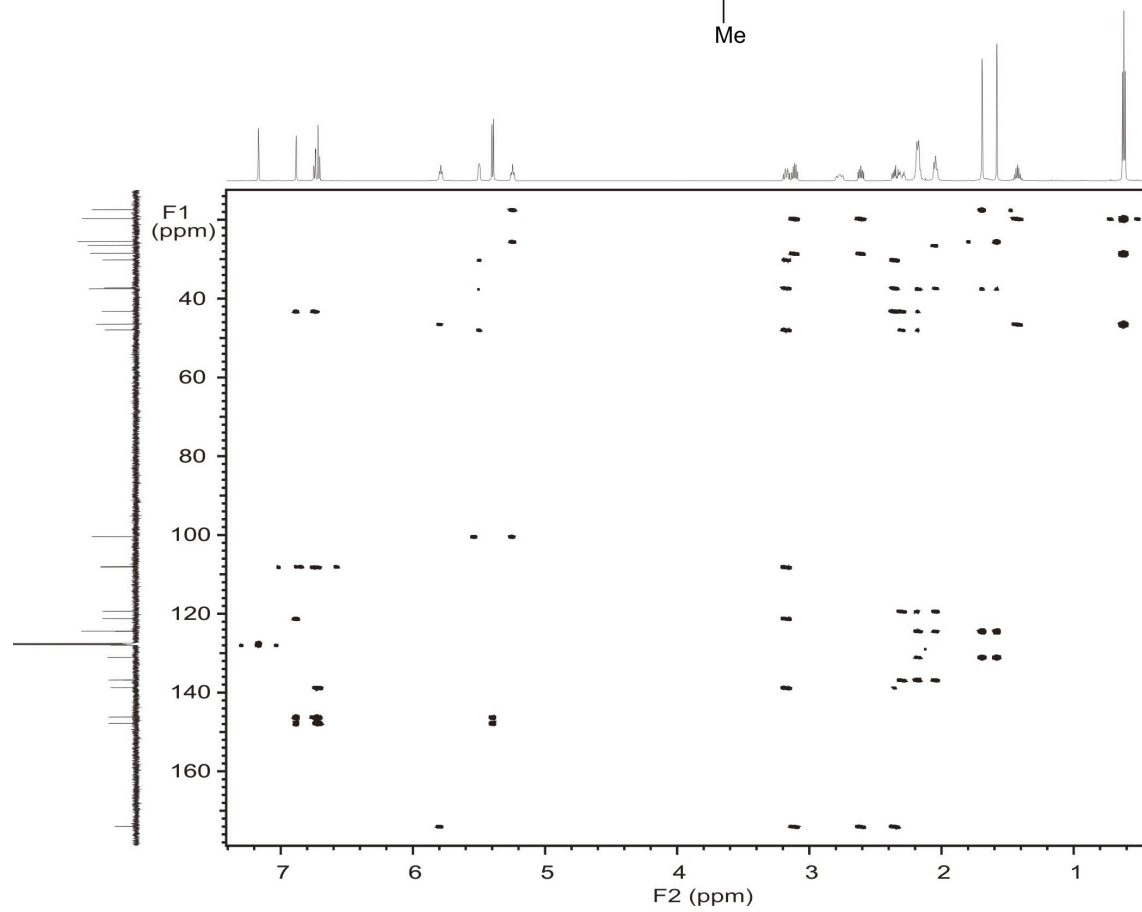

S-63

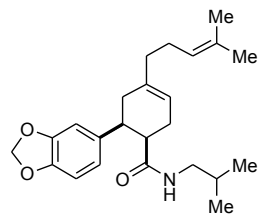

<sup>1</sup>H NMR  
500 MHz  
CDCl<sub>3</sub>

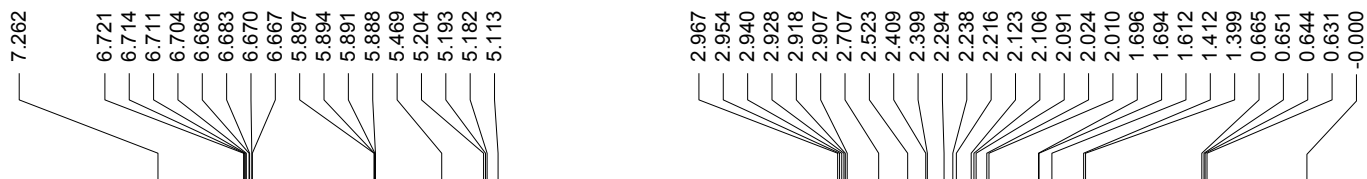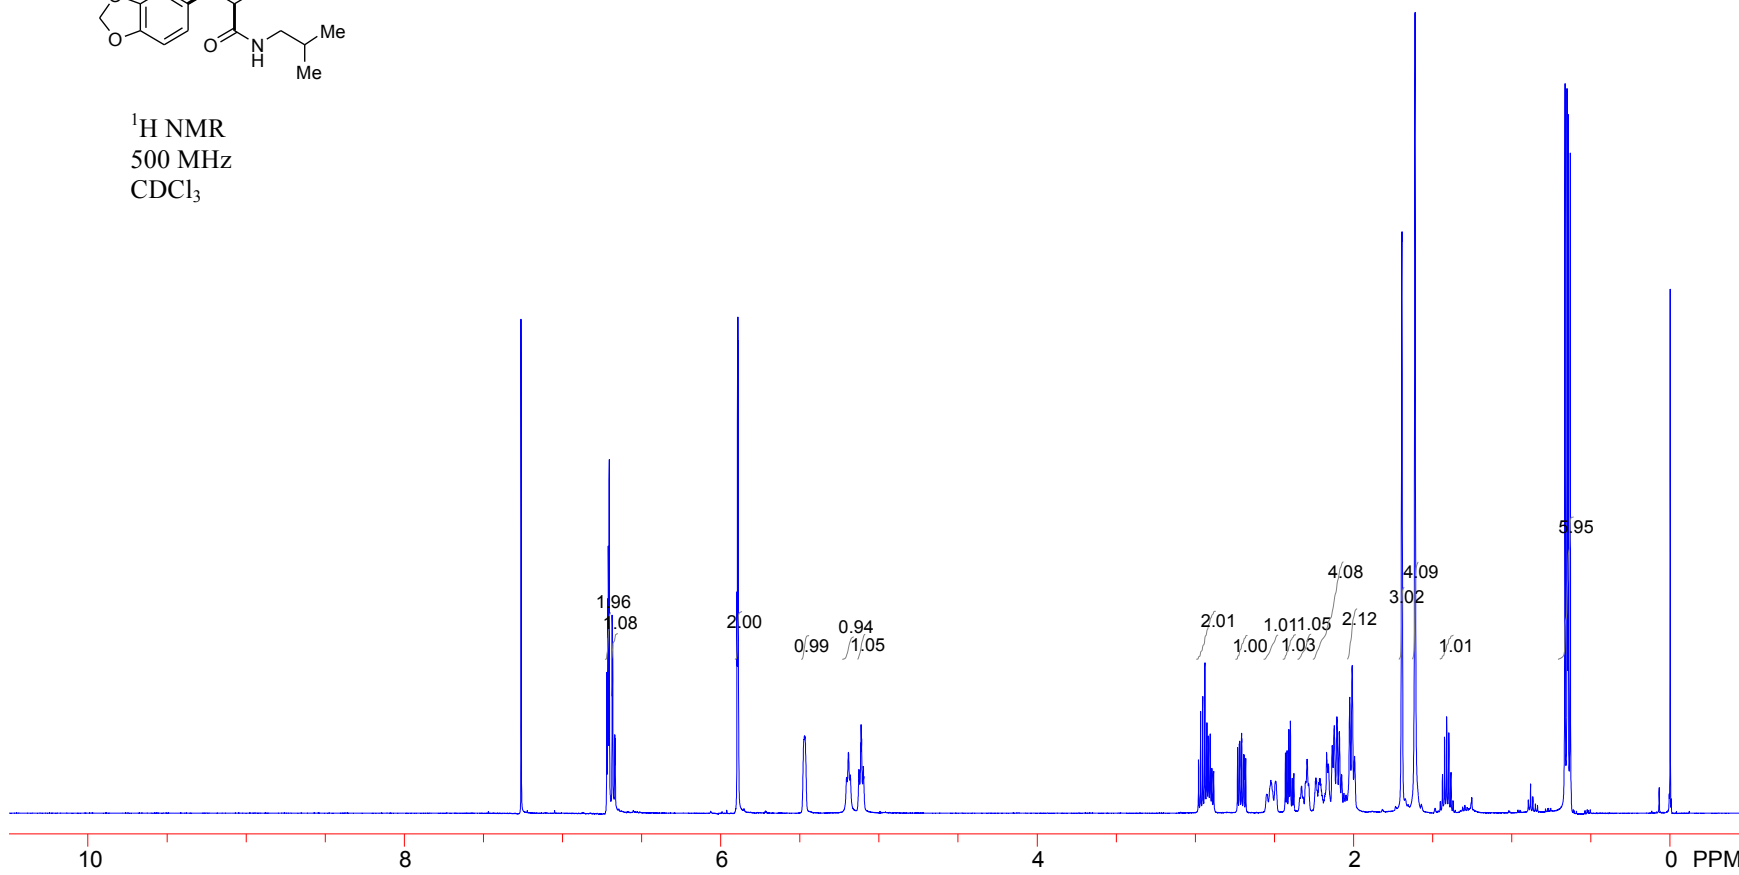



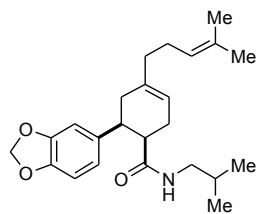

$^{13}\text{C}$  NMR  
125 MHz  
 $\text{CDCl}_3$

174.353

147.648

146.048

138.309

136.351

131.677

124.065

120.759

119.754

108.299

107.638

100.781

77.252

76.998

76.743

49.377

46.593

42.740

37.367

33.601

32.695

28.295

26.345

25.677

19.750

17.703

200 150 100 50 0 PPM
